# Supplementary material for: Associated factors and global adherence of cervical cancer screening in 2019: a systematic analysis and modelling study
Source: PubMed Central journal article supplement (PMC9733311; doi:10.1186/s12992-022-00890-w), 2022-12-09
Supplement: 12992_2022_890_MOESM2_ESM.pdf [file 12992_2022_890_MOESM2_ESM.pdf]

## GATHER Checklist

| Item number                                                                                    | Checklist item                                                                                                                                                                                                                                                                                                                                                                          | Location where item is reported |
|------------------------------------------------------------------------------------------------|-----------------------------------------------------------------------------------------------------------------------------------------------------------------------------------------------------------------------------------------------------------------------------------------------------------------------------------------------------------------------------------------|---------------------------------|
| <b>Objectives and funding</b>                                                                  |                                                                                                                                                                                                                                                                                                                                                                                         |                                 |
| 1                                                                                              | Define the indicator(s), populations (including age, sex, and geographic entities), and time period(s) for which estimates were made.                                                                                                                                                                                                                                                   | 4                               |
| 2                                                                                              | List the funding sources for the work.                                                                                                                                                                                                                                                                                                                                                  | 18                              |
| <b>Data inputs</b>                                                                             |                                                                                                                                                                                                                                                                                                                                                                                         |                                 |
| For all data inputs from multiple sources that are synthesised as part of the study:           |                                                                                                                                                                                                                                                                                                                                                                                         |                                 |
| 3                                                                                              | Describe how the data were identified and how the data were accessed.                                                                                                                                                                                                                                                                                                                   | 5-6                             |
| 4                                                                                              | Specify the inclusion and exclusion criteria. Identify all ad-hoc exclusions.                                                                                                                                                                                                                                                                                                           | 5                               |
| 5                                                                                              | Provide information about all included data sources and their main characteristics. For each data source used, report reference information or contact name/institution, population represented, data collection method, year(s) of data collection, sex and age range, diagnostic criteria or measurement method, and sample size, as relevant.                                        | Table S6                        |
| 6                                                                                              | Identify and describe any categories of input data that have potentially important biases (eg, based on characteristics listed in item 5).                                                                                                                                                                                                                                              | Table S3, Table S7              |
| For data inputs that contribute to the analysis but were not synthesised as part of the study: |                                                                                                                                                                                                                                                                                                                                                                                         |                                 |
| 7                                                                                              | Describe and give sources for any other data inputs.                                                                                                                                                                                                                                                                                                                                    | 6-7                             |
| For all data inputs:                                                                           |                                                                                                                                                                                                                                                                                                                                                                                         |                                 |
| 8                                                                                              | Provide all data inputs in a file format from which data can be efficiently extracted (eg, a spreadsheet rather than a PDF), including all relevant meta-data listed in item 5. For any data inputs that cannot be shared because of ethical or legal reasons, such as third-party ownership, provide a contact name or the name of the institution that retains the right to the data. | NA                              |
| <b>Data analysis</b>                                                                           |                                                                                                                                                                                                                                                                                                                                                                                         |                                 |
| 9                                                                                              | Provide a conceptual overview of the data analysis method. A diagram may be helpful.                                                                                                                                                                                                                                                                                                    | 7-8                             |
| 10                                                                                             | Provide a detailed description of all steps of the analysis, including mathematical formulae. This description should cover, as relevant, data cleaning, data pre-processing, data adjustments and weighting of data sources, and mathematical or statistical model(s).                                                                                                                 | 7-8                             |
| 11                                                                                             | Describe how candidate models were evaluated and how the final model(s) were selected.                                                                                                                                                                                                                                                                                                  | 7-8                             |
| 12                                                                                             | Provide the results of an evaluation of model performance, if done, as well as the results of any relevant sensitivity analysis.                                                                                                                                                                                                                                                        | NA                              |

| Item number                   | Checklist item                                                                                                                                                  | Location where item is reported |
|-------------------------------|-----------------------------------------------------------------------------------------------------------------------------------------------------------------|---------------------------------|
| 13                            | Describe methods of calculating uncertainty of the estimates. State which sources of uncertainty were, and were not, accounted for in the uncertainty analysis. | NA                              |
| 14                            | State how analytical or statistical source code used to generate estimates can be accessed.                                                                     | NA                              |
| <b>Results and discussion</b> |                                                                                                                                                                 |                                 |
| 15                            | Provide published estimates in a file format from which data can be efficiently extracted.                                                                      | Table S6                        |
| 16                            | Report a quantitative measure of the uncertainty of the estimates (eg, uncertainty intervals).                                                                  | 10-11, Table 2                  |
| 17                            | Interpret results in light of existing evidence. If updating a previous set of estimates, describe the reasons for changes in estimates.                        | 14-15                           |
| 18                            | Discuss limitations of the estimates. Include a discussion of any modelling assumptions or data limitations that affect interpretation of the estimates.        | 15-16                           |
