# Supplementary material for: Associated factors and global adherence of cervical cancer screening in 2019: a systematic analysis and modelling study
Source: PubMed Central journal article supplement (PMC9733311; doi:10.1186/s12992-022-00890-w), 2022-12-09
Supplement: 12992_2022_890_MOESM3_ESM.pdf [file 12992_2022_890_MOESM3_ESM.pdf]

**Table S1** Searching strategy to identify studies focusing on adherence to cervical cancer screening

**Table S2** The time lag between investigation and publication in the included studies reporting the adherence rate of cervical cancer screening (Mean=5.40 years)

**Table S3** Quality assessment scale for rating the risk of bias

**Table S4** Univariable and multivariable meta-regression models of cluster-level factors related to the adherence rate of cervical cancer screening (logit form)

**Table S5** Reference list of the included studies

**Table S6** Basic characteristics of the included studies

**Table S7** Quality scores for assessing the risk of bias for the included studies

**Table S8** Meta-analyses of associated factors for adherence to cervical cancer screening

**Table S9** Pooled or reported adherence rate of cervical cancer screening in 28 countries with available data

**Figure S1** Geographic distribution of the included studies

**Figure S2** The estimated relation between age and adherence rates of cervical cancer screening based on informative data points from the included articles, by SDI

**Figure S3** Adherence rate of cervical cancer screening by country

**Table S1** Searching strategy to identify studies focusing on adherence to cervical cancer screening

| Database                                | Accessed date               | Search terms                                                                                                                                                                                                                                                                                                                                                                                                                                                                                                                                                                                                                                                                                             |
|-----------------------------------------|-----------------------------|----------------------------------------------------------------------------------------------------------------------------------------------------------------------------------------------------------------------------------------------------------------------------------------------------------------------------------------------------------------------------------------------------------------------------------------------------------------------------------------------------------------------------------------------------------------------------------------------------------------------------------------------------------------------------------------------------------|
| PubMed                                  | 23 <sup>th</sup> June, 2021 | (cancer*[Title/Abstract] OR neoplas*[Title/Abstract] OR carcinoma*[Title/Abstract] OR tumor*[Title/Abstract] OR tumour*[Title/Abstract] ) AND (cervi*[Title/Abstract] OR uterine neck[Title/Abstract] OR neck of uterus[Title/Abstract]) AND (screen*[Title/Abstract] OR early detection[Title/Abstract] OR Papanicolaou test*[Title/Abstract] OR Pap test*[Title/Abstract] OR Pap smear*[Title/Abstract] OR vaginal smear*[Title/Abstract] OR HPV test*[Title/Abstract] OR cervical cytology[Title/Abstract] OR colposcop*[Title/Abstract]) AND (adhere*[Title/Abstract] OR complianc*[Title/Abstract] OR participation*[Title/Abstract] OR attendan*[Title/Abstract]) Filters: from 1000/1/1-2021/6/23 |
| Web of Science                          | 23 <sup>th</sup> June, 2021 | TOPIC: (Cancer* OR neoplas* OR carcinoma* OR tumor* OR tumour*) AND TOPIC: (cervi* OR uterine neck OR neck of uterus) AND TOPIC: (screen* OR early detection OR Papanicolaou test* OR Pap test* OR Pap smear* OR vaginal smear* OR HPV test* OR cervical cytology OR colposcop*) AND TOPIC: (adhere* OR complianc* OR participation* OR attendan*)                                                                                                                                                                                                                                                                                                                                                       |
| Embase                                  | 23 <sup>th</sup> June, 2021 | #1 (cancer*:ab,ti OR neoplas*:ab,ti OR carcinoma*:ab,ti OR tumor*:ab,ti OR tumour*:ab,ti) AND (cervi*:ab,ti OR 'uterine neck':ab,ti OR 'neck of uterus':ab,ti) AND (screen*:ab,ti OR 'early detection':ab,ti OR 'papanicolaou test*':ab,ti OR 'pap test*':ab,ti OR 'pap smear*':ab,ti OR 'vaginal smear*':ab,ti OR 'hpv test*':ab,ti OR 'cervical cytology':ab,ti OR colposcop*:ab,ti) AND (adhere*:ab,ti OR complianc*:ab,ti OR participation*:ab,ti OR attendan*:ab,ti) AND [1966-2021]/py<br>#1 AND ('article'/it OR 'article in press'/it OR 'review'/it)                                                                                                                                            |
| China National Knowledge Infrastructure | 23 <sup>th</sup> June, 2021 | TOPIC: (癌 OR 瘤) AND (宫颈 OR 子宫颈) AND (筛查 OR 筛检 OR 巴氏试验 OR 巴氏涂片 OR 细胞学检查 OR HPV 检查) AND (依从 OR 参与 OR 行为)                                                                                                                                                                                                                                                                                                                                                                                                                                                                                                                                                                                                   |
| Wanfang data                            | 23 <sup>th</sup> June, 2021 | TOPIC: (癌 OR 瘤) AND (宫颈 OR 子宫颈) AND (筛查 OR 筛检 OR 巴氏试验 OR 巴氏涂片 OR 细胞学检查 OR HPV 检查) AND (依从 OR 参与 OR 行为)                                                                                                                                                                                                                                                                                                                                                                                                                                                                                                                                                                                                   |
| Google Web                              | 23 <sup>th</sup> June, 2021 | “cervical cancer” AND screening AND (adherence OR participation OR attendance) -pubmed                                                                                                                                                                                                                                                                                                                                                                                                                                                                                                                                                                                                                   |
| ProQuest Dissertations & Theses Global  | 23 <sup>th</sup> June, 2021 | noft("cervical cancer") AND noft(screening) AND noft(adherence OR participation OR attendance)                                                                                                                                                                                                                                                                                                                                                                                                                                                                                                                                                                                                           |

**Table S2** The time lag between investigation and publication in the included studies reporting the adherence rate of cervical cancer screening (Mean = 5.40 years)

| Study ID | Study                              | Year published | Year investigated | Time-lag (year) |
|----------|------------------------------------|----------------|-------------------|-----------------|
| 1        | Cohen MM, et al. (1992)            | 1992           | 1983              | 9               |
| 2        | Lantz PM, et al. (1997)            | 1997           | 1993              | 4               |
| 3        | Risendal B, et al. (1999)          | 1999           | 1996              | 3               |
| 4        | Fernandez ME, et al. (1999)        | 1999           | 1996              | 3               |
| 5        | Rohlf s I, et al. (1999)           | 1999           | 1992              | 7               |
| 6        | Taylor VM, et al. (1999)           | 1999           | 1998              | 1               |
| 7        | Maxwell AE, et al. (2000)          | 2000           | 1996              | 4               |
| 8        | Ramirez AG, et al. (2000)          | 2000           | 1994              | 6               |
| 9        | Maxwell CJ, et al. (2001)          | 2001           | 1997              | 4               |
| 10       | Do HH, et al. (2001)               | 2001           | 1999              | 2               |
| 11       | Jirojwong S, et al. (2001)         | 2001           | 1998              | 3               |
| 12       | Lee J, et al. (2002)               | 2002           | 1998              | 4               |
| 13       | Cyrus-David MS, et al. (2002)      | 2002           | 1996              | 6               |
| 14       | Amonkar MM, et al. (2002)          | 2002           | 1997              | 5               |
| 15       | Fernandez-Esquer ME, et al. (2003) | 2003           | 1992              | 11              |
| 16       | Selvin E, et al. (2003)            | 2003           | 1992              | 11              |
| 17       | Juon HS, et al. (2003)             | 2003           | 2000              | 3               |
| 18       | Miedema BB, et al. (2003)          | 2003           | 2002              | 1               |
| 19       | Hou SI, et al. (2003)              | 2003           | 1999              | 4               |
| 20       | Luengo Matos S, et al. (2003)      | 2003           | 2000              | 3               |
| 21       | Taylor VM, et al. (2004)           | 2004           | 2002              | 2               |
| 22       | Coronado GD, et al. (2004)         | 2004           | 1998              | 6               |
| 23       | Insinga RP, et al. (2004)          | 2004           | 2000              | 4               |
| 24       | Dettenborn L, et al. (2004)        | 2004           | NA                | NA              |
| 25       | Borrayo EA, et al. (2004)          | 2004           | NA                | NA              |
| 26       | Bazargan M, et al. (2004)          | 2004           | 1999              | 5               |
| 27       | Cho IS, et al. (2004)              | 2004           | 2000              | 4               |
| 28       | Hoyo C, et al. (2005)              | 2005           | 2001              | 4               |
| 29       | De Alba I, et al(2005)             | 2005           | 2001              | 4               |
| 30       | Kwak MS, et al. (2005)             | 2005           | 2004              | 1               |
| 31       | Giorgi Rossi P, et al. (2006)      | 2006           | 2004              | 2               |
| 32       | Carruth AK, et al. (2006)          | 2006           | NA                | NA              |

| <b>Study ID</b> | <b>Study</b>                     | <b>Year published</b> | <b>Year investigated</b> | <b>Time-lag (year)</b> |
|-----------------|----------------------------------|-----------------------|--------------------------|------------------------|
| 33              | Liao CC, et al. (2006)           | 2006                  | 2000                     | 6                      |
| 34              | Lee-Lin F, et al. (2007)         | 2007                  | NA                       | NA                     |
| 35              | Chen LS, et al. (2007)           | 2007                  | 2002                     | 5                      |
| 36              | Gao W, et al. (2008)             | 2008                  | 2007                     | 1                      |
| 37              | Tsui J et al. (2008)             | 2008                  | 2003                     | 5                      |
| 38              | Puig-Tintore LM, et al. (2008)   | 2008                  | 2005                     | 3                      |
| 39              | Ginde AA, et al. (2008)          | 2008                  | 2007                     | 1                      |
| 40              | Tung WC, et al. (2008)           | 2008                  | NA                       | NA                     |
| 41              | Nelson W, et al. (2009)          | 2009                  | 2005                     | 4                      |
| 42              | Ma GX, et al. (2009)             | 2009                  | 2006                     | 3                      |
| 43              | Dimitrakaki C, et al. (2009)     | 2009                  | 2006                     | 3                      |
| 44              | Amankwah E, et al. (2009)        | 2009                  | 2003                     | 6                      |
| 45              | Taylor VM, et al. (2009)         | 2009                  | 2005                     | 4                      |
| 46              | Sun YG, et al. (2009)            | 2009                  | NA                       | NA                     |
| 47              | Martin-Lopez R, et al. (2010)    | 2010                  | 2007                     | 3                      |
| 48              | Zhou J, et al. (2010)            | 2010                  | 2000                     | 10                     |
| 49              | Byrne MM, et al. (2010)          | 2010                  | 2007                     | 3                      |
| 50              | Lopez-de-Andres A, et al. (2010) | 2010                  | 2005                     | 5                      |
| 51              | Lim JW, et al. (2010)            | 2010                  | 2007                     | 3                      |
| 52              | Paskett ED, et al. (2010)        | 2010                  | 2006                     | 4                      |
| 53              | Lee K, et al. (2010)             | 2010                  | 2005                     | 5                      |
| 54              | Meng RL, et al. (2010)           | 2010                  | NA                       | NA                     |
| 55              | Wang CF, et al. (2010)           | 2010                  | 2007                     | 3                      |
| 56              | Lawsin C, et al. (2011)          | 2011                  | NA                       | NA                     |
| 57              | Cheung NW, et al. (2011)         | 2011                  | 2004                     | 7                      |
| 58              | Pons-Vigues M, et al. (2011)     | 2011                  | NA                       | NA                     |
| 59              | Tekkel M, et al. (2011)          | 2011                  | 2004                     | 7                      |
| 60              | Nuno T, et al. (2011)            | 2011                  | 2006                     | 5                      |
| 61              | Hansen BT, et al. (2011)         | 2011                  | 2005                     | 6                      |
| 62              | MacLaughlan SD, et al. (2011)    | 2011                  | 2006                     | 5                      |
| 63              | Vakfari A, et al. (2011)         | 2011                  | 2007                     | 4                      |
| 64              | Acikgoz A, et al. (2011)         | 2011                  | 2009                     | 2                      |
| 65              | Lee M, et al. (2011)             | 2011                  | 2008                     | 3                      |
| 66              | Liang Q, et al. (2011)           | 2011                  | NA                       | NA                     |
| 67              | Nguyen-Truong CK, et al. (2012)  | 2012                  | 2010                     | 2                      |
| 68              | Worthington C, et al. (2012)     | 2012                  | 2000                     | 12                     |

| <b>Study ID</b> | <b>Study</b>                  | <b>Year published</b> | <b>Year investigated</b> | <b>Time-lag (year)</b> |
|-----------------|-------------------------------|-----------------------|--------------------------|------------------------|
| 69              | Gonzalez P, et al. (2012)     | 2012                  | 2007                     | 5                      |
| 70              | Damiani G, et al. (2012)      | 2012                  | 2005                     | 7                      |
| 71              | Martin-Lopez R, et al. (2012) | 2012                  | 2009                     | 3                      |
| 72              | Muus KJ, et al. (2012)        | 2012                  | 2005                     | 7                      |
| 73              | Olesen SC, et al. (2012)      | 2012                  | NA                       | NA                     |
| 74              | Macedo A, et al. (2012)       | 2012                  | 2010                     | 2                      |
| 75              | Ko KD, et al. (2012)          | 2012                  | 2005                     | 7                      |
| 76              | Azerkan F, et al. (2012)      | 2012                  | 1999                     | 13                     |
| 77              | Aminisani N, et al. (2012)    | 2012                  | 2003                     | 9                      |
| 78              | Nuno T, et al. (2012)         | 2012                  | 2008                     | 4                      |
| 79              | Shelton RC, et al. (2012)     | 2012                  | NA                       | NA                     |
| 80              | Ashok M, et al. (2012)        | 2012                  | 2008                     | 4                      |
| 81              | Leone LA, et al. (2012)       | 2012                  | NA                       | NA                     |
| 82              | Shippee ND, et al. (2012)     | 2012                  | 2007                     | 5                      |
| 83              | Aminisani N, et al. (2012)    | 2012                  | 2002                     | 10                     |
| 84              | Raz R, et al. (2012)          | 2012                  | 2007                     | 5                      |
| 85              | Borges MF, et al. (2012)      | 2012                  | 2008                     | 4                      |
| 86              | Almeida CM, et al. (2013)     | 2013                  | 2008                     | 5                      |
| 87              | Morrison TB, et al. (2013)    | 2013                  | 2007                     | 6                      |
| 88              | Oussaid N, et al. (2013)      | 2013                  | 2008                     | 5                      |
| 89              | Cerigo H, et al. (2013)       | 2013                  | 2005                     | 8                      |
| 90              | Augusto EF, et al. (2013)     | 2013                  | 2010                     | 3                      |
| 91              | Khadilkar A, et al. (2013)    | 2013                  | 2008                     | 5                      |
| 92A             | Lee M, et al. (2013)          | 2013                  | 1998                     | 15                     |
| 92B             | Lee M, et al. (2013)          | 2013                  | 2001                     | 12                     |
| 92C             | Lee M, et al. (2013)          | 2013                  | 2005                     | 8                      |
| 92D             | Lee M, et al. (2013)          | 2013                  | 2008                     | 5                      |
| 92E             | Lee M, et al. (2013)          | 2013                  | 2010                     | 3                      |
| 93              | Suh M, et al. (2013)          | 2013                  | 2012                     | 1                      |
| 94              | Hernandez CM, et al. (2014)   | 2014                  | 2011                     | 3                      |
| 95              | Tsai RJ, et al. (2014)        | 2014                  | 2010                     | 4                      |
| 96              | Adonis L, et al. (2014)       | 2014                  | 2009                     | 5                      |
| 97              | Moudatsou MM, et al. (2014)   | 2014                  | 2007                     | 7                      |
| 98              | Kristensson JH, et al. (2014) | 2014                  | 2005                     | 9                      |

| <b>Study ID</b> | <b>Study</b>                       | <b>Year published</b> | <b>Year investigated</b> | <b>Time-lag (year)</b> |
|-----------------|------------------------------------|-----------------------|--------------------------|------------------------|
| 99A             | Arbyn M, et al. (2014)             | 2014                  | 2005                     | 9                      |
| 99B             | Arbyn M, et al. (2014)             | 2014                  | 2003                     | 11                     |
| 99C             | Arbyn M, et al. (2014)             | 2014                  | 1999                     | 15                     |
| 99D             | Arbyn M, et al. (2014)             | 2014                  | 1997                     | 17                     |
| 100             | Calo WA (2014)                     | 2014                  | 2010                     | 4                      |
| 101             | Documet P, et al. (2015)           | 2015                  | 2010                     | 5                      |
| 102             | Guo F, et al. (2015)               | 2015                  | 2013                     | 2                      |
| 103             | Visanuyothin S, et al. (2015)      | 2015                  | 2012                     | 3                      |
| 104             | Ricardo-Rodrigues I, et al. (2015) | 2015                  | 2012                     | 3                      |
| 105             | Miranda-Diaz C, et al. (2015)      | 2015                  | 2012                     | 3                      |
| 106             | Gyulai A, et al. (2015)            | 2015                  | 2008                     | 7                      |
| 107             | Richard A, et al. (2015)           | 2015                  | 2012                     | 3                      |
| 108             | Schoofs J, et al. (2015)           | 2015                  | 2012                     | 3                      |
| 109             | Ostensson E, et al. (2015)         | 2015                  | 2013                     | 2                      |
| 110             | Barbadoro P, et al. (2015)         | 2015                  | 2005                     | 10                     |
| 111             | Du MX, et al. (2015)               | 2015                  | NA                       | NA                     |
| 112             | Hirth JM, et al. (2016)            | 2016                  | 2012                     | 4                      |
| 113             | Crawford A, et al. (2016)          | 2016                  | 2014                     | 2                      |
| 114             | Shneyderman Y, et al. (2016)       | 2016                  | 2003                     | 13                     |
| 114             | Shneyderman Y, et al. (2016)       | 2016                  | 2007                     | 9                      |
| 115             | Valdovinos C, et al. (2016)        | 2016                  | 2010                     | 9                      |
| 116             | Urrutia MT, et al. (2016)          | 2016                  | NA                       | NA                     |
| 117             | Bianco A, et al. (2017)            | 2017                  | 2012                     | 6                      |
| 118             | Comparetto C, et al. (2017)        | 2017                  | 2006                     | 11                     |
| 119A            | Parekh N, et al. (2017)            | 2017                  | 2007                     | 10                     |
| 119B            | Parekh N, et al. (2017)            | 2017                  | 2010                     | 7                      |
| 120             | Leinonen MK, et al. (2017)         | 2017                  | 2010                     | 7                      |
| 121             | White A, et al. (2017)             | 2017                  | 2015                     | 2                      |
| 122             | Tung WC, et al. (2017)             | 2017                  | 2015                     | 2                      |
| 123             | Cadet TJ, et al. (2017)            | 2017                  | 2008                     | 9                      |
| 124             | Lofters AK, et al. (2017)          | 2017                  | 2015                     | 2                      |
| 125             | Zorogastua K, et al. (2017)        | 2017                  | NA                       | NA                     |
| 126             | Chang HK, et al. (2017)            | 2017                  | 2011                     | 6                      |
| 127             | Cofie LE, et al. (2018)            | 2018                  | 2015                     | 3                      |
| 128             | Luque JS, et al. (2018)            | 2018                  | 2014                     | 4                      |
| 129             | Rendle KA, et al. (2018)           | 2018                  | 2013                     | 5                      |

| <b>Study ID</b> | <b>Study</b>                      | <b>Year published</b> | <b>Year investigated</b> | <b>Time-lag (year)</b> |
|-----------------|-----------------------------------|-----------------------|--------------------------|------------------------|
| 130             | Petrelli A, et al. (2018)         | 2018                  | 2013                     | 5                      |
| 131             | Han J, et al. (2018)              | 2018                  | 2017                     | 1                      |
| 132             | Restivo V, et al. (2018)          | 2018                  | 2016                     | 2                      |
| 133             | Luque JS, et al. (2018)           | 2018                  | 2016                     | 2                      |
| 134A            | Petkeviciene J, et al. (2018)     | 2018                  | 2006                     | 12                     |
| 134B            | Petkeviciene J, et al. (2018)     | 2018                  | 2008                     | 10                     |
| 134C            | Petkeviciene J, et al. (2018)     | 2018                  | 2010                     | 8                      |
| 134D            | Petkeviciene J, et al. (2018)     | 2018                  | 2012                     | 6                      |
| 134E            | Petkeviciene J, et al. (2018)     | 2018                  | 2014                     | 4                      |
| 135             | Moreno PI, et al. (2019)          | 2019                  | 2010                     | 9                      |
| 136             | Lucas-Wright A, et al. (2019)     | 2019                  | 2014                     | 5                      |
| 137             | MacLaughlin KL, et al. (2019)     | 2019                  | 2011                     | 8                      |
| 138             | Kaso M, et al. (2019)             | 2019                  | 2013                     | 6                      |
| 139             | Perez CM, et al. (2020)           | 2020                  | NA                       | NA                     |
| 140             | Charkhchi P, et al. (2020)        | 2020                  | 2016                     | 4                      |
| 141             | Abar B, et al. (2020)             | 2020                  | NA                       | NA                     |
| 142             | Maxwell AE, et al. (2020)         | 2020                  | 2017                     | 3                      |
| 143             | Zamorano-Leon JJ, et al. (2020)   | 2020                  | 2017                     | 3                      |
| 144A            | Garrido CO, et al. (2020)         | 2020                  | 2008                     | 12                     |
| 144B            | Garrido CO, et al. (2020)         | 2020                  | 2010                     | 10                     |
| 144C            | Garrido CO, et al. (2020)         | 2020                  | 2012                     | 8                      |
| 144D            | Garrido CO, et al. (2020)         | 2020                  | 2014                     | 6                      |
| 144E            | Garrido CO, et al. (2020)         | 2020                  | 2016                     | 4                      |
| 144F            | Garrido CO, et al. (2020)         | 2020                  | 2018                     | 2                      |
| 145             | Wilding S, et al. (2020)          | 2020                  | NA                       | NA                     |
| 146             | Franck JE, et al. (2020)          | 2020                  | 2014                     | 6                      |
| 147             | Lee HY, et al. (2020)             | 2020                  | NA                       | NA                     |
| 148             | Barrera-Castillo M, et al. (2020) | 2020                  | 2012                     | 8                      |
| 149             | Deguara M, et al. (2020)          | 2020                  | 2017                     | 3                      |
| 150             | dos Santos NLF, et al. (2020)     | 2020                  | 2018                     | 2                      |
| 151             | Malone C, et al. (2021)           | 2021                  | 2015                     | 6                      |
| 152             | Pelullo CP, et al. (2021)         | 2021                  | 2019                     | 2                      |
| 153             | Ishii K, et al. (2021)            | 2021                  | 2016                     | 5                      |

Abbreviations: NA, not available.

**Table S3** Quality assessment scale for rating the risk of bias

| Bias type                                                 | Low risk (score=2)                                                                                                                                                                          | Moderate risk (score=1)                                                                                                                                                                                                                                                                                              | High risk (score=0)                                                                                                                                          |
|-----------------------------------------------------------|---------------------------------------------------------------------------------------------------------------------------------------------------------------------------------------------|----------------------------------------------------------------------------------------------------------------------------------------------------------------------------------------------------------------------------------------------------------------------------------------------------------------------|--------------------------------------------------------------------------------------------------------------------------------------------------------------|
| Selection (sample population)                             | <p>1) Sample from the general population, not a select group;</p> <p>2) Consecutive unselected population;</p> <p>3) Rationale for case and control selection explained.</p>                | <p>1) Sample selected from large population but selection criteria not defined;</p> <p>2) Sample selection ambiguous but may be representative;</p> <p>3) Rationale for cases and controls not explained;</p> <p>4) Eligibility criteria not explained;</p> <p>5) Analysis to adjust for sampling strategy bias.</p> | <p>1) Highly select population making it difficult to generalise finding;</p> <p>2) Sample selection ambiguous and sample unlikely to be representative.</p> |
| Selection (sample size)                                   | <p>1) Sample size calculation performed and adequate.</p>                                                                                                                                   | <p>1) Sample size calculation performed and reasons for not meeting sample size given;</p> <p>2) Sample size calculation not performed but all eligible persons studied.</p>                                                                                                                                         | <p>1) Sample size estimation unclear or only sub-sample studied.</p>                                                                                         |
| Selection (participation)                                 | <p>1) High response rate (&gt;85%).</p>                                                                                                                                                     | <p>1) Moderate response rate (70-85%).</p>                                                                                                                                                                                                                                                                           | <p>1) Low response rate (&lt;70%);</p> <p>2) Response rate not reported.</p>                                                                                 |
| Performance bias (outcome assessment)                     | <p>1) Assessment from independent objective assessment or individual secure records;</p> <p>2) Assessment from administrative database or register (hospital record or linkage record).</p> | <p>1) Assessment from self-report</p>                                                                                                                                                                                                                                                                                | <p>1) Assessment from non-validated data or generic estimate from the overall population.</p>                                                                |
| Performance bias (analytical methods to control for bias) | <p>1) Analysis appropriate for the type of sample (subgroup analysis / regression etc.).</p>                                                                                                | <p>1) Analysis does not account for common adjustment.</p>                                                                                                                                                                                                                                                           | <p>1) Data confusing.</p>                                                                                                                                    |



**Table S4** Univariable and multivariable meta-regression models of cluster-level factors related to the adherence rate of cervical cancer screening (logit form)

| Moderator                                          |            | No. of studies | No. of data points | $\beta^b$ | 95 % CI            | P value |
|----------------------------------------------------|------------|----------------|--------------------|-----------|--------------------|---------|
| Age (per year increase)                            |            | 87             | 327                | -0.0070   | (-0.0072, -0.0068) | <0.0001 |
| Year investigated (per year increase) <sup>a</sup> |            | 87             | 327                | 0.0427    | (0.0419, 0.0436)   | <0.0001 |
| SDI (per 1% increase) <sup>a</sup>                 |            | 87             | 327                | 0.1014    | (0.0990, 0.1038)   | <0.0001 |
| Area <sup>a</sup>                                  |            | 87             |                    |           |                    |         |
|                                                    | Other      |                | 283                | Reference |                    |         |
|                                                    | Urban      |                | 7                  | 0.1487    | (0.0960, 0.2014)   | <0.0001 |
|                                                    | Rural      |                | 37                 | -1.0555   | (-1.0919, -1.0190) | <0.0001 |
| WHO Region <sup>a</sup>                            |            | 87             |                    |           |                    |         |
|                                                    | EUR        |                | 92                 | Reference |                    |         |
|                                                    | AMR        |                | 160                | 0.5669    | (-0.2249, 1.3586)  | 0.1605  |
|                                                    | WPR & SEAR |                | 75                 | -0.5198   | (-1.2091, 0.1695)  | 0.1394  |

Abbreviations: AMR, Region of the Americas; CI, confidence interval; EUR, European Region; SDI, Socio-demographic Index;

SEAR, South-East Asia Region; WHO, World Health Organization; WPR, Western Pacific Region.

<sup>a</sup> adjusted for age; <sup>b</sup> coefficients represent log odds ratios (ORs).

**Table S5** Reference list of the included studies

| Study ID | Reference                                                                                                                                                                                                                                           |
|----------|-----------------------------------------------------------------------------------------------------------------------------------------------------------------------------------------------------------------------------------------------------|
| 1        | Cohen MM, Roos NP, MacWilliam L, Wajda A. Assessing physicians' compliance with guidelines for Papanicolaou testing. <i>Med Care</i> . Jun 1992;30(6):514-28. doi:10.1097/00005650-199206000-00005.                                                 |
| 2        | Lantz PM, Weigers ME, House JS. Education and income differentials in breast and cervical cancer screening. Policy implications for rural women. <i>Med Care</i> . Mar 1997;35(3):219-36. doi:10.1097/00005650-199703000-00004.                     |
| 3        | Risendal B, DeZapien J, Fowler B, Papenfuss M, Giuliano A. Pap smear screening among urban Southwestern American Indian women. <i>Prev Med</i> . Dec 1999;29(6 Pt 1):510-8. doi:10.1006/pmed.1999.0565.                                             |
| 4        | Fernandez ME, DeBor M, Candreia MJ, Wagner AK, Stewart KR. Evaluation of ENCOREplus. A community-based breast and cervical cancer screening program. <i>Am J Prev Med</i> . Apr 1999;16(3 Suppl):35-49. doi:10.1016/s0749-3797(98)00145-7.          |
| 5        | Rohlf's I, Borrell C, Pazarin MI, Plasencia A. The role of sociodemographic factors in preventive practices - The case of cervical and breast cancer. <i>Eur J Public Health</i> . Dec 1999;9(4):278-284. doi:DOI 10.1093/eurpub/9.4.278.           |
| 6        | Taylor VM, Schwartz SM, Jackson JC, et al. Cervical cancer screening among Cambodian-American women. <i>Cancer Epidemiol Biomarkers Prev</i> . Jun 1999;8(6):541-6.                                                                                 |
| 7        | Maxwell AE, Bastani R, Warda US. Demographic predictors of cancer screening among Filipino and Korean immigrants in the United States. <i>Am J Prev Med</i> . Jan 2000;18(1):62-8. doi:10.1016/s0749-3797(99)00110-5.                               |
| 8        | Ramirez AG, Suarez L, McAlister A, et al. Cervical cancer screening in regional Hispanic populations. <i>Am J Health Behav</i> . May-Jun 2000;24(3):181-192. doi:Doi 10.5993/Ajhb.24.3.3.                                                           |
| 9        | Maxwell CJ, Bancej CM, Snider J, Vik SA. Factors important in promoting cervical cancer screening among Canadian women: findings from the 1996-97 National Population Health Survey (NPHS). <i>Can J Public Health</i> . Mar-Apr 2001;92(2):127-33. |
| 10       | Do HH, Taylor VM, Yasui Y, Jackson JC, Tu SP. Cervical cancer screening among Chinese immigrants in Seattle, Washington. <i>J Immigr Health</i> . Jan 2001;3(1):15-21. doi:10.1023/A:1026606401164.                                                 |
| 11       | Jirojwong S, MacLennan R, Manderson L. Health beliefs and Pap smears among Thai women in Brisbane, Australia. <i>Asia Pac J Public Health</i> . 2001;13(1):20-3. doi:10.1177/101053950101300105.                                                    |
| 12       | Lee J, Seow A, Ling SL, Peng LH. Improving adherence to regular pap smear screening among Asian women: a population-based study in Singapore. <i>Health Educ Behav</i> . Apr 2002;29(2):207-18. doi:10.1177/109019810202900206.                     |
| 13       | Cyrus-David MS, Michielutte R, Paskett ED, D'Agostino R, Jr., Goff D. Cervical cancer risk as a predictor of Pap smear use in rural North Carolina. <i>J Rural Health</i> . Winter 2002;18(1):67-76. doi:10.1111/j.1748-0361.2002.tb00878.x.        |
| 14       | Amonkar MM, Madhavan S. Compliance rates and predictors of cancer screening recommendations among Appalachian women. <i>J Health Care Poor Underserved</i> . Nov 2002;13(4):443-60. doi:10.1353/hpu.2010.0582.                                      |
| 15       | Fernandez-Esquer ME, Espinoza P, Ramirez AG, McAlister AL. Repeated Pap smear screening among Mexican-American women. <i>Health Educ Res</i> . Aug 2003;18(4):477-87. doi:10.1093/her/cyf037.                                                       |

| Study ID | Reference                                                                                                                                                                                                                                                            |
|----------|----------------------------------------------------------------------------------------------------------------------------------------------------------------------------------------------------------------------------------------------------------------------|
| 16       | Selvin E, Brett KM. Breast and cervical cancer screening: sociodemographic predictors among White, Black, and Hispanic women. <i>Am J Public Health</i> . Apr 2003;93(4):618-23. doi:10.2105/ajph.93.4.618.                                                          |
| 17       | Juon HS, Seung-Lee C, Klassen AC. Predictors of regular Pap smears among Korean-American women. <i>Prev Med</i> . Dec 2003;37(6 Pt 1):585-92. doi:10.1016/j.ypped.2003.09.006.                                                                                       |
| 18       | Miedema BB, Tatemichi S. Breast and cervical cancer screening for women between 50 and 69 years of age: what prompts women to screen? <i>Womens Health Issues</i> . Sep-Oct 2003;13(5):180-4. doi:10.1016/s1049-3867(03)00039-2.                                     |
| 19       | Hou SI, Fernandez ME, Baumler E, Parcel GS, Chen PH. Correlates of cervical cancer screening among women in Taiwan. <i>Health Care Women Int</i> . May-Jun 2003;24(5):384-98. doi:10.1080/07399330390212171.                                                         |
| 20       | Luengo Matos S, Munoz van den Eynde A. Use of pap smear for cervical cancer screening and factors related with its use in Spain. <i>Aten Primaria</i> . Mar 31 2004;33(5):229-34. doi:10.1016/s0212-6567(04)79407-x.                                                 |
| 21       | Taylor VM, Yasui Y, Burke N, et al. Pap testing adherence among Vietnamese American women. <i>Cancer Epidemiol Biomarkers Prev</i> . Apr 2004;13(4):613-9.                                                                                                           |
| 22       | Coronado GD, Thompson B, Koepsell TD, Schwartz SM, McLerran D. Use of Pap test among Hispanics and non-Hispanic whites in a rural setting. <i>Prev Med</i> . Jun 2004;38(6):713-22. doi:10.1016/j.ypped.2004.01.009.                                                 |
| 23       | Insinga RP, Glass AG, Rush BB. Pap screening in a U.S. health plan. <i>Cancer Epidemiol Biomarkers Prev</i> . Mar 2004;13(3):355-60.                                                                                                                                 |
| 24       | Dettenborn L, DuHamel K, Butts G, Thompson H, Jandorf L. Cancer fatalism and its demographic correlates among African American and Hispanic women: Effects on adherence to cancer screening. <i>J Psychosoc Oncol</i> . 2004;22(4):47-60. doi:10.1300/J077v22n04_03. |
| 25       | Borrayo EA, Thomas JJ, Lawsin C. Cervical cancer screening among Latinas: the importance of referral and participation in parallel cancer screening behaviors. <i>Women Health</i> . 2004;39(2):13-29. doi:10.1300/J013v39n02_02.                                    |
| 26       | Bazargan M, Bazargan SH, Farooq M, Baker RS. Correlates of cervical cancer screening among underserved Hispanic and African-American women. <i>Prev Med</i> . Sep 2004;39(3):465-73. doi:10.1016/j.ypped.2004.05.003                                                 |
| 27       | Cho IS, Park YS. A study on regular cervical cancer screening behavior among middle-aged women. <i>Taehan Kanho Hakhoe Chi</i> . Feb 2004;34(1):141-9. doi:10.4040/jkan.2004.34.1.141.                                                                               |
| 28       | Hoyo C, Yarnall KS, Skinner CS, Moorman PG, Sellers D, Reid L. Pain predicts non-adherence to pap smear screening among middle-aged African American women. <i>Prev Med</i> . Aug 2005;41(2):439-45. doi:10.1016/j.ypped.2004.11.021.                                |
| 29       | De Alba I, Ngo-Metzger Q, Sweningson JM, Hubbell FA. Pap smear use in California: are we closing the racial/ethnic gap? <i>Prev Med</i> . Jun 2005;40(6):747-55. doi:10.1016/j.ypped.2004.09.018.                                                                    |
| 30       | Kwak MS, Park EC, Bang JY, Sung NY, Lee JY, Choi KS. Factors associated with cancer screening participation, Korea. <i>J Prev Med Public Health</i> . Nov 2005;38(4):473-81.                                                                                         |
| 31       | Giorgi Rossi P, Esposito G, Brezzi S, Brachini A, Raggi P, Federici A. Estimation of Pap-test coverage in an area with an organised screening program: challenges for survey methods. <i>BMC Health Serv Res</i> . Mar 17 2006;6:36. doi:10.1186/1472-6963-6-36.     |

| Study ID | Reference                                                                                                                                                                                                                                                                                           |
|----------|-----------------------------------------------------------------------------------------------------------------------------------------------------------------------------------------------------------------------------------------------------------------------------------------------------|
| 32       | Carruth AK, Browning S, Reed DB, Skarke L, Sealey L. The impact of farm lifestyle and health characteristics: cervical cancer screening among southern farmwomen. <i>Nurs Res.</i> Mar-Apr 2006;55(2):121-7. doi:10.1097/00006199-200603000-00007.                                                  |
| 33       | Liao CC, Wang HY, Lin RS, Hsieh CY, Sung FC. Addressing Taiwan's high incidence of cervical cancer: factors associated with the Nation's low compliance with Papanicolaou screening in Taiwan. <i>Public Health.</i> Dec 2006;120(12):1170-6. doi:10.1016/j.puhe.2006.07.028.                       |
| 34       | Lee-Lin F, Pett M, Menon U, et al. Cervical cancer beliefs and pap test screening practices among Chinese American immigrants. <i>Oncol Nurs Forum.</i> Nov 2007;34(6):1203-9. doi:10.1188/07.ONF.1203-1209.                                                                                        |
| 35       | Chen LS, Huang N, Tsay JH, et al. Screening for cervical cancer among female physicians and their relatives in Taiwan: a population-based comparative study. <i>Prev Med.</i> Jun 2007;44(6):531-5. doi:10.1016/j.ypmed.2007.02.001.                                                                |
| 36       | Gao W, Desouza R, Paterson J, Lu T. Factors affecting uptake of cervical cancer screening among Chinese women in New Zealand. <i>Int J Gynaecol Obstet.</i> Oct 2008;103(1):76-82. doi:10.1016/j.ijgo.2008.04.025.                                                                                  |
| 37       | Tsui J, Tanjasiri SP. Cervical cancer screening among Thai women in Northern California. <i>J Womens Health (Larchmt).</i> Apr 2008;17(3):393-401. doi:10.1089/jwh.2007.0427.                                                                                                                       |
| 38       | Puig-Tintore LM, Castellsague X, Torne A, et al. Coverage and factors associated with cervical cancer screening: results from the AFRODITA study: a population-based survey in Spain. <i>J Low Genit Tract Dis.</i> Apr 2008;12(2):82-9. doi:10.1097/LGT.0b013e3181599c16.                          |
| 39       | Ginde AA, Millen JC, Love JS, Pang JM, Camargo CA, Jr. Compliance with recommended cancer screening among emergency department patients: a multicenter survey. <i>Acad Emerg Med.</i> May 2008;15(5):483-6. doi:10.1111/j.1553-2712.2008.00103.x.                                                   |
| 40       | Tung WC, Nguyen DH, Tran DN. Applying the transtheoretical model to cervical cancer screening in Vietnamese-American women. <i>Int Nurs Rev.</i> Mar 2008;55(1):73-80. doi:10.1111/j.1466-7657.2007.00602.x.                                                                                        |
| 41       | Nelson W, Moser RP, Gaffey A, Waldron W. Adherence to cervical cancer screening guidelines for U.S. women aged 25-64: data from the 2005 Health Information National Trends Survey (HINTS). <i>J Womens Health (Larchmt).</i> Nov 2009;18(11):1759-68. doi:10.1089/jwh.2009.1430.                   |
| 42       | Ma GX, Toubbeh JI, Wang MQ, Shive SE, Cooper L, Pham A. Factors associated with cervical cancer screening compliance and noncompliance among Chinese, Korean, Vietnamese, and Cambodian women. <i>J Natl Med Assoc.</i> Jun 2009;101(6):541-51. doi:10.1016/s0027-9684(15)30939-1.                  |
| 43       | Dimitrakaki C, Boulamatsis D, Mariolis A, Kontodimopoulos N, Niakas D, Tountas Y. Use of cancer screening services in Greece and associated social factors: results from the nation-wide Hellas Health I survey. <i>Eur J Cancer Prev.</i> Jun 2009;18(3):248-57. doi:10.1097/CEJ.0b013e32832405d6. |
| 44       | Amankwah E, Ngwakongnwi E, Quan H. Why many visible minority women in Canada do not participate in cervical cancer screening. <i>Ethn Health.</i> Aug 2009;14(4):337-49. doi:10.1080/13557850802699122.                                                                                             |
| 45       | Taylor VM, Yasui Y, Nguyen TT, et al. Pap smear receipt among Vietnamese immigrants: the importance of health care factors. <i>Ethn Health.</i> Dec 2009;14(6):575-89. doi:10.1080/13557850903111589.                                                                                               |

| Study ID | Reference                                                                                                                                                                                                                                                                                                                                                   |
|----------|-------------------------------------------------------------------------------------------------------------------------------------------------------------------------------------------------------------------------------------------------------------------------------------------------------------------------------------------------------------|
| 46       | YG S, SM Z, XP D, et al. Investigation on cervical cancer screening of women in Yuetan community (月坛社区妇女宫颈癌筛查状况调查). Chinese General Practice (中国全科医学). 2009;12:2092-2093.                                                                                                                                                                                   |
| 47       | Martin-Lopez R, Hernandez-Barrera V, De Andres AL, Garrido PC, De Miguel AG, Garcia RJ. Breast and cervical cancer screening in Spain and predictors of adherence. Eur J Cancer Prev. May 2010;19(3):239-45. doi:10.1097/CEJ.0b013e3283372125.                                                                                                              |
| 48       | Zhou J, Enewold L, Peoples GE, et al. Trends in cancer screening among Hispanic and white non-Hispanic women, 2000-2005. J Womens Health (Larchmt). Dec 2010;19(12):2167-74. doi:10.1089/jwh.2009.1909.                                                                                                                                                     |
| 49       | Byrne MM, Davila EP, Zhao W, et al. Cancer screening behaviors among smokers and non-smokers. Cancer Epidemiol. Oct 2010;34(5):611-7. doi:10.1016/j.canep.2010.06.017.                                                                                                                                                                                      |
| 50       | Lopez-de-Andres A, Martin-Lopez R, Hernandez-Barrera V, et al. Predictors of breast and cervical cancer screening in a Spanish metropolitan area. J Womens Health (Larchmt). Sep 2010;19(9):1675-81. doi:10.1089/jwh.2009.1828.                                                                                                                             |
| 51       | Lim JW. Linguistic and ethnic disparities in breast and cervical cancer screening and health risk behaviors among Latina and Asian American women. J Womens Health (Larchmt). Jun 2010;19(6):1097-107. doi:10.1089/jwh.2009.1614.                                                                                                                           |
| 52       | Paskett ED, McLaughlin JM, Reiter PL, et al. Psychosocial predictors of adherence to risk-appropriate cervical cancer screening guidelines: a cross sectional study of women in Ohio Appalachia participating in the Community Awareness Resources and Education (CARE) project. Prev Med. Jan-Feb 2010;50(1-2):74-80. doi:10.1016/j.ypmed.2009.09.001.     |
| 53       | Lee K, Lim HT, Hwang SS, Chae DW, Park SM. Socio-economic disparities in behavioural risk factors for cancer and use of cancer screening services in Korean adults aged 30 years and older: the Third Korean National Health and Nutrition Examination Survey, 2005 (KNHANES III). Public Health. Dec 2010;124(12):698-704. doi:10.1016/j.puhe.2010.07.004. |
| 54       | RL M, WJ M, YJ X, et al. Screening rates of cervical cancer breast cancer and their influential factors in Guangdong Province (广东省妇女乳腺癌和宫颈癌筛查率及相关影响因素分析). South China Journal of Preventive Medicine (华南预防医学). 2010;36:8-10, 14.                                                                                                                            |
| 55       | CF W, Y Z, K G, et al. Coverage of Pap Smear Screening among Women in Shanghai and Its Influencing Factors (上海地区女性宫颈脱落细胞筛查工作的实施及其影响因素). Journal of Environmental & Occupational Medicine (环境与职业医学). 2010;27(06):337-341.                                                                                                                                    |
| 56       | Lawsin C, Erwin D, Bursac Z, Jandorf L. Heterogeneity in breast and cervical cancer screening practices among female Hispanic immigrants in the United States. J Immigr Minor Health. Oct 2011;13(5):834-41. doi:10.1007/s10903-010-9378-9.                                                                                                                 |
| 57       | Cheung NW, Li S, Tang KC. Participation in cardiovascular risk factor and cancer screening among Australian Chinese. Health Promot J Austr. Aug 2011;22(2):147-52. doi:10.1071/he11147.                                                                                                                                                                     |

| Study ID | Reference                                                                                                                                                                                                                                                                                                                                              |
|----------|--------------------------------------------------------------------------------------------------------------------------------------------------------------------------------------------------------------------------------------------------------------------------------------------------------------------------------------------------------|
| 58       | Pons-Vigues M, Puigpinos-Riera R, Rodriguez-Sanz M, Serral G, Palencia L, Borrell C. Preventive control of breast and cervical cancer in immigrant and native women in Spain: the role of country of origin and social class. <i>Int J Health Serv.</i> 2011;41(3):483-99. doi:10.2190/HS.41.3.e.                                                      |
| 59       | Tekkel M, Veideman T, Rahu M. Use of mammography, Pap test and prostate examination by body mass index during the developmental period of cancer screening in Estonia. <i>Public Health.</i> Oct 2011;125(10):697-703. doi:10.1016/j.puhe.2011.06.013.                                                                                                 |
| 60       | Nuno T, Castle PE, Harris R, Estrada A, Garcia F, Yuma Project Technical T. Breast and cervical cancer screening utilization among Hispanic women living near the United States-Mexico border. <i>J Womens Health (Larchmt).</i> May 2011;20(5):685-93. doi:10.1089/jwh.2010.2205.                                                                     |
| 61       | Hansen BT, Hukkelberg SS, Haldorsen T, Eriksen T, Skare GB, Nygard M. Factors associated with non-attendance, opportunistic attendance and reminded attendance to cervical screening in an organized screening program: a cross-sectional study of 12,058 Norwegian women. <i>BMC Public Health.</i> Apr 26 2011;11:264. doi:10.1186/1471-2458-11-264. |
| 62       | MacLaughlan SD, Lachance JA, Gjelsvik A. Correlation between smoking status and cervical cancer screening: a cross-sectional study. <i>J Low Genit Tract Dis.</i> Apr 2011;15(2):114-9. doi:10.1097/LGT.0b013e3181f58d0d.                                                                                                                              |
| 63       | Vakfari A, Gavana M, Giannakopoulos S, Smyrnakis E, Benos A. Participation rates in cervical cancer screening: experience in rural Northern Greece. <i>Hippokratia.</i> Oct 2011;15(4):346-52.                                                                                                                                                         |
| 64       | Acikgoz A, Ergor G. Cervical cancer risk levels in Turkey and compliance to the national cervical cancer screening standard. <i>Asian Pac J Cancer Prev.</i> 2011;12(4):923-7.                                                                                                                                                                         |
| 65       | Lee M, Chang HS, Park EC, Yu SH, Sohn M, Lee SG. Factors associated with participation of Korean women in cervical cancer screening examination by age group. <i>Asian Pac J Cancer Prev.</i> 2011;12(6):1457-62.                                                                                                                                      |
| 66       | Q L, X Q, L W, et al. Study on determinants of cervical cancer screening service utilization in urban communities in Shanghai,China (上海市社区宫颈癌筛查服务利用影响因素研究). <i>Chinese Health Resources (中国卫生资源).</i> 2011;14(02):111-113.                                                                                                                             |
| 67       | Nguyen-Truong CK, Lee-Lin F, Leo MC, et al. A community-based participatory research approach to understanding pap testing adherence among Vietnamese American immigrants. <i>J Obstet Gynecol Neonatal Nurs.</i> Nov-Dec 2012;41(6):E26-40. doi:10.1111/j.1552-6909.2012.01414.x.                                                                     |
| 68       | Worthington C, McLeish K, Fuller-Thomson E. Adherence over time to cervical cancer screening guidelines: insights from the Canadian National Population Health Survey. <i>J Womens Health (Larchmt).</i> Feb 2012;21(2):199-208. doi:10.1089/jwh.2010.2090.                                                                                            |
| 69       | Gonzalez P, Castaneda SF, Mills PJ, Talavera GA, Elder JP, Gallo LC. Determinants of breast, cervical and colorectal cancer screening adherence in Mexican-American women. <i>J Community Health.</i> Apr 2012;37(2):421-33. doi:10.1007/s10900-011-9459-2.                                                                                            |
| 70       | Damiani G, Federico B, Basso D, et al. Socioeconomic disparities in the uptake of breast and cervical cancer screening in Italy: a cross sectional study. <i>BMC Public Health.</i> Feb 3 2012;12:99. doi:10.1186/1471-2458-12-99.                                                                                                                     |

| Study ID | Reference                                                                                                                                                                                                                                                                                                      |
|----------|----------------------------------------------------------------------------------------------------------------------------------------------------------------------------------------------------------------------------------------------------------------------------------------------------------------|
| 71       | Martin-Lopez R, Hernandez-Barrera V, de Andres AL, Carrasco-Garrido P, de Miguel AG, Jimenez-Garcia R. Trend in cervical cancer screening in Spain (2003-2009) and predictors of adherence. <i>Eur J Cancer Prev.</i> Jan 2012;21(1):82-8. doi:10.1097/CEJ.0b013e32834a7e46.                                   |
| 72       | Muus KJ, Baker-Demaray TB, Bogart TA, et al. Physical activity and cervical cancer testing among American Indian women. <i>J Rural Health.</i> Summer 2012;28(3):320-6. doi:10.1111/j.1748-0361.2011.00394.x.                                                                                                  |
| 73       | Olesen SC, Butterworth P, Jacomb P, Tait RJ. Personal factors influence use of cervical cancer screening services: epidemiological survey and linked administrative data address the limitations of previous research. <i>BMC Health Serv Res.</i> Feb 14 2012;12:34. doi:10.1186/1472-6963-12-34.             |
| 74       | Macedo A, Waller J, Patnick J, Marlow L. Cervical screening uptake, political interest and voter turnout: a population-based survey of women in England. <i>J Med Screen.</i> Dec 2012;19(4):189-94. doi:10.1258/jms.2012.012073.                                                                              |
| 75       | Ko KD, Park SM, Lee K. Factors associated with the use of uterine cervical cancer screening services in Korean elderly women. <i>Korean J Fam Med.</i> May 2012;33(3):174-81. doi:10.4082/kjfm.2012.33.3.174.                                                                                                  |
| 76       | Azerkan F, Sparen P, Sandin S, Tillgren P, Faxelid E, Zendejdel K. Cervical screening participation and risk among Swedish-born and immigrant women in Sweden. <i>Int J Cancer.</i> Feb 15 2012;130(4):937-47. doi:10.1002/ijc.26084.                                                                          |
| 77       | Aminisani N, Armstrong BK, Canfell K. Cervical cancer screening in Middle Eastern and Asian migrants to Australia: a record linkage study. <i>Cancer Epidemiol.</i> Dec 2012;36(6):e394-400. doi:10.1016/j.canep.2012.08.009.                                                                                  |
| 78       | Nuno T, Gerald JK, Harris R, Martinez ME, Estrada A, Garcia F. Comparison of breast and cervical cancer screening utilization among rural and urban Hispanic and American Indian women in the Southwestern United States. <i>Cancer Causes Control.</i> Aug 2012;23(8):1333-41. doi:10.1007/s10552-012-0012-0. |
| 79       | Shelton RC, Jandorf L, King S, Thelemaque L, Erwin DO. Cervical cancer screening among immigrant Hispanics: an analysis by country of origin. <i>J Immigr Minor Health.</i> Aug 2012;14(4):715-20. doi:10.1007/s10903-011-9541-y.                                                                              |
| 80       | Ashok M, Berkowitz Z, Hawkins NA, Tangka F, Saraiya M. Recency of Pap testing and future testing plans among women aged 18-64: analysis of the 2007 Health Information National Trends Survey. <i>J Womens Health (Larchmt).</i> Jul 2012;21(7):705-12. doi:10.1089/jwh.2012.3562.                             |
| 81       | Leone LA, Allicock M, Pignone MP, Johnson LS, Walsh JF, Campbell MK. Cancer screening patterns by weight group and gender for urban African American church members. <i>J Community Health.</i> Apr 2012;37(2):299-306. doi:10.1007/s10900-011-9445-8.                                                         |
| 82       | Shippee ND, Mullan RJ, Nabhan M, et al. Adherence to preventive recommendations: experience of a cohort presenting for executive health care. <i>Popul Health Manag.</i> Apr 2012;15(2):65-70. doi:10.1089/pop.2011.0029.                                                                                      |
| 83       | Aminisani N, Armstrong BK, Canfell K. Participation in cervical screening by older Asian and Middle Eastern migrants in New South Wales, Australia. <i>Health Promot Perspect.</i> 2012;2(2):274-86. doi:10.5681/hpp.2012.033.                                                                                 |
| 84       | Raz R, Shavit O, Stein M, et al. Uptake of Pap smears among women in a large Israeli HMO between 2006 and 2008. <i>Public Health.</i> Jul 2012;126(7):594-9. doi:10.1016/j.puhe.2012.04.005.                                                                                                                   |
| 85       | Borges MF, Dotto LM, Koifman RJ, Cunha Mde A, Muniz PT. Prevalence of uterine cervical cancer testing in Rio Branco, Acre State, Brazil, and factors associated with non-participation in screening. <i>Cad Saude Publica.</i> Jun 2012;28(6):1156-66. doi:10.1590/s0102-311x2012000600014.                    |

| Study ID | Reference                                                                                                                                                                                                                                                                                           |
|----------|-----------------------------------------------------------------------------------------------------------------------------------------------------------------------------------------------------------------------------------------------------------------------------------------------------|
| 86       | Almeida CM, Rodriguez MA, Skootsky S, Pregler J, Steers N, Wenger NS. Cervical cancer screening overuse and underuse: patient and physician factors. <i>Am J Manag Care</i> . Jun 2013;19(6):482-9.                                                                                                 |
| 87       | Morrison TB, Flynn PM, Weaver AL, Wieland ML. Cervical cancer screening adherence among Somali immigrants and refugees to the United States. <i>Health Care Women Int</i> . 2013;34(11):980-8. doi:10.1080/07399332.2013.770002.                                                                    |
| 88       | Oussaid N, Lutringer-Magnin D, Barone G, Haesebaert J, Lasset C. Factors associated with Pap smear screening among French women visiting a general practitioner in the Rhone-Alpes region. <i>Rev Epidemiol Sante Publique</i> . Oct 2013;61(5):437-45. doi:10.1016/j.respe.2013.04.009.            |
| 89       | Cerigo H, Coutlee F, Franco EL, Brassard P. Factors associated with cervical cancer screening uptake among Inuit women in Nunavik, Quebec, Canada. <i>BMC Public Health</i> . May 3 2013;13:438. doi:10.1186/1471-2458-13-438.                                                                      |
| 90       | Augusto EF, Rosa ML, Cavalcanti SM, Oliveira LH. Barriers to cervical cancer screening in women attending the Family Medical Program in Niteroi, Rio de Janeiro. <i>Arch Gynecol Obstet</i> . Jan 2013;287(1):53-8. doi:10.1007/s00404-012-2511-3.                                                  |
| 91       | Khadilkar A, Chen Y. Rate of cervical cancer screening associated with immigration status and number of years since immigration in Ontario, Canada. <i>J Immigr Minor Health</i> . Apr 2013;15(2):244-8. doi:10.1007/s10903-012-9711-6.                                                             |
| 92       | Lee M, Park EC, Chang HS, Kwon JA, Yoo KB, Kim TH. Socioeconomic disparity in cervical cancer screening among Korean women: 1998-2010. <i>BMC Public Health</i> . Jun 6 2013;13:553. doi:10.1186/1471-2458-13-553.                                                                                  |
| 93       | Suh M, Choi KS, Lee YY, Park B, Jun JK. Cancer screening in Korea, 2012: results from the Korean National Cancer Screening Survey. <i>Asian Pac J Cancer Prev</i> . 2013;14(11):6459-63. doi:10.7314/apjcp.2013.14.11.6459.                                                                         |
| 94       | Hernandez CM, Wallace D. A profile of Mexican-born women who adhere to national cervical cancer screening recommendations. <i>J Community Health Nurs</i> . 2014;31(3):157-66. doi:10.1080/07370016.2014.926678.                                                                                    |
| 95       | Tsai RJ, Luckhaupt SE, Sweeney MH, Calvert GM. Shift work and cancer screening: do females who work alternative shifts undergo recommended cancer screening? <i>Am J Ind Med</i> . Mar 2014;57(3):265-75. doi:10.1002/ajim.22285.                                                                   |
| 96       | Adonis L, Basu D, Luiz J. Predictors of adherence to screening guidelines for chronic diseases of lifestyle, cancers, and HIV in a health-insured population in South Africa. <i>Glob Health Action</i> . 2014;7:23807. doi:10.3402/gha.v7.23807.                                                   |
| 97       | Moudatsou MM, Kritsotakis G, Alegakis AK, Koutis A, Philalithis AE. Social capital and adherence to cervical and breast cancer screening guidelines: a cross-sectional study in rural Crete. <i>Health Soc Care Community</i> . Jul 2014;22(4):395-404. doi:10.1111/hsc.12096.                      |
| 98       | Kristensson JH, Sander BB, von Euler-Chelpin M, Lynge E. Predictors of non-participation in cervical screening in Denmark. <i>Cancer Epidemiol</i> . Apr 2014;38(2):174-80. doi:10.1016/j.canep.2013.12.007.                                                                                        |
| 99       | Arbyn M, Fabri V, Temmerman M, Simoons C. Attendance at cervical cancer screening and use of diagnostic and therapeutic procedures on the uterine cervix assessed from individual health insurance data (Belgium, 2002-2006). <i>PLoS One</i> . 2014;9(4):e92615. doi:10.1371/journal.pone.0092615. |
| 100      | Calo WA. Place matters: Associations between contextual characteristics and health. <i>The University of Texas School of Public Health</i> ; 2014.                                                                                                                                                  |



| Study ID | Reference                                                                                                                                                                                                                                                                                          |
|----------|----------------------------------------------------------------------------------------------------------------------------------------------------------------------------------------------------------------------------------------------------------------------------------------------------|
| 101      | Documet P, Bear TM, Flatt JD, Macia L, Trauth J, Ricci EM. The association of social support and education with breast and cervical cancer screening. <i>Health Educ Behav.</i> Feb 2015;42(1):55-64. doi:10.1177/1090198114557124.                                                                |
| 102      | Guo F, Hirth JM, Berenson AB. Effects of Cardiovascular Disease on Compliance with Cervical and Breast Cancer Screening Recommendations Among Adult Women. <i>J Womens Health (Larchmt).</i> Aug 2015;24(8):641-7. doi:10.1089/jwh.2014.5129.                                                      |
| 103      | Visanuyothin S, Chompikul J, Mongkolchati A. Determinants of cervical cancer screening adherence in urban areas of Nakhon Ratchasima Province, Thailand. <i>J Infect Public Health.</i> Nov-Dec 2015;8(6):543-52. doi:10.1016/j.jiph.2015.04.018.                                                  |
| 104      | Ricardo-Rodrigues I, Jimenez-Garcia R, Hernandez-Barrera V, Carrasco-Garrido P, Jimenez-Trujillo I, Lopez de Andres A. Social disparities in access to breast and cervical cancer screening by women living in Spain. <i>Public Health.</i> Jul 2015;129(7):881-8. doi:10.1016/j.puhe.2015.02.021. |
| 105      | Miranda-Diaz C, Betancourt E, Ruiz-Candelaria Y, Hunter-Mellado RF. Barriers for Compliance to Breast, Colorectal, and Cervical Screening Cancer Tests among Hispanic Patients. <i>Int J Environ Res Public Health.</i> Dec 22 2015;13(1):ijerph13010021. doi:10.3390/ijerph13010021.              |
| 106      | Gyulai A, Nagy A, Pataki V, Tonte D, Adany R, Voko Z. Survey of Participation in Organised Cervical Cancer-Screening Programme in Hungary. <i>Cent Eur J Public Health.</i> Dec 2015;23(4):360-4. doi:10.21101/cejph.a4068.                                                                        |
| 107      | Richard A, Rohrmann S, Schmid SM, et al. Lifestyle and health-related predictors of cervical cancer screening attendance in a Swiss population-based study. <i>Cancer Epidemiol.</i> Dec 2015;39(6):870-6. doi:10.1016/j.canep.2015.09.009.                                                        |
| 108      | Schoofs J, Krijger K, Vandevoorde J, Rossem IV, Devroey D. Health-related factors associated with the participation in cervical cancer screening. <i>J Res Health Sci.</i> Winter 2015;15(1):11-6.                                                                                                 |
| 109      | Ostensson E, Alder S, Elfstrom KM, et al. Barriers to and facilitators of compliance with clinic-based cervical cancer screening: population-based cohort study of women aged 23-60 years. <i>PLoS One.</i> 2015;10(5):e0128270. doi:10.1371/journal.pone.0128270.                                 |
| 110      | Barbadoro P, Ricciardi A, Di Tondo E, Vallorani S, Mazzarini G, Prospero E. Utilization patterns of cervical cancer screening in Italy. <i>Eur J Cancer Prev.</i> Mar 2015;24(2):135-40. doi:10.1097/CEJ.0000000000000068.                                                                         |
| 111      | MX D, LH R, HJ W, et al. Cervical cancer screening service utilization and its determinants among rural women. (农村适龄妇女宫颈癌筛查服务利用行为现状及其影响因素分析). <i>Modern Preventive Medicine (现代预防医学).</i> 2015;42:1604-1606.                                                                                       |
| 112      | Hirth JM, Laz TH, Rahman M, Berenson AB. Racial/Ethnic Differences Affecting Adherence to Cancer Screening Guidelines Among Women. <i>J Womens Health (Larchmt).</i> Apr 2016;25(4):371-80. doi:10.1089/jwh.2015.5270.                                                                             |
| 113      | Crawford A, Benard V, King J, Thomas CC. Understanding Barriers to Cervical Cancer Screening in Women With Access to Care, Behavioral Risk Factor Surveillance System, 2014. <i>Prev Chronic Dis.</i> Nov 10 2016;13:E154. doi:10.5888/pcd13.160225.                                               |

| Study ID | Reference                                                                                                                                                                                                                                                                                                  |
|----------|------------------------------------------------------------------------------------------------------------------------------------------------------------------------------------------------------------------------------------------------------------------------------------------------------------|
| 114      | Shneyderman Y, Rutten LJ, Arheart KL, Byrne MM, Kornfeld J, Schwartz SJ. Health Information Seeking and Cancer Screening Adherence Rates. <i>J Cancer Educ.</i> Mar 2016;31(1):75-83. doi:10.1007/s13187-015-0791-6.                                                                                       |
| 115      | Valdovinos C, Penedo FJ, Isasi CR, et al. Perceived discrimination and cancer screening behaviors in US Hispanics: the Hispanic Community Health Study/Study of Latinos Sociocultural Ancillary Study. <i>Cancer Causes Control.</i> Jan 2016;27(1):27-37. doi:10.1007/s10552-015-0679-0.                  |
| 116      | Urrutia MT, Gajardo M. Factors affecting compliance with pap smear screening. <i>Rev Med Chil.</i> Dec 2016;144(12):1553-1560. doi:10.4067/S0034-98872016001200006.                                                                                                                                        |
| 117      | Bianco A, Larosa E, Pileggi C, Nobile CGA, Pavia M. Cervical and breast cancer screening participation and utilisation of maternal health services: a cross-sectional study among immigrant women in Southern Italy. <i>BMJ Open.</i> Oct 15 2017;7(10):e016306. doi:10.1136/bmjopen-2017-016306.          |
| 118      | Comparetto C, Epifani C, Manca MC, et al. Uptake of cervical cancer screening among the migrant population of Prato Province, Italy. <i>Int J Gynaecol Obstet.</i> Mar 2017;136(3):309-314. doi:10.1002/ijgo.12067.                                                                                        |
| 119      | Parekh N, Donohue JM, Men A, Corbelli J, Jarlenski M. Cervical Cancer Screening Guideline Adherence Before and After Guideline Changes in Pennsylvania Medicaid. <i>Obstet Gynecol.</i> Jan 2017;129(1):66-75. doi:10.1097/AOG.0000000000001804.                                                           |
| 120      | Leinonen MK, Campbell S, Klungsoyr O, Lonnberg S, Hansen BT, Nygard M. Personal and provider level factors influence participation to cervical cancer screening: A retrospective register-based study of 1.3 million women in Norway. <i>Prev Med.</i> Jan 2017;94:31-39. doi:10.1016/j.ypmed.2016.11.018. |
| 121      | White A, Thompson TD, White MC, et al. Cancer Screening Test Use - United States, 2015. <i>MMWR Morb Mortal Wkly Rep.</i> Mar 3 2017;66(8):201-206. doi:10.15585/mmwr.mm6608a1.                                                                                                                            |
| 122      | Tung WC, Granner M, Lu M, Qiu X. Predictors of cervical cancer screening for Chinese American women. <i>Eur J Cancer Care (Engl).</i> Jul 2017;26(4)doi:10.1111/ecc.12552.                                                                                                                                 |
| 123      | Cadet TJ, Burke SL, Stewart K, Howard T, Schonberg M. Cultural and emotional determinants of cervical cancer screening among older Hispanic women. <i>Health Care Women Int.</i> Dec 2017;38(12):1289-1312. doi:10.1080/07399332.2017.1364740.                                                             |
| 124      | Lofters AK, Schuler A, Slater M, et al. Using self-reported data on the social determinants of health in primary care to identify cancer screening disparities: opportunities and challenges. <i>BMC Fam Pract.</i> Feb 28 2017;18(1):31. doi:10.1186/s12875-017-0599-z.                                   |
| 125      | Zorogastua K, Sriphanlop P, Reich A, Aly S, Cisse A, Jandorf L. Breast and Cervical Cancer Screening among US and non US Born African American Muslim Women in New York City. <i>AIMS Public Health.</i> 2017;4(1):78-93. doi:10.3934/publichealth.2017.1.78.                                              |
| 126      | Chang HK, Myong JP, Byun SW, et al. Factors associated with participation in cervical cancer screening among young Koreans: a nationwide cross-sectional study. <i>BMJ Open.</i> Apr 3 2017;7(4):e013868. doi:10.1136/bmjopen-2016-013868.                                                                 |
| 127      | Cofie LE, Hirth JM, Wong R. Chronic comorbidities and cervical cancer screening and adherence among US-born and foreign-born women. <i>Cancer Causes Control.</i> Nov 2018;29(11):1105-1113. doi:10.1007/s10552-018-1084-2.                                                                                |

| Study ID | Reference                                                                                                                                                                                                                                                                  |
|----------|----------------------------------------------------------------------------------------------------------------------------------------------------------------------------------------------------------------------------------------------------------------------------|
| 128      | Luque JS, Tarasenko YN, Chen C. Correlates of Cervical Cancer Screening Adherence Among Women in the U.S.: Findings from HINTS 2013-2014. <i>J Prim Prev.</i> Aug 2018;39(4):329-344. doi:10.1007/s10935-018-0513-z.                                                       |
| 129      | Rendle KA, Schiffman M, Cheung LC, et al. Adherence patterns to extended cervical screening intervals in women undergoing human papillomavirus (HPV) and cytology cotesting. <i>Prev Med.</i> Apr 2018;109:44-50. doi:10.1016/j.ypmed.2017.12.023.                         |
| 130      | Petrelli A, Giorgi Rossi P, Francovich L, et al. Geographical and socioeconomic differences in uptake of Pap test and mammography in Italy: results from the National Health Interview Survey. <i>BMJ Open.</i> Sep 19 2018;8(9):e021653. doi:10.1136/bmjopen-2018-021653. |
| 131      | Han J, Jungsuwadee P, Abraham O, Ko D. Shared Decision-Making and Women's Adherence to Breast and Cervical Cancer Screenings. <i>Int J Environ Res Public Health.</i> Jul 17 2018;15(7). doi:10.3390/ijerph15071509.                                                       |
| 132      | Restivo V, Costantino C, Marras A, et al. Pap Testing in a High-Income Country with Suboptimal Compliance Levels: A Survey on Acceptance Factors among Sicilian Women. <i>Int J Environ Res Public Health.</i> Aug 22 2018;15(9). doi:10.3390/ijerph15091804.              |
| 133      | Luque JS, Tarasenko YN, Li H, Davila CB, Knight RN, Alcantar RE. Utilization of Cervical Cancer Screening Among Hispanic Immigrant Women in Coastal South Carolina. <i>J Racial Ethn Health Disparities.</i> Jun 2018;5(3):588-597. doi:10.1007/s40615-017-0404-7.         |
| 134      | Petkeviciene J, Ivanauskiene R, Klumbiene J. Sociodemographic and lifestyle determinants of non-attendance for cervical cancer screening in Lithuania, 2006-2014. <i>Public Health.</i> Mar 2018;156:79-86. doi:10.1016/j.puhe.2017.12.014.                                |
| 135      | Moreno PI, Yanez B, Schuetz SJ, et al. Cancer fatalism and adherence to national cancer screening guidelines: Results from the Hispanic Community Health Study/Study of Latinos (HCHS/SOL). <i>Cancer Epidemiol.</i> Jun 2019;60:39-45. doi:10.1016/j.canep.2019.03.003.   |
| 136      | Lucas-Wright A, Duran P, Bazargan M, Vargas C, Maxwell AE. Cancer-related Knowledge, Attitudes and Behaviors within the Latino Faith Community in South Los Angeles. <i>Ethn Dis.</i> Spring 2019;29(2):239-246. doi:10.18865/ed.29.2.239.                                 |
| 137      | MacLaughlin KL, Jacobson RM, Radecki Breitkopf C, et al. Trends Over Time in Pap and Pap-HPV Cotesting for Cervical Cancer Screening. <i>J Womens Health (Larchmt).</i> Feb 2019;28(2):244-249. doi:10.1089/jwh.2018.7380.                                                 |
| 138      | Kaso M, Takahashi Y, Nakayama T. Factors related to cervical cancer screening among women of childrearing age: a cross-sectional study of a nationally representative sample in Japan. <i>Int J Clin Oncol.</i> Mar 2019;24(3):313-322. doi:10.1007/s10147-018-1350-z.     |
| 139      | Perez CM, Gonzalez-Barrios D, Ramos-Cartagena JM, Ortiz AP. Association of Body Mass Index With Adherence to Cervical Cancer Screening Recommendations in Hispanic Women. <i>J Low Genit Tract Dis.</i> Jan 2020;24(1):14-20. doi:10.1097/LGT.0000000000000504.            |
| 140      | Charkhchi P, Schabath MB, Carlos RC. Breast, Cervical, and Colorectal Cancer Screening Adherence: Effect of Low Body Mass Index in Women. <i>J Womens Health (Larchmt).</i> Jul 2020;29(7):996-1006. doi:10.1089/jwh.2019.7739.                                            |

| Study ID | Reference                                                                                                                                                                                                                                                                                                  |
|----------|------------------------------------------------------------------------------------------------------------------------------------------------------------------------------------------------------------------------------------------------------------------------------------------------------------|
| 141      | Abar B, Dalawari P, Ogedegbe C, Santoro-Terray L, Adler D, Bradley K. Identifying Cancer Screening Adherence in the Emergency Department Utilizing Research Associates. <i>J Emerg Med.</i> Dec 2020;59(6):894-899. doi:10.1016/j.jemermed.2020.07.013.                                                    |
| 142      | Maxwell AE, Lucas-Wright A, Gatson J, et al. Community health advisors assessing adherence to national cancer screening guidelines among African Americans in South Los Angeles. <i>Prev Med Rep.</i> Jun 2020;18:101096. doi:10.1016/j.pmedr.2020.101096.                                                 |
| 143      | Zamorano-Leon JJ, Lopez-de-Andres A, Alvarez-Gonzalez A, et al. Reduction from 2011 to 2017 in adherence to breast cancer screening and non-improvement in the uptake of cervical cancer screening among women living in Spain. <i>Maturitas.</i> May 2020;135:27-33. doi:10.1016/j.maturitas.2020.02.007. |
| 144      | Garrido CO, Coskun RA, Lent AB, Calhoun E, Harris RB. Use of cervical cancer preventive services among US women aged 21-29: an assessment of the 2010 Affordable Care Act rollout through 2018. <i>Cancer Causes Control.</i> Sep 2020;31(9):839-850. doi:10.1007/s10552-020-01325-w.                      |
| 145      | Wilding S, Wighton S, Halligan D, West R, Conner M, O'Connor DB. What factors are most influential in increasing cervical cancer screening attendance? An online study of UK-based women. <i>Health Psychol Behav.</i> Jan 1 2020;8(1):314-328. doi:10.1080/21642850.2020.1798239.                         |
| 146      | Franck JE, Ringa V, Rigal L, et al. Patterns of gynaecological check-up and their association with body mass index within the CONSTANCES cohort. <i>J Med Screen.</i> Mar 2020;28(1):10-17. doi:10.1177/0969141320914323.                                                                                  |
| 147      | Lee HY, Choi YJ, Shin J, Yoon YJ, An S. Adherence to Cervical Cancer Screening in Korean American Immigrant Women: Identifying Malleable Variables for Intervention Development. <i>J Transcult Nurs.</i> May 2020;32(3):230-238. doi:10.1177/1043659620914693.                                            |
| 148      | Barrera-Castillo M, Fernandez-Pena R, Del Valle-Gomez MDO, Fernandez-Feito A, Lana A. Social integration and gynecologic cancer screening of immigrant women in Spain. <i>Gac Sanit.</i> Sep - Oct 2020;34(5):468-473. doi:10.1016/j.gaceta.2019.01.002.                                                   |
| 149      | Deguará M, Calleja N, England K. Cervical cancer and screening: knowledge, awareness and attitudes of women in Malta. <i>J Prev Med Hyg.</i> Dec 2020;61(4):E584-E592. doi:10.15167/2421-4248/jpmh2020.61.4.1521.                                                                                          |
| 150      | dos Santos NLF, Valadares LR, de Melo AT, et al. Receptivity and Factors Associated with Cervical Cancer Preventive Measures in a Capital City of Northern Brazil. <i>Mundo Saude.</i> Jan-Dec 2020;44(1):454-464. doi:10.15343/0104-7809.202044454464.                                                    |
| 151      | Malone C, Buist DSM, Tiro J, et al. Out of reach? Correlates of cervical cancer underscreening in women with varying levels of healthcare interactions in a United States integrated delivery system. <i>Prev Med.</i> Apr 2021;145:106410. doi:10.1016/j.ypmed.2020.106410.                               |
| 152      | Pelullo CP, Cantore F, Lisciotto A, Di Giuseppe G, Pavia M. Organized Breast and Cervical Cancer Screening: Attendance and Determinants in Southern Italy. <i>Cancers (Basel).</i> Mar 30 2021;13(7). doi:10.3390/cancers13071578.                                                                         |
| 153      | Ishii K, Tabuchi T, Iso H. Combined patterns of participation in cervical, breast, and colorectal cancer screenings and factors for non-participation in each screening among women in Japan. <i>Prev Med.</i> May 18 2021;106627. doi:10.1016/j.ypmed.2021.106627.                                        |

**Table S6** Basic characteristics of the included studies

| Study ID | Author               | Year published/<br>Year investigated | Country   | WHO/WB region | Place | SDI   | Data source <sup>a</sup> | Study design <sup>b</sup> | Definition of adherence                   | Screening method | Screening interval | Sample size <sup>c</sup> | Adherent women | Age range (year) |
|----------|----------------------|--------------------------------------|-----------|---------------|-------|-------|--------------------------|---------------------------|-------------------------------------------|------------------|--------------------|--------------------------|----------------|------------------|
| 1        | Cohen MM, et al.     | 1992/1983                            | Canada    | AMR/HIC       | Both  | 0.771 | 2                        | 1                         | Pap test every 5 years                    | Pap              | 5 years            | 22287                    | 12414          | 27-66            |
| 2        | Lantz PM, et al.     | 1997/1993                            | USA       | AMR/HIC       | Rural | 0.778 | 1                        | 1                         | Pap test in 3 years                       | Pap              | 3 years            | 1168                     | 816            | ≥40              |
| 3        | Risendal B, et al.   | 1999/1996                            | USA       | AMR/HIC       | Urban | 0.788 | 1                        | 1                         | Pap test every year                       | Pap              | 1 year             | 519                      | 257            | ≥18              |
| 4        | Fernandez ME, et al. | 1999/1996                            | USA       | AMR/HIC       | NA    | 0.788 | 1                        | 1                         | Pap test every year                       | Pap              | 1 year             | 15427                    | 5627           | ≥18              |
| 5        | Rohlfs I, et al.     | 1999/1992                            | Spain     | EUR/HIC       | NA    | 0.662 | 1                        | 1                         | Pap test every 3 or 5 years               | Pap              | 3/5 years          | 1667                     | 776            | ≥30              |
| 6        | Taylor VM, et al.    | 1999/1998                            | USA       | AMR/HIC       | NA    | 0.791 | 1                        | 1                         | Pap test every year                       | Pap              | 1 year             | 406                      | 190            | ≥18              |
| 7        | Maxwell AE, et al.   | 2000/1996                            | USA       | AMR/HIC       | NA    | 0.788 | 1                        | 1                         | Pap test every year or every 2 years      | Pap              | 1/2 years          | 447                      | 199            | 50-83            |
| 8        | Ramirez AG, et al.   | 2000/1994                            | USA       | AMR/HIC       | NA    | 0.782 | 1                        | 1                         | Pap test every 3 years                    | Pap              | 3 years            | 3928                     | 3081           | ≥18              |
| 9        | Maxwell CJ, et al.   | 2001/1997                            | Canada    | AMR/HIC       | NA    | 0.812 | 1                        | 1                         | Pap test every 3 years                    | Pap              | 3 years            | 33817                    | 24348          | ≥18              |
| 10       | Do HH, et al.        | 2001/1999                            | USA       | AMR/HIC       | Urban | 0.794 | 1                        | 1                         | Pap test every 2 years                    | Pap              | 2 years            | 647                      | 387            | ≥20              |
| 11       | Jirojwong S, et al.  | 2001/1998                            | Australia | WPR/HIC       | NA    | 0.770 | 1                        | 1                         | Biennial cervical screening every 5 years | Pap              | 5 years (twice)    | 134                      | 52             | NA               |

| Study ID | Author                      | Year published/<br>Year investigated | Country   | WHO/WB region | Place | SDI   | Data source <sup>a</sup> | Study design <sup>b</sup> | Definition of adherence                                                                  | Screening method | Screening interval                                | Sample size <sup>c</sup> | Adherent women | Age range (year) |
|----------|-----------------------------|--------------------------------------|-----------|---------------|-------|-------|--------------------------|---------------------------|------------------------------------------------------------------------------------------|------------------|---------------------------------------------------|--------------------------|----------------|------------------|
| 12       | Lee J, et al.               | 2002/1998                            | Singapore | WPR/HIC       | NA    | 0.756 | 1                        | 1                         | Pap test every 3 years                                                                   | Pap              | 3 years                                           | 726                      | 302            | 30-59            |
| 13       | Cyrus-David MS, et al.      | 2002/1996                            | USA       | AMR/HIC       | Rural | 0.788 | 1                        | 1                         | At least 3 Pap tests for high-risk women and 1 Pap test for low-risk women every 3 years | Pap              | 1 year (high-risk women)/3 years (low-risk women) | 614                      | 254            | ≥40              |
| 14       | Amonkar MM, et al.          | 2002/1997                            | USA       | AMR/HIC       | Both  | 0.789 | 1                        | 1                         | Pap test every 3 years                                                                   | Pap              | 3 years                                           | 23498                    | 20366          | ≥18              |
| 15       | Fernandez-Esquer ME, et al. | 2003/1992                            | USA       | AMR/HIC       | Urban | 0.775 | 1                        | 1                         | Biennial Pap test every 5 years                                                          | Pap              | 5 years (twice)                                   | 1804                     | 1020           | 18-91            |
| 16       | Selvin E, et al.            | 2003/1998                            | USA       | AMR/HIC       | NA    | 0.791 | 1                        | 1                         | Pap test every 3 years                                                                   | Pap              | 3 years                                           | 5509                     | 4572           | 40-64            |
| 17       | Juon HS, et al.             | 2003/2000                            | USA       | AMR/HIC       | NA    | 0.797 | 1                        | 1                         | Pap test every 2 years                                                                   | Pap              | 2 years                                           | 459                      | 177            | ≥40              |
| 18       | Miedema BB, et al.          | 2003/2002                            | Canada    | AMR/HIC       | Rural | 0.832 | 1                        | 1                         | Pap test every 3 years                                                                   | Pap              | 3 years                                           | 518                      | 471            | 50-69            |
| 19       | Hou SI, et al.              | 2003/1999                            | China     | WPR/HIC       | NA    | 0.747 | 1                        | 1                         | Pap test every 3 years                                                                   | Pap              | 3 years                                           | 125                      | 73             | NA               |
| 20       | Luengo Matos S, et al.      | 2003/2000                            | Spain     | EUR/HIC       | NA    | 0.705 | 1                        | 1                         | Pap test every 5 years                                                                   | Pap              | 5 years                                           | 2409                     | 1196           | 40-70            |

| Study ID | Author                 | Year published/<br>Year investigated | Country     | WHO/WB region | Place | SDI   | Data source <sup>a</sup> | Study design <sup>b</sup> | Definition of adherence | Screening method | Screening interval | Sample size <sup>c</sup> | Adherent women | Age range (year) |
|----------|------------------------|--------------------------------------|-------------|---------------|-------|-------|--------------------------|---------------------------|-------------------------|------------------|--------------------|--------------------------|----------------|------------------|
| 21       | Taylor VM, et al.      | 2004/2002                            | USA         | AMR/HIC       | NA    | 0.806 | 1                        | 1                         | Pap test every 3 years  | Pap              | 3 years            | 352                      | 240            | 18-64            |
| 22       | Coronado GD, et al.    | 2004/1998                            | USA         | AMR/HIC       | Rural | 0.791 | 1                        | 1                         | Pap test every 3 years  | Pap              | 3 years            | 767                      | 612            | 18-64            |
| 23       | Insinga RP, et al.     | 2004/2000                            | USA         | AMR/HIC       | NA    | 0.797 | 2                        | 1                         | Pap test every 3 years  | Pap              | 3 years            | 28692                    | 19238          | ≥15              |
| 24       | Dettenborn L, et al.   | 2004/1999                            | USA         | AMR/HIC       | Urban | 0.794 | 1                        | 1                         | Pap test every 1 year   | Pap              | 1 year             | 181                      | 119            | ≥20              |
| 25       | Borrayo EA, et al.     | 2004/1999                            | USA         | AMR/HIC       | NA    | 0.794 | 1                        | 1                         | Pap test every 1 year   | Pap              | 1 year             | 153                      | 100            | 22-84            |
| 26       | Bazargan M, et al.     | 2004/1999                            | USA         | AMR/HIC       | Urban | 0.794 | 1                        | 1                         | Pap test every 2 years  | Pap              | 2 years            | 230                      | 144            | 18-88            |
| 27       | Cho IS, et al.         | 2004/2000                            | South Korea | WPR/HIC       | Urban | 0.784 | 1                        | 1                         | Pap test every 2 years  | Pap              | 2 years            | 200                      | 109            | 40-60            |
| 28       | Hoyo C, et al.         | 2005/2001                            | USA         | AMR/HIC       | NA    | 0.802 | 1                        | 1                         | Pap test every 3 years  | Pap              | 3 years            | 144                      | 119            | 45-65            |
| 29       | De Alba I, et al.      | 2005/2001                            | USA         | AMR/HIC       | NA    | 0.802 | 1                        | 1                         | Pap test every 3 years  | Pap              | 3 years            | 25228                    | 25027          | ≥18              |
| 30       | Kwak MS, et al.        | 2005/2004                            | South Korea | WPR/HIC       | NA    | 0.811 | 1                        | 1                         | Pap test every 2 years  | Pap              | 2 years            | 1545                     | 901            | ≥30              |
| 31       | Giorgi Rossi P, et al. | 2006/2004                            | Italy       | EUR/HIC       | Rural | 0.766 | 2                        | 1                         | Pap test every 3 years  | Pap              | 3 years            | 641                      | 554            | 25-64            |
| 32       | Carruth AK, et al.     | 2006/2001                            | USA         | AMR/HIC       | Rural | 0.802 | 1                        | 1                         | Pap test every 3 years  | Pap              | 3 years            | 2324                     | 1742           | >18              |
| 33       | Liao CC, et al.        | 2006/2000                            | China       | WPR/HIC       | Both  | 0.754 | 1                        | 1                         | Pap test every 1 year   | Pap              | 1 year             | 1021                     | 240            | ≥20              |

| Study ID | Author                  | Year published/<br>Year investigated | Country     | WHO/WB region | Place | SDI   | Data source <sup>a</sup> | Study design <sup>b</sup> | Definition of adherence          | Screening method | Screening interval | Sample size <sup>c</sup> | Adherent women | Age range (year) |
|----------|-------------------------|--------------------------------------|-------------|---------------|-------|-------|--------------------------|---------------------------|----------------------------------|------------------|--------------------|--------------------------|----------------|------------------|
| 34       | Lee-Lin F, et al.       | 2007/2002                            | USA         | AMR/HIC       | Urban | 0.806 | 1                        | 1                         | Pap test every 3 years           | Pap              | 3 years            | 100                      | 68             | 40-91            |
| 35       | Chen LS, et al.         | 2007/2002                            | China       | WPR/HIC       | Both  | 0.772 | 2                        | 1                         | Pap test every 3 years           | Pap              | 3 years            | 5815781                  | 3034631        | ≥30              |
| 36       | Gao W, et al.           | 2008/2007                            | New Zealand | WPR/HIC       | NA    | 0.800 | 1                        | 1                         | Pap test every 3 years           | Pap              | 3 years            | 234                      | 131            | 20-69            |
| 37       | Tsui J, et al.          | 2008/2003                            | USA         | AMR/HIC       | NA    | 0.809 | 1                        | 1                         | Pap test every 3 years           | Pap              | 3 years            | 322                      | 198            | ≥18              |
| 38       | Puig-Tintore LM, et al. | 2008/2005                            | Spain       | EUR/HIC       | Both  | 0.725 | 1                        | 1                         | Pap test every 3 years           | Pap              | 3 years            | 5789                     | 4376           | 18-65            |
| 39       | Ginde AA, et al.        | 2008/2007                            | USA         | AMR/HIC       | Urban | 0.814 | 1                        | 1                         | Pap test every 3 years           | Pap              | 3 years            | 202                      | 135            | ≥18              |
| 40       | Tung WC, et al.         | 2008/2003                            | USA         | AMR/HIC       | NA    | 0.809 | 1                        | 1                         | Pap test every 1 year            | Pap              | 1 year             | 80                       | 37             | 20-65            |
| 41       | Nelson W, et al.        | 2009/2005                            | USA         | AMR/HIC       | NA    | 0.812 | 1                        | 1                         | Cervical screening every 3 years | Pap              | 3 years            | 2070                     | 1739           | 25-64            |
| 42       | Ma GX, et al.           | 2009/2006                            | USA         | AMR/HIC       | NA    | 0.811 | 1                        | 1                         | Pap test every 1 year            | Pap              | 1 year             | 1049                     | 404            | 18-65            |
| 43       | Dimitrakaki C, et al.   | 2009/2006                            | Greece      | EUR/HIC       | Both  | 0.765 | 1                        | 1                         | Pap test every 3 years           | Pap              | 3 years            | 424                      | 252            | 21-69            |
| 44       | Amankwah E, et al.      | 2009/2003                            | Canada      | AMR/HIC       | NA    | 0.835 | 1                        | 1                         | Pap test every 3 years           | Pap              | 3 years            | 76214                    | 65442          | 18-65            |
| 45       | Taylor VM, et al.       | 2009/2005                            | USA         | AMR/HIC       | NA    | 0.812 | 1                        | 1                         | Pap test every 3 years           | Pap              | 3 years            | 1516                     | 1228           | 20-79            |



| Study ID | Author                    | Year published/<br>Year investigated | Country | WHO/WB region | Place | SDI   | Data source <sup>a</sup> | Study design <sup>b</sup> | Definition of adherence                                                                    | Screening method | Screening interval                                 | Sample size <sup>c</sup> | Adherent women | Age range (year) |
|----------|---------------------------|--------------------------------------|---------|---------------|-------|-------|--------------------------|---------------------------|--------------------------------------------------------------------------------------------|------------------|----------------------------------------------------|--------------------------|----------------|------------------|
| 46       | Sun YG, et al.            | 2009/2004                            | China   | WPR/LMIC      | Urban | 0.561 | 1                        | 1                         | Cervical screening every 2 years                                                           | NA               | 2 years                                            | 1490                     | 790            | 25-65            |
| 47       | Martin-Lopez R, et al.    | 2010/2007                            | Spain   | EUR/HIC       | NA    | 0.730 | 1                        | 1                         | Pap test every 3 years                                                                     | Pap              | 3 years                                            | 9725                     | 6555           | 25-64            |
| 48A      | Zhou J, et al.            | 2010/2000                            | USA     | AMR/HIC       | NA    | 0.797 | 1                        | 1                         | Pap test every 1 year for women aged 18-29 years; every 3 years for women aged 30-69 years | Pap              | 1 year (18-29 years old)/3 years (30-69 years old) | 10773                    | 8565           | 18-69            |
| 48B      | Zhou J, et al.            | 2010/2005                            | USA     | AMR/HIC       | NA    | 0.812 | 1                        | 1                         | Pap test every 1 year for women aged 18-29 years; every 3 years for women aged 30-69 years | Pap              | 1 year (18-29 years old)/3 years (30-69 years old) | 10392                    | 8037           | 18-69            |
| 49       | Byrne MM, et al.          | 2010/2007                            | USA     | AMR/HIC       | NA    | 0.814 | 1                        | 1                         | Pap test every 3 years                                                                     | Pap              | 3 years                                            | 21081                    | 16371          | ≥21              |
| 50       | Lopez-de-Andres A, et al. | 2010/2005                            | Spain   | EUR/HIC       | Urban | 0.725 | 1                        | 1                         | Pap test every 3 years                                                                     | Pap              | 3 years                                            | 3200                     | 2451           | 18-69            |
| 51       | Lim JW                    | 2010/2007                            | USA     | AMR/HIC       | NA    | 0.814 | 1                        | 1                         | Pap test every 3 years                                                                     | Pap              | 3 years                                            | 6051                     | 4885           | ≥18              |
| 52       | Paskett ED, et al.        | 2010/2006                            | USA     | AMR/HIC       | NA    | 0.811 | 2                        | 1                         | Pap test in 13 months for high-risk women; Pap test in 37 months for low-risk women        | Pap              | 13 months (high-risk women)/37                     | 562                      | 380            | ≥18              |

| Study ID | Author                | Year published/<br>Year investigated | Country     | WHO/WB region | Place | SDI   | Data source <sup>a</sup> | Study design <sup>b</sup> | Definition of adherence | Screening method | Screening interval      | Sample size <sup>c</sup> | Adherent women | Age range (year) |
|----------|-----------------------|--------------------------------------|-------------|---------------|-------|-------|--------------------------|---------------------------|-------------------------|------------------|-------------------------|--------------------------|----------------|------------------|
|          |                       |                                      |             |               |       |       |                          |                           |                         |                  | months (low-risk women) |                          |                |                  |
| 53       | Lee K, et al.         | 2010/2005                            | South Korea | WPR/HIC       | Both  | 0.817 | 1                        | 1                         | Pap test every 2 years  | Pap              | 2 years                 | 3413                     | 1457           | ≥30              |
| 54       | Meng RL, et al.       | 2010/2005                            | China       | WPR/LMIC      | Both  | 0.571 | 1                        | 1                         | Pap test every 3 years  | Pap              | 3 years                 | 3457                     | 415            | 15-68            |
| 55       | Wang CF, et al.       | 2010/2007                            | China       | WPR/LMIC      | Both  | 0.591 | 1                        | 1                         | Pap test every 3 years  | Pap              | 3 years                 | 10520                    | 3407           | 15-69            |
| 56       | Lawsin C, et al.      | 2011/2006                            | USA         | AMR/HIC       | NA    | 0.811 | 1                        | 1                         | Pap test every 3 years  | Pap              | 3 years                 | 236                      | 190            | NA               |
| 57       | Cheung NW, et al.     | 2011/2004                            | Australia   | WPR/HIC       | NA    | 0.795 | 1                        | 1                         | Pap test every 2 years  | Pap              | 2 years                 | 249                      | 206            | 18-70            |
| 58       | Pons-Vigues M, et al. | 2011/2006                            | Spain       | EUR/HIC       | NA    | 0.730 | 1                        | 1                         | Pap test every 5 years  | Pap              | 5 years                 | 10093                    | 6250           | 25-65            |
| 59       | Tekkel M, et al.      | 2011/2004                            | Estonia     | EUR/HIC       | Both  | 0.759 | 1                        | 1                         | Pap test every 2 years  | Pap              | 2 years                 | 3226                     | 1205           | 25-64            |
| 60       | Nuno T, et al.        | 2011/2006                            | USA         | AMR/HIC       | Both  | 0.811 | 1                        | 2/1                       | Pap test every 3 years  | Pap              | 3 years                 | 289                      | 212            | 50-              |
| 61       | Hansen BT, et al.     | 2011/2005                            | Norway      | EUR/HIC       | NA    | 0.874 | 2                        | 1                         | Pap test every 4 years  | Pap              | 4 years                 | 12058                    | 10444          | 18-45            |

| Study ID | Author                    | Year published/<br>Year investigated | Country     | WHO/WB region | Place | SDI   | Data source <sup>a</sup> | Study design <sup>b</sup> | Definition of adherence          | Screening method | Screening interval | Sample size <sup>c</sup> | Adherent women | Age range (year) |
|----------|---------------------------|--------------------------------------|-------------|---------------|-------|-------|--------------------------|---------------------------|----------------------------------|------------------|--------------------|--------------------------|----------------|------------------|
| 62       | MacLaughlan SD, et al.    | 2011/2006                            | USA         | AMR/HIC       | NA    | 0.811 | 1                        | 1                         | Pap test every 3 years           | Pap              | 3 years            | 150786                   | 126509         | ≥18              |
| 63       | Vakfari A, et al.         | 2011/2007                            | Greece      | EUR/HIC       | Rural | 0.768 | 1                        | 1                         | Pap test every 3 years           | Pap              | 3 years            | 214                      | 92             | 20-64            |
| 64       | Acikgoz A, et al.         | 2011/2009                            | Turkey      | EUR/LMIC      | NA    | 0.671 | 1                        | 1                         | Pap test every 5 years           | Pap              | 5 years            | 227                      | 89             | 35-69            |
| 65       | Lee M, et al.             | 2011/2008                            | South Korea | WPR/HIC       | Both  | 0.833 | 1                        | 1                         | Pap test every 2 years           | Pap              | 2 years            | 6964                     | 3448           | ≥30              |
| 66       | Liang Q, et al.           | 2011/2006                            | China       | WPR/LMIC      | Urban | 0.581 | 1                        | 1                         | Cervical screening every 3 years | NA               | 3 years            | 4703                     | 1195           | 30-65            |
| 67       | Nguyen-Truong, CK, et al. | 2012/2010                            | USA         | AMR/HIC       | NA    | 0.832 | 1                        | 1                         | Pap test every 3 years           | Pap              | 3 years            | 211                      | 145            | 21-87            |
| 68       | Worthington C, et al.     | 2012/2000                            | Canada      | AMR/HIC       | Both  | 0.824 | 1                        | 1                         | Pap test every 3 years           | Pap              | 3 years            | 4949                     | 3039           | 20-70            |
| 69       | Gonzalez P, et al.        | 2012/2007                            | USA         | AMR/HIC       | NA    | 0.814 | 1                        | 1                         | Pap test every 3 years           | Pap              | 3 years            | 319                      | 274            | 40-56            |
| 70       | Damiani G, et al.         | 2012/2005                            | Italy       | EUR/HIC       | NA    | 0.768 | 1                        | 1                         | Pap test every 3 years           | Pap              | 3 years            | 35349                    | 18417          | 25-64            |

| Study ID | Author                 | Year published/<br>Year investigated | Country     | WHO/WB region | Place | SDI   | Data source <sup>a</sup> | Study design <sup>b</sup> | Definition of adherence                                                                     | Screening method | Screening interval                                  | Sample size <sup>c</sup> | Adherent women | Age range (year) |
|----------|------------------------|--------------------------------------|-------------|---------------|-------|-------|--------------------------|---------------------------|---------------------------------------------------------------------------------------------|------------------|-----------------------------------------------------|--------------------------|----------------|------------------|
| 71       | Martin-Lopez R, et al. | 2012/2009                            | Spain       | EUR/HIC       | NA    | 0.739 | 1                        | 1                         | Pap test every 3 years                                                                      | Pap              | 3 years                                             | 7634                     | 5048           | 25-64            |
| 72       | Muus KJ, et al.        | 2012/2005                            | USA         | AMR/HIC       | Both  | 0.812 | 1                        | 1                         | Pap test every 3 years                                                                      | Pap              | 3 years                                             | 1979                     | 1187           | ≥18              |
| 73       | Olesen SC, et al.      | 2012/2007                            | Australia   | WPR/HIC       | NA    | 0.799 | 1                        | 1                         | Pap test every 2 years                                                                      | Pap              | 2 years                                             | 1685                     | 1019           | 44-48/64-68      |
| 74       | Macedo A, et al.       | 2012/2010                            | UK          | EUR/HIC       | NA    | 0.820 | 1                        | 1                         | Pap test every 3 years for women aged 26-49 years; every 5 years for women aged 50-64 years | Pap              | 3 years (26-49 years old)/5 years (30-65 years old) | 890                      | 717            | 26-64            |
| 75       | Ko KD, et al.          | 2012/2005                            | South Korea | WPR/HIC       | NA    | 0.817 | 1                        | 1                         | Pap test every 2 years                                                                      | Pap              | 2 years                                             | 654                      | 111            | ≥65              |
| 76       | Azerkan F, et al.      | 2012/1999                            | Sweden      | EUR/HIC       | NA    | 0.819 | 2                        | 1                         | Pap test every 3 years for women aged 23-50 years; every 5 years for women aged 51-60 years | Pap              | 3 years (23-50 years old)/5 years (51-60 years old) | 2621802                  | 1567596        | 23-60            |
| 77       | Aminisani N, et al.    | 2012/2002                            | Australia   | WPR/HIC       | NA    | 0.787 | 2                        | 1                         | Pap tests every 2 years                                                                     | Pap              | 2 years                                             | 24506                    | 10494          | 40-64            |
| 78       | Nuno T, et al.         | 2012/2008                            | USA         | AMR/HIC       | Both  | 0.819 | 1                        | 1                         | Pap test every 3 years                                                                      | Pap              | 3 years                                             | 10487                    | 8787           | 40-              |

| Study ID | Author              | Year published/<br>Year investigated | Country   | WHO/WB region | Place | SDI   | Data source <sup>a</sup> | Study design <sup>b</sup> | Definition of adherence     | Screening method | Screening interval | Sample size <sup>c</sup> | Adherent women | Age range (year) |
|----------|---------------------|--------------------------------------|-----------|---------------|-------|-------|--------------------------|---------------------------|-----------------------------|------------------|--------------------|--------------------------|----------------|------------------|
| 79       | Shelton RC, et al.  | 2012/2007                            | USA       | AMR/HIC       | NA    | 0.814 | 1                        | 1                         | Pap test every 3 years      | Pap              | 3 years            | 1305                     | 968            | 18-              |
| 80       | Ashok M, et al.     | 2012/2008                            | USA       | AMR/HIC       | NA    | 0.819 | 1                        | 1                         | Pap test every 2 or 3 years | Pap              | 2/3 years          | 2915                     | 2387           | 18-64            |
| 81       | Leone LA, et al.    | 2012/2007                            | USA       | AMR/HIC       | Urban | 0.814 | 1                        | 2/1                       | Pap test every 2 years      | Pap              | 2 years            | 668                      | 503            | ≥50              |
| 82       | Shippee ND, et al.  | 2012/2007                            | USA       | AMR/HIC       | NA    | 0.814 | 1                        | 1                         | Pap test every 3 years      | Pap              | 3 years            | 1893                     | 1731           | 21-65            |
| 83       | Aminisani N, et al. | 2012/2003                            | Australia | WPR/HIC       | NA    | 0.791 | 2                        | 2                         | Pap test every 2 to 3 years | Pap              | 2-3 years          | 22239                    | 13713          | 20-54            |
| 84       | Raz R, et al.       | 2012/2007                            | Israel    | EUR/HIC       | NA    | 0.778 | 2                        | 1                         | Pap test every 3 years      | Pap              | 3 years            | 489663                   | 225795         | 21-59            |
| 85       | Borges MF, et al.   | 2012/2008                            | Brazil    | AMR/LMIC      | Urban | 0.577 | 1                        | 1                         | Pap test every 3 years      | Pap              | 3 years            | 772                      | 586            | 18-69            |
| 86       | Almeida CM, et al.  | 2013/2008                            | USA       | AMR/HIC       | NA    | 0.819 | 2                        | 1                         | Pap test every 3 years      | Pap              | 3 years            | 8018                     | 2686           | 30-91            |
| 87       | Morrison TB, et al. | 2013/2007                            | USA       | AMR/HIC       | NA    | 0.814 | 2                        | 1                         | Pap test every 3 years      | Pap              | 3 years            | 310                      | 158            | 18-65            |
| 88       | Oussaid N, et al.   | 2013/2008                            | France    | EUR/HIC       | Both  | 0.801 | 1                        | 1                         | Pap test every 3 years      | Pap              | 3 years            | 1186                     | 1057           | ≥25              |
| 89       | Cerigo H, et al.    | 2013/2005                            | Canada    | AMR/HIC       | NA    | 0.840 | 1                        | 1                         | Pap test every 3 years      | Pap              | 3 years            | 403                      | 307            | 21-69            |

| Study ID | Author              | Year published/<br>Year investigated | Country      | WHO/WB region | Place | SDI   | Data source <sup>a</sup> | Study design <sup>b</sup> | Definition of adherence          | Screening method | Screening interval | Sample size <sup>c</sup> | Adherent women | Age range (year) |
|----------|---------------------|--------------------------------------|--------------|---------------|-------|-------|--------------------------|---------------------------|----------------------------------|------------------|--------------------|--------------------------|----------------|------------------|
| 90       | Augusto EF, et al.  | 2013/2010                            | Brazil       | AMR/LMIC      | Urban | 0.590 | 1                        | 1                         | Pap test every 3 years           | Pap              | 3 years            | 351                      | 282            | 17-79            |
| 91       | Khadilkar A, et al. | 2013/2008                            | Canada       | AMR/HIC       | NA    | 0.845 | 1                        | 1                         | Pap test every 3 years           | Pap              | 3 years            | 16706                    | 12429          | 20-69            |
| 92A      | Lee M, et al.       | 2013/1998                            | South Korea  | WPR/HIC       | NA    | 0.767 | 1                        | 1                         | Pap test every 2 years           | Pap              | 2 years            | 2725                     | 1065           | ≥30              |
| 92B      | Lee M, et al.       | 2013/2001                            | South Korea  | WPR/HIC       | NA    | 0.791 | 1                        | 1                         | Pap test every 2 years           | Pap              | 2 years            | 1622                     | 646            | ≥30              |
| 92C      | Lee M, et al.       | 2013/2005                            | South Korea  | WPR/HIC       | NA    | 0.817 | 1                        | 1                         | Pap test every 2 years           | Pap              | 2 years            | 2596                     | 1166           | ≥30              |
| 92D      | Lee M, et al.       | 2013/2008                            | South Korea  | WPR/HIC       | NA    | 0.833 | 1                        | 1                         | Pap test every 2 years           | Pap              | 2 years            | 2944                     | 1362           | ≥30              |
| 92E      | Lee M, et al.       | 2013/2010                            | South Korea  | WPR/HIC       | NA    | 0.842 | 1                        | 1                         | Pap test every 2 years           | Pap              | 2 years            | 2737                     | 1408           | ≥30              |
| 93       | Suh M, et al.       | 2013/2012                            | South Korea  | WPR/HIC       | Both  | 0.851 | 1                        | 1                         | Pap test every 2 years           | Pap              | 2 years            | 2395                     | 1626           | ≥30              |
| 94       | Hernandez CM, et al | 2014/2011                            | USA          | AMR/HIC       | NA    | 0.835 | 1                        | 1                         | Biennial Pap tests every 5 years | Pap              | 5 years (twice)    | 95                       | 86             | 20-71            |
| 95       | Tsai RJ, et al.     | 2014/2010                            | USA          | AMR/HIC       | NA    | 0.832 | 1                        | 1                         | Pap test every 3 years           | Pap              | 3 years            | 6238                     | 5264           | 21-65            |
| 96       | Adonis L, et al.    | 2014/2009                            | South Africa | AFR/LMIC      | NA    | 0.637 | 1                        | 1                         | Pap test every 3 years           | Pap              | 3 years            | 2529                     | 296            | ≥16              |

| Study ID | Author                      | Year published/<br>Year investigated | Country  | WHO/WB region | Place | SDI   | Data source <sup>a</sup> | Study design <sup>b</sup> | Definition of adherence                                                                  | Screening method | Screening interval                                 | Sample size <sup>c</sup> | Adherent women | Age range (year) |
|----------|-----------------------------|--------------------------------------|----------|---------------|-------|-------|--------------------------|---------------------------|------------------------------------------------------------------------------------------|------------------|----------------------------------------------------|--------------------------|----------------|------------------|
| 97       | Moudatsou MM, et al.        | 2014/2007                            | Greece   | EUR/HIC       | Rural | 0.768 | 1                        | 1                         | Pap test every 3 years                                                                   | Pap              | 3 years                                            | 125                      | 34             | 35-75            |
| 98       | Kristensson JH, et al.      | 2014/2005                            | Denmark  | EUR/HIC       | NA    | 0.860 | 2                        | 1                         | Pap test every 5 years                                                                   | Pap              | 5 years                                            | 1052447                  | 868957         | 25-54            |
| 99A      | Arbyn M, et al.             | 2014/2005                            | Belgium  | EUR/HIC       | Both  | 0.805 | 2                        | 1                         | Pap test every 3 years                                                                   | Pap              | 3 years                                            | 2785516                  | 1706043        | 25-64            |
| 99B      | Arbyn M, et al.             | 2014/2003                            | Belgium  | EUR/HIC       | Both  | 0.799 | 2                        | 1                         | Pap test every 3 years                                                                   | Pap              | 3 years                                            | 2755113                  | 1671840        | 25-64            |
| 99C      | Arbyn M, et al.             | 2014/1999                            | Belgium  | EUR/HIC       | Both  | 0.784 | 2                        | 1                         | Pap test every 3 years                                                                   | Pap              | 3 years                                            | 2716933                  | 1591255        | 25-64            |
| 99D      | Arbyn M, et al.             | 2014/1997                            | Belgium  | EUR/HIC       | Both  | 0.779 | 2                        | 1                         | Pap test every 3 years                                                                   | Pap              | 3 years                                            | 2703047                  | 1511864        | 25-64            |
| 100      | Calo WA                     | 2014/2010                            | USA      | AMR/HIC       | NA    | 0.832 | 1                        | 1                         | Pap test every 3 years                                                                   | Pap              | 3 years                                            | 2124                     | 1708           | 21-65            |
| 101      | Documet P, et al.           | 2015/2010                            | USA      | AMR/HIC       | NA    | 0.832 | 1                        | 1                         | Pap test every year for women aged 21-29 years; every 3 years for women aged 30-65 years | Pap              | 1 year (21-29 years old)/3 years (30-65 years old) | 2123                     | 1753           | 21-65            |
| 102      | Guo F, et al.               | 2015/2013                            | USA      | AMR/HIC       | Both  | 0.842 | 1                        | 1                         | Pap test every 3 years                                                                   | Pap              | 3 years                                            | 11788                    | 9654           | 21-65            |
| 103      | Visanuyothin S, et al.      | 2015/2012                            | Thailand | SEAR/LMIC     | Urban | 0.649 | 1                        | 1                         | Pap test every 5 years                                                                   | Pap              | 5 years                                            | 595                      | 389            | 30-60            |
| 104      | Ricardo-Rodrigues I, et al. | 2015/2012                            | Spain    | EUR/HIC       | NA    | 0.749 | 1                        | 1                         | Pap test every 5 years                                                                   | Pap              | 3 years                                            | 7022                     | 4929           | 25-65            |

| Study ID | Author                 | Year published/<br>Year investigated | Country     | WHO/WB region | Place | SDI   | Data source <sup>a</sup> | Study design <sup>b</sup> | Definition of adherence                                                                               | Screening method           | Screening interval                                  | Sample size <sup>c</sup> | Adherent women | Age range (year) |
|----------|------------------------|--------------------------------------|-------------|---------------|-------|-------|--------------------------|---------------------------|-------------------------------------------------------------------------------------------------------|----------------------------|-----------------------------------------------------|--------------------------|----------------|------------------|
| 105      | Miranda-Diaz C, et al. | 2015/2012                            | USA         | AMR/HIC       | Urban | 0.839 | 1                        | 1                         | Pap test every year                                                                                   | Pap                        | 1 year                                              | 122                      | 90             | 21-85            |
| 106      | Gyulai A, et al.       | 2015/2008                            | Hungary     | EUR/HIC       | NA    | 0.763 | 1                        | 1                         | Cervical screening every 3 years                                                                      | Complex screenings and Pap | 3 years                                             | 3306                     | 2446           | 25-65            |
| 107      | Richard A, et al.      | 2015/2012                            | Switzerland | EUR/HIC       | NA    | 0.917 | 1                        | 1                         | Cervical screening every 3 years                                                                      | NA                         | 3 years                                             | 7319                     | 5336           | 20-69            |
| 108      | Schoofs J, et al.      | 2015/2012                            | Belgium     | EUR/HIC       | NA    | 0.829 | 1                        | 1                         | Pap test every 3 years                                                                                | Pap                        | 3 years                                             | 408                      | 269            | 25-64            |
| 109      | Oestensson E, et al.   | 2015/2013                            | Sweden      | EUR/HIC       | Urban | 0.858 | 1                        | 1                         | Cervical screening every 3 years for women aged 23-50 years; every 5 years for women aged 51-60 years | NA                         | 3 years (21-50 years old)/5 years (51-60 years old) | 1510                     | 763            | 23-60            |
| 110      | Barbadoro P, et al.    | 2015/2005                            | Italy       | EUR/HIC       | NA    | 0.768 | 1                        | 1                         | Pap test every 3 years                                                                                | Pap                        | 3 years                                             | 20920                    | 2867           | 25-64            |
| 111      | Du MX, et al.          | 2015/2010                            | China       | WPR/LMIC      | Rural | 0.621 | 1                        | 1                         | Cervical screening every 3 years                                                                      | NA                         | 3 years                                             | 1013                     | 292            | 25-55            |
| 112      | Hirth JM, et al.       | 2016/2012                            | USA         | AMR/HIC       | NA    | 0.839 | 1                        | 1                         | Pap test every 3 years                                                                                | Pap                        | 3 years                                             | 4992                     | 4098           | 21-69            |



| Study ID | Author                | Year published/<br>Year investigated | Country | WHO/WB region | Place | SDI   | Data source <sup>a</sup> | Study design <sup>b</sup> | Definition of adherence                                                                        | Screening method | Screening interval                                      | Sample size <sup>c</sup> | Adherent women | Age range (year) |
|----------|-----------------------|--------------------------------------|---------|---------------|-------|-------|--------------------------|---------------------------|------------------------------------------------------------------------------------------------|------------------|---------------------------------------------------------|--------------------------|----------------|------------------|
| 113      | Crawford A, et al.    | 2016/2014                            | USA     | AMR/HIC       | NA    | 0.845 | 1                        | 1                         | Pap test every 3 years; Pap test and HPV test every 5 years                                    | Pap              | 3 years                                                 | 66402                    | 60371          | 40-65            |
| 114A     | Shneyderman Y, et al. | 2016/2003                            | USA     | AMR/HIC       | NA    | 0.809 | 1                        | 1                         | Pap test every 3 years                                                                         | Pap              | 3 years                                                 | 3052                     | 2458           | 18-65            |
| 114B     | Shneyderman Y, et al. | 2016/2007                            | USA     | AMR/HIC       | NA    | 0.814 | 1                        | 1                         | Pap test every 3 years                                                                         | Pap              | 3 years                                                 | 3386                     | 2759           | 18-65            |
| 115      | Valdovinos C, et al.  | 2016/2010                            | USA/    | AMR/HIC       | NA    | 0.832 | 1                        | 1                         | Pap test every year                                                                            | Pap              | 1 year                                                  | 3095                     | 2222           | 18-74            |
| 116      | Urrutia MT, et al.    | 2016/2011                            | Chile   | AMR/HIC       | Urban | 0.712 | 1                        | 1                         | Pap test every 3 years                                                                         | Pap              | 3 years                                                 | 1042                     | 800            | 25-64            |
| 117      | Bianco A, et al.      | 2017/2012                            | Italy   | EUR/HIC       | NA    | 0.784 | 1                        | 1                         | Pap test every 3 years                                                                         | Pap              | 3 years                                                 | 419                      | 164            | 25-64            |
| 118      | Comparetto C, et al.  | 2017/2006                            | Italy   | EUR/HIC       | Urban | 0.780 | 2                        | 1                         | Pap test every 3 years                                                                         | Pap              | 3 years                                                 | 45680                    | 24061          | 25-64            |
| 119A     | Parekh N, et al.      | 2017/2007                            | USA     | AMR/HIC       | NA    | 0.814 | 2                        | 1                         | Pap test every year for women aged 21-30 years; every 2-3 years for women aged $\geq 30$ years | Pap              | 1 year (<30 years old)/2-3 years ( $\geq 30$ years old) | 14864                    | 5657           | 18-64            |
| 119B     | Parekh N, et al.      | 2017/2010                            | USA     | AMR/HIC       | NA    | 0.832 | 2                        | 1                         | Pap test every 2 years for women aged <30 years;                                               | Pap              | 2 years (<30 years old)/3                               | 14786                    | 1299           | 18-64            |

| Study ID | Author               | Year published/<br>Year investigated | Country     | WHO/WB region | Place | SDI   | Data source <sup>a</sup> | Study design <sup>b</sup> | Definition of adherence                                     | Screening method     | Screening interval           | Sample size <sup>c</sup> | Adherent women | Age range (year) |
|----------|----------------------|--------------------------------------|-------------|---------------|-------|-------|--------------------------|---------------------------|-------------------------------------------------------------|----------------------|------------------------------|--------------------------|----------------|------------------|
|          |                      |                                      |             |               |       |       |                          |                           | every 3 years for women aged $\geq 30$ years                |                      | years ( $\geq 30$ years old) |                          |                |                  |
| 120      | Leinonen MK, et al.  | 2017/2010                            | Norway      | EUR/HIC       | NA    | 0.885 | 2                        | 1                         | Pap test every 5 years                                      | Pap                  | 5 years                      | 1309679                  | 863042         | 25-69            |
| 121      | White A, et al.      | 2017/2015                            | USA         | AMR/HIC       | NA    | 0.849 | 1                        | 1                         | Pap test every 3 years; Pap test and HPV test every 5 years | Pap/Pap and HPV test | 3 years/5 years              | 10477                    | 8696           | 21-65            |
| 122      | Tung WC, et al.      | 2017/2015                            | USA         | AMR/HIC       | NA    | 0.849 | 1                        | 1                         | Pap test every 3 years                                      | Pap                  | 3 years                      | 121                      | 79             | 21-65            |
| 123      | Cadet TJ, et al.     | 2017/2008                            | USA         | AMR/HIC       | NA    | 0.819 | 1                        | 1                         | Pap test every 2 years                                      | Pap                  | 2 years                      | 243                      | 141            | $\geq 54$        |
| 124      | Lofters AK, et al.   | 2017/2015                            | Canada      | AMR/HIC       | NA    | 0.864 | 1                        | 1                         | Pap test every 3 years                                      | Pap                  | 3 years                      | 3997                     | 3146           | 21-69            |
| 125      | Zorogastua K, et al. | 2017/2012                            | USA         | AMR/HIC       | NA    | 0.839 | 1                        | 1                         | Pap test every 3 years                                      | Pap                  | 3 years                      | 130                      | 94             | 21-              |
| 126      | Chang H K, et al.    | 2017/2011                            | South Korea | WPR/HIC       | NA    | 0.846 | 1                        | 1                         | Pap test every 2 years                                      | Pap                  | 2 years                      | 3734                     | 1730           | 15-39            |
| 127      | Cofie LE, et al.     | 2018/2015                            | USA         | AMR/HIC       | NA    | 0.849 | 1                        | 1                         | Pap test every 3 years                                      | Pap                  | 3 years                      | 20080                    | 16867          | 21-65            |
| 128      | Luque JS, et al.     | 2018/2014                            | USA         | AMR/HIC       | NA    | 0.845 | 1                        | 1                         | Pap test every 3 years                                      | Pap                  | 3 years                      | 2822                     | 2307           | 21-65            |
| 129      | Rendle KA, et al.    | 2018/2013                            | USA         | AMR/HIC       | NA    | 0.842 | 2                        | 1                         | Cervical screening every 2.5-3.5 years                      | HPV test and Pap     | 2.5-3.5 years                | 491588                   | 278918         | 30-64            |

| <b>Study ID</b> | <b>Author</b>          | <b>Year published/<br/>Year investigated</b> | <b>Country</b> | <b>WHO/WB region</b> | <b>Place</b> | <b>SDI</b> | <b>Data source <sup>a</sup></b> | <b>Study design <sup>b</sup></b> | <b>Definition of adherence</b> | <b>Screening method</b> | <b>Screening interval</b> | <b>Sample size <sup>c</sup></b> | <b>Adherent women</b> | <b>Age range (year)</b> |
|-----------------|------------------------|----------------------------------------------|----------------|----------------------|--------------|------------|---------------------------------|----------------------------------|--------------------------------|-------------------------|---------------------------|---------------------------------|-----------------------|-------------------------|
| <b>130</b>      | Petrelli A, et al.     | 2018/2013                                    | Italy          | EUR/HIC              | NA           | 0.787      | 1                               | 1                                | Pap test every 3 years         | Pap                     | 3 years                   | 32831                           | 20388                 | 25-64                   |
| <b>131</b>      | Han J, et al.          | 2018/2017                                    | USA            | AMR/HIC              | NA           | 0.856      | 1                               | 1                                | Pap test every 3 years         | Pap                     | 3 years                   | 742                             | 632                   | 40-64                   |
| <b>132</b>      | Restivo V, et al.      | 2018/2016                                    | Italy          | EUR/HIC              | NA           | 0.794      | 1                               | 1                                | Pap test every 3 years         | Pap                     | 3 years                   | 365                             | 243                   | 25-64                   |
| <b>133</b>      | Luque JS, et al.       | 2018/2016                                    | USA            | AMR/HIC              | NA           | 0.853      | 1                               | 1                                | Pap test every 3 years         | Pap                     | 3 years                   | 196                             | 166                   | 21-64                   |
| <b>134A</b>     | Petkeviciene J, et al. | 2018/2006                                    | Lithuania      | EUR/HIC              | Both         | 0.765      | 1                               | 1                                | Pap test every 3 years         | Pap                     | 3 years                   | 820                             | 492                   | 25-64                   |
| <b>134B</b>     | Petkeviciene J, et al. | 2018/2008                                    | Lithuania      | EUR/HIC              | Both         | 0.782      | 1                               | 1                                | Pap test every 3 years         | Pap                     | 3 years                   | 807                             | 503                   | 25-64                   |
| <b>134C</b>     | Petkeviciene J, et al. | 2018/2010                                    | Lithuania      | EUR/HIC              | Both         | 0.797      | 1                               | 1                                | Pap test every 3 years         | Pap                     | 3 years                   | 1008                            | 715                   | 25-64                   |
| <b>134D</b>     | Petkeviciene J, et al. | 2018/2012                                    | Lithuania      | EUR/HIC              | Both         | 0.808      | 1                               | 1                                | Pap test every 3 years         | Pap                     | 3 years                   | 857                             | 606                   | 25-64                   |
| <b>134E</b>     | Petkeviciene J, et al. | 2018/2014                                    | Lithuania      | EUR/HIC              | Both         | 0.817      | 1                               | 1                                | Pap test every 3 years         | Pap                     | 3 years                   | 756                             | 561                   | 25-64                   |

| Study ID | Author                 | Year published/<br>Year investigated | Country | WHO/WB region | Place | SDI   | Data source <sup>a</sup> | Study design <sup>b</sup> | Definition of adherence                                                                               | Screening method                       | Screening interval                                  | Sample size <sup>c</sup> | Adherent women | Age range (year) |
|----------|------------------------|--------------------------------------|---------|---------------|-------|-------|--------------------------|---------------------------|-------------------------------------------------------------------------------------------------------|----------------------------------------|-----------------------------------------------------|--------------------------|----------------|------------------|
| 135      | Moreno PI, et al.      | 2019/2010                            | USA     | AMR/HIC       | NA    | 0.832 | 1                        | 1                         | Pap test every 2 years                                                                                | Pap                                    | 2 years                                             | 2960                     | 2190           | 18-74            |
| 136      | Lucas-Wright A, et al. | 2019/2014                            | USA     | AMR/HIC       | NA    | 0.845 | 1                        | 1                         | Pap test every 3 years                                                                                | Pap                                    | 3 years                                             | 257                      | 226            | 18-65            |
| 137      | MacLaughlin KL, et al. | 2019/2011                            | USA     | AMR/HIC       | Rural | 0.835 | 2                        | 1                         | Cervical screening every 3 years for women aged 25-49 years; every 5 years for women aged 50-64 years | Pap/Pap and HPV test                   | 3 years (Pap)/5 years (Pap and HPV test)            | 37123                    | 22933          | 21-65            |
| 138      | Kaso M, et al.         | 2019/2013                            | Japan   | WPR/HIC       | NA    | 0.855 | 1                        | 1                         | Cervical screening every 2 years                                                                      | NA                                     | 2 years                                             | 49217                    | 19545          | 20-39            |
| 139      | Perez CM, et al.       | 2020/2015                            | USA     | AMR/HIC       | Rural | 0.849 | 1                        | 1                         | Pap test every 3 years                                                                                | Pap                                    | 3 years                                             | 536                      | 421            | 21-64            |
| 140      | Charkhchi P, et al.    | 2020/2016                            | USA     | AMR/HIC       | NA    | 0.853 | 1                        | 1                         | Pap test every 3 years; Pap and HPV test every 5 years                                                | Pap/Pap and HPV test (30-65 years old) | 3 years/5 years (30-65 years old)                   | 113883                   | 92815          | 21-64            |
| 141      | Abar B, et al.         | 2020/2015                            | USA     | AMR/HIC       | Both  | 0.849 | 1                        | 1                         | Pap test every 3 years; Pap and HPV test every 5 years                                                | Pap/Pap and HPV test                   | 3 years (21-65 years old)/5 years (30-65 years old) | 10128                    | 8920           | 21-65            |

| Study ID | Author                   | Year published/<br>Year investigated | Country | WHO/WB region | Place | SDI   | Data source <sup>a</sup> | Study design <sup>b</sup> | Definition of adherence                                                                               | Screening method     | Screening interval                                  | Sample size <sup>c</sup> | Adherent women | Age range (year) |
|----------|--------------------------|--------------------------------------|---------|---------------|-------|-------|--------------------------|---------------------------|-------------------------------------------------------------------------------------------------------|----------------------|-----------------------------------------------------|--------------------------|----------------|------------------|
| 142      | Maxwell AE, et al.       | 2020/2017                            | USA     | AMR/HIC       | NA    | 0.856 | 1                        | 1                         | Pap test every 3 years; Pap and HPV test every 5 years                                                | Pap/Pap and HPV test | 3years/5years                                       | 137                      | 109            | 50-65            |
| 143      | Zamorano-Leon JJ, et al. | 2020/2017                            | Spain   | EUR/HIC       | NA    | 0.761 | 1                        | 1                         | Pap test every 3 years                                                                                | Cervical cytology    | 3 years                                             | 7855                     | 5734           | 25-65            |
| 144A     | Garrido CO, et al.       | 2020/2008                            | USA     | MR/HIC        | NA    | 0.819 | 1                        | 1                         | Pap test every 3 years                                                                                | Pap                  | 3 years                                             | 6505                     | 5873           | 21-29            |
| 144B     | Garrido CO, et al.       | 2020/2010                            | USA     | AMR/HIC       | NA    | 0.832 | 1                        | 1                         | Pap test every 3 years                                                                                | Pap                  | 3 years                                             | 5084                     | 4485           | 21-29            |
| 144C     | Garrido CO, et al.       | 2020/2012                            | USA     | AMR/HIC       | NA    | 0.839 | 1                        | 1                         | Pap test every 3 years                                                                                | Pap                  | 3 years                                             | 8403                     | 7134           | 21-29            |
| 144D     | Garrido CO, et al.       | 2020/2014                            | USA     | AMR/HIC       | NA    | 0.845 | 1                        | 1                         | Pap test every 3 years                                                                                | Pap                  | 3 years                                             | 7221                     | 5856           | 21-29            |
| 144E     | Garrido CO, et al.       | 2020/2016                            | USA     | AMR/HIC       | NA    | 0.853 | 1                        | 1                         | Pap test every 3 years                                                                                | Pap                  | 3 years                                             | 6507                     | 4988           | 21-29            |
| 144F     | Garrido CO, et al.       | 2020/2018                            | USA     | AMR/HIC       | NA    | 0.858 | 1                        | 1                         | Pap test every 3 years                                                                                | Pap                  | 3 years                                             | 2455                     | 1730           | 21-29            |
| 145      | Wilding S, et al.        | 2020/2015                            | UK      | EUR/HIC       | NA    | 0.837 | 1                        | 1                         | Cervical screening every 3 years for women aged 25-49 years; every 5 years for women aged 50–64 years | NA                   | 3 years (25-49 years old)/5 years (30-65 years old) | 145                      | 98             | 25-65            |
| 146      | Franck JE, et al.        | 2020/2014                            | France  | EUR/HIC       | NA    | 0.819 | 1                        | 1                         | Pap test every 4 years                                                                                | Pap                  | 4 years                                             | 6182                     | 4595           | 54-65            |
| 147      | Lee HY, et al.           | 2020/2015                            | USA     | AMR/HIC       | NA    | 0.849 | 1                        | 1                         | Pap test every 3 years                                                                                | Pap                  | 3 years                                             | 230                      | 105            | 21-85            |

| Study ID | Author                     | Year published/<br>Year investigated | Country | WHO/WB region | Place | SDI   | Data source <sup>a</sup> | Study design <sup>b</sup> | Definition of adherence  | Screening method | Screening interval | Sample size <sup>c</sup> | Adherent women | Age range (year) |
|----------|----------------------------|--------------------------------------|---------|---------------|-------|-------|--------------------------|---------------------------|--------------------------|------------------|--------------------|--------------------------|----------------|------------------|
| 148      | Barrera-Castillo M, et al. | 2020/2012                            | Spain   | EUR/HIC       | NA    | 0.749 | 1                        | 1                         | Pap test every 3 years   | Pap              | 3 years            | 8944                     | 6297           | 18-75            |
| 149      | Deguara M, et al.          | 2020/2017                            | Malta   | EUR/HIC       | NA    | 0.793 | 1                        | 1                         | Pap test every 3 years   | Pap              | 3 years            | 407                      | 281            | 25-64            |
| 150      | dos Santos NLF, et al.     | 2020/2018                            | Brazil  | AMR/LMIC      | Urban | 0.636 | 1                        | 1                         | Pap test every 3 years   | Pap              | 3 years            | 502                      | 336            | 18-60            |
| 151      | Malone C, et al.           | 2021/2015                            | USA     | AMR/HIC       | NA    | 0.849 | 2                        | 1                         | Pap test every 3.4 years | Pap              | 3.4 years          | 48711                    | 45359          | 30-64            |
| 152      | Pelullo CP, et al.         | 2021/2019                            | Italy   | EUR/HIC       | Urban | 0.801 | 1                        | 1                         | Pap test every 3 years   | Pap              | 3 years            | 706                      | 394            | 28-67            |
| 153      | Ishii K, et al.            | 2021/2016                            | Japan   | WPR/HIC       | NA    | 0.862 | 1                        | 1                         | Pap test every 2 years   | Pap              | 2 years            | 115254                   | 51823          | 40-69            |

Abbreviations: AFR, African Region; AMR, Region of the Americas; EUR, European Region; HIC, High-income country; HPV, human papillomavirus; LMIC, Low-income and middle-income country; NA, not available; Pap, Papanicolaou smear; SDI, Socio-Demographic Index; SEAR, South-East Asia Region; WB, World Bank; WHO, World Health Organization; WPR, Western Pacific Region.

<sup>a</sup> 1: self-reporting, 2: objective-recording. <sup>b</sup> 1: retrospective, 2: prospective. <sup>c</sup> The number of women who were recommended for cervical cancer screening in each study.

**Table S7** Quality scores for assessing the risk of bias for the included studies

| Study ID | Study                              | Quality score     |             |               |                    |                    |              |
|----------|------------------------------------|-------------------|-------------|---------------|--------------------|--------------------|--------------|
|          |                                    | Sample population | Sample size | Participation | Outcome assessment | Analytical methods | Total scores |
| 1        | Cohen MM, et al. (1992)            | 2                 | 1           | 1             | 2                  | 2                  | 8            |
| 2        | Lantz PM, et al. (1997)            | 2                 | 1           | 1             | 1                  | 1                  | 6            |
| 3        | Risendal B, et al. (1999)          | 1                 | 1           | 2             | 1                  | 2                  | 7            |
| 4        | Fernandez ME, et al. (1999)        | 2                 | 1           | 0             | 1                  | 1                  | 5            |
| 5        | Rohlf's I, et al. (1999)           | 2                 | 2           | 1             | 1                  | 2                  | 8            |
| 6        | Taylor VM, et al. (1999)           | 1                 | 1           | 1             | 1                  | 2                  | 6            |
| 7        | Maxwell AE, et al. (2000)          | 1                 | 1           | 0             | 1                  | 2                  | 5            |
| 8        | Ramirez AG, et al. (2000)          | 2                 | 1           | 1             | 1                  | 2                  | 7            |
| 9        | Maxwell CJ, et al. (2001)          | 2                 | 1           | 2             | 1                  | 2                  | 8            |
| 10       | Do HH, et al. (2001)               | 1                 | 1           | 0             | 1                  | 2                  | 5            |
| 11       | Jirojwong S, et al. (2001)         | 1                 | 1           | 2             | 1                  | 1                  | 6            |
| 12       | Lee J, et al. (2002)               | 1                 | 1           | 0             | 1                  | 2                  | 5            |
| 13       | Cyrus-David MS, et al. (2002)      | 2                 | 1           | 0             | 1                  | 2                  | 6            |
| 14       | Amonkar MM, et al. (2002)          | 2                 | 1           | 0             | 1                  | 2                  | 6            |
| 15       | Fernandez-Esquer ME, et al. (2003) | 2                 | 1           | 2             | 1                  | 1                  | 7            |
| 16       | Selvin E, et al. (2003)            | 2                 | 1           | 1             | 1                  | 2                  | 7            |
| 17       | Juon HS, et al. (2003)             | 1                 | 1           | 2             | 1                  | 2                  | 7            |
| 18       | Miedema BB, et al. (2003)          | 1                 | 2           | 0             | 1                  | 1                  | 5            |
| 19       | Luengo Matos S, et al. (2003)      | 2                 | 2           | 1             | 1                  | 2                  | 8            |
| 20       | Hou SI, et al. (2003)              | 1                 | 1           | 1             | 1                  | 1                  | 5            |
| 21       | Taylor VM, et al. (2004)           | 1                 | 1           | 2             | 1                  | 2                  | 7            |
| 22       | Coronado GD, et al. (2004)         | 2                 | 1           | 1             | 1                  | 1                  | 6            |
| 23       | Insinga RP, et al. (2004)          | 2                 | 1           | 0             | 2                  | 1                  | 6            |
| 24       | Dettenborn L, et al. (2004)        | 2                 | 1           | 0             | 1                  | 1                  | 5            |
| 25       | Borrayo EA, et al. (2004)          | 1                 | 1           | 1             | 1                  | 1                  | 5            |
| 26       | Bazargan M, et al. (2004)          | 2                 | 1           | 1             | 1                  | 1                  | 6            |
| 27       | Cho IS, et al. (2004)              | 1                 | 1           | 0             | 1                  | 2                  | 5            |
| 28       | Hoyo C, et al. (2005)              | 1                 | 1           | 1             | 1                  | 1                  | 5            |
| 29       | De Alba I, et al. (2005)           | 2                 | 1           | 0             | 1                  | 2                  | 6            |
| 30       | Kwak MS, et al. (2005)             | 2                 | 1           | 0             | 1                  | 2                  | 6            |
| 31       | Giorgi Rossi P, et al. (2006)      | 2                 | 2           | 0             | 1                  | 1                  | 6            |

| Study ID | Study                            | Quality score     |             |               |                    |                    |              |
|----------|----------------------------------|-------------------|-------------|---------------|--------------------|--------------------|--------------|
|          |                                  | Sample population | Sample size | Participation | Outcome assessment | Analytical methods | Total scores |
| 32       | Carruth AK, et al. (2006)        | 2                 | 1           | 2             | 1                  | 2                  | 8            |
| 33       | Liao CC, et al. (2006)           | 2                 | 1           | 2             | 1                  | 1                  | 7            |
| 34       | Lee-Lin F, et al. (2007)         | 1                 | 2           | 2             | 1                  | 1                  | 7            |
| 35       | Chen LS, et al. (2007)           | 2                 | 1           | 0             | 2                  | 2                  | 7            |
| 36       | Gao W, et al. (2008)             | 1                 | 1           | 2             | 1                  | 1                  | 6            |
| 37       | Tsui J, et al. (2008)            | 1                 | 1           | 2             | 1                  | 2                  | 7            |
| 38       | Puig-Tintore LM, et al. (2008)   | 2                 | 1           | 0             | 1                  | 2                  | 6            |
| 39       | Ginde AA, et al. (2008)          | 2                 | 1           | 1             | 1                  | 1                  | 6            |
| 40       | Tung WC, et al. (2008)           | 1                 | 1           | 0             | 1                  | 1                  | 4            |
| 41       | Nelson W, et al. (2009)          | 2                 | 1           | 0             | 1                  | 2                  | 6            |
| 42       | Ma GX, et al. (2009)             | 2                 | 2           | 0             | 1                  | 1                  | 6            |
| 43       | Dimitrakaki C, et al. (2009)     | 2                 | 1           | 1             | 1                  | 2                  | 7            |
| 44       | Amankwah E, et al. (2009)        | 2                 | 1           | 1             | 1                  | 1                  | 6            |
| 45       | Taylor VM, et al. (2009)         | 1                 | 1           | 1             | 1                  | 2                  | 6            |
| 46       | Sun YG, et al. (2009)            | 2                 | 1           | 2             | 1                  | 1                  | 7            |
| 47       | Martin-Lopez R, et al. (2010)    | 2                 | 1           | 0             | 1                  | 2                  | 6            |
| 48       | Zhou J, et al. (2010)            | 2                 | 1           | 1             | 1                  | 1                  | 6            |
| 49       | Byrne MM, et al. (2010)          | 2                 | 1           | 0             | 1                  | 2                  | 6            |
| 50       | Lopez-de-Andres A, et al. (2010) | 2                 | 2           | 0             | 1                  | 2                  | 7            |
| 51       | Lim JW. (2010)                   | 2                 | 1           | 0             | 1                  | 2                  | 6            |
| 52       | Paskett ED, et al. (2010)        | 2                 | 1           | 1             | 1                  | 2                  | 7            |
| 53       | Lee K, et al. (2010)             | 2                 | 1           | 0             | 1                  | 1                  | 5            |
| 54       | Meng RL, et al. (2010)           | 2                 | 1           | 0             | 1                  | 2                  | 6            |
| 55       | Wang CF, et al. (2010)           | 2                 | 1           | 0             | 1                  | 2                  | 6            |
| 56       | Lawsin C, et al. (2011)          | 1                 | 1           | 0             | 1                  | 1                  | 4            |
| 57       | Cheung NW, et al. (2011)         | 1                 | 1           | 0             | 1                  | 1                  | 4            |
| 58       | Pons-Vigues M, et al. (2011)     | 2                 | 1           | 0             | 1                  | 1                  | 5            |
| 59       | Tekkel M, et al. (2011)          | 2                 | 1           | 0             | 1                  | 2                  | 6            |
| 60       | Nuno T, et al. (2011)            | 2                 | 1           | 1             | 1                  | 2                  | 7            |
| 61       | Hansen BT, et al. (2011)         | 2                 | 1           | 0             | 1                  | 2                  | 6            |
| 62       | MacLaughlan SD, et al. (2011)    | 2                 | 1           | 0             | 1                  | 2                  | 6            |
| 63       | Vakfari A, et al. (2011)         | 1                 | 1           | 0             | 1                  | 1                  | 4            |
| 64       | Acikgoz A, et al. (2011)         | 1                 | 2           | 2             | 1                  | 1                  | 7            |



| Study ID | Study                           | Quality score     |             |               |                    |                    |              |
|----------|---------------------------------|-------------------|-------------|---------------|--------------------|--------------------|--------------|
|          |                                 | Sample population | Sample size | Participation | Outcome assessment | Analytical methods | Total scores |
| 65       | Lee M, et al. (2011)            | 2                 | 2           | 1             | 1                  | 2                  | 8            |
| 66       | Liang Q, et al. (2011)          | 2                 | 1           | 2             | 1                  | 2                  | 8            |
| 67       | Nguyen-Truong CK, et al. (2012) | 1                 | 1           | 2             | 1                  | 2                  | 7            |
| 68       | Worthington C, et al. (2012)    | 2                 | 1           | 2             | 1                  | 1                  | 7            |
| 69       | Gonzalez P, et al. (2012)       | 1                 | 1           | 0             | 1                  | 1                  | 4            |
| 70       | Damiani G, et al. (2012)        | 2                 | 1           | 0             | 1                  | 2                  | 6            |
| 71       | Martin-Lopez R, et al. (2012)   | 2                 | 1           | 0             | 1                  | 2                  | 6            |
| 72       | Muus KJ, et al. (2012)          | 2                 | 1           | 1             | 1                  | 1                  | 6            |
| 73       | Olesen SC, et al. (2012)        | 2                 | 1           | 0             | 2                  | 2                  | 7            |
| 74       | Macedo A, et al. (2012)         | 2                 | 1           | 0             | 1                  | 2                  | 6            |
| 75       | Ko KD, et al. (2012)            | 2                 | 1           | 0             | 1                  | 2                  | 6            |
| 76       | Azerkan F, et al. (2012)        | 2                 | 2           | 2             | 2                  | 2                  | 10           |
| 77       | Aminisani N, et al. (2012)      | 2                 | 1           | 2             | 2                  | 2                  | 9            |
| 78       | Nuno T, et al. (2012)           | 2                 | 1           | 0             | 1                  | 2                  | 6            |
| 79       | Shelton RC, et al. (2012)       | 1                 | 1           | 0             | 1                  | 2                  | 5            |
| 80       | Ashok M, et al. (2012)          | 2                 | 1           | 0             | 1                  | 2                  | 6            |
| 81       | Leone LA, et al. (2012)         | 1                 | 1           | 0             | 1                  | 2                  | 5            |
| 82       | Shippee ND, et al. (2012)       | 1                 | 1           | 0             | 2                  | 2                  | 6            |
| 83       | Aminisani N, et al. (2012)      | 2                 | 1           | 1             | 2                  | 2                  | 8            |
| 84       | Raz R, et al. (2012)            | 2                 | 1           | 1             | 2                  | 2                  | 8            |
| 85       | Borges MF, et al. (2012)        | 2                 | 2           | 2             | 1                  | 2                  | 9            |
| 86       | Almeida CM, et al. (2013)       | 2                 | 1           | 1             | 2                  | 2                  | 8            |
| 87       | Morrison TB, et al. (2013)      | 2                 | 1           | 0             | 2                  | 1                  | 6            |
| 88       | Oussaid N, et al. (2013)        | 2                 | 1           | 1             | 1                  | 2                  | 7            |
| 89       | Cerigo H, et al. (2013)         | 2                 | 1           | 2             | 1                  | 2                  | 8            |
| 90       | Augusto EF, et al. (2013)       | 2                 | 2           | 2             | 1                  | 2                  | 9            |
| 91       | Khadilkar A, et al. (2013)      | 2                 | 1           | 1             | 1                  | 2                  | 7            |
| 92       | Lee M, et al. (2013)            | 2                 | 1           | 0             | 1                  | 2                  | 6            |
| 93       | Suh M, et al. (2013)            | 2                 | 1           | 0             | 1                  | 2                  | 6            |
| 94       | Hernández CM, et al. (2014)     | 0                 | 1           | 2             | 1                  | 2                  | 6            |
| 95       | Tsai RJ, et al. (2014)          | 2                 | 1           | 0             | 1                  | 2                  | 6            |
| 96       | Adonis L, et al. (2014)         | 2                 | 1           | 0             | 1                  | 2                  | 6            |
| 97       | Moudatsou MM, et al. (2014)     | 2                 | 2           | 2             | 1                  | 2                  | 9            |

| Study ID | Study                              | Quality score     |             |               |                    |                    |              |
|----------|------------------------------------|-------------------|-------------|---------------|--------------------|--------------------|--------------|
|          |                                    | Sample population | Sample size | Participation | Outcome assessment | Analytical methods | Total scores |
| 98       | Kristensson JH, et al. (2014)      | 2                 | 2           | 2             | 2                  | 2                  | 10           |
| 99       | Arbyn M, et al. (2014)             | 2                 | 1           | 0             | 2                  | 1                  | 6            |
| 100      | Calo WA (2014)                     | 2                 | 1           | 0             | 1                  | 2                  | 6            |
| 101      | Documet P, et al. (2015)           | 2                 | 1           | 0             | 1                  | 2                  | 6            |
| 102      | Guo F, et al. (2015)               | 2                 | 1           | 1             | 1                  | 1                  | 6            |
| 103      | Visanuyothin S, et al. (2015)      | 2                 | 2           | 2             | 1                  | 2                  | 9            |
| 104      | Ricardo-Rodrigues I, et al. (2015) | 2                 | 1           | 0             | 1                  | 2                  | 6            |
| 105      | Miranda-Diaz C, et al. (2015)      | 2                 | 1           | 0             | 1                  | 2                  | 6            |
| 106      | Gyulai A, et al. (2015)            | 1                 | 1           | 2             | 1                  | 1                  | 6            |
| 107      | Richard A, et al. (2015)           | 1                 | 1           | 0             | 1                  | 2                  | 5            |
| 108      | Schoofs J, et al. (2015)           | 2                 | 1           | 0             | 1                  | 2                  | 6            |
| 109      | Oestensson E, et al. (2015)        | 1                 | 1           | 0             | 1                  | 2                  | 5            |
| 110      | Barbadoro P, et al. (2015)         | 1                 | 2           | 2             | 1                  | 2                  | 8            |
| 111      | Du MX, et al. (2015)               | 1                 | 1           | 2             | 1                  | 2                  | 7            |
| 112      | Hirth JM, et al. (2016)            | 2                 | 1           | 0             | 1                  | 2                  | 6            |
| 113      | Crawford A, et al. (2016)          | 2                 | 1           | 0             | 1                  | 2                  | 6            |
| 114      | Shneyderman Y, et al. (2016)       | 2                 | 1           | 0             | 1                  | 2                  | 6            |
| 115      | Valdovinos C, et al. (2016)        | 2                 | 1           | 0             | 1                  | 2                  | 6            |
| 116      | Urrutia MT, et al. (2016)          | 1                 | 2           | 0             | 1                  | 1                  | 5            |
| 117      | Bianco A, et al. (2017)            | 1                 | 0           | 2             | 1                  | 2                  | 6            |
| 118      | Comparetto C, et al. (2017)        | 2                 | 1           | 0             | 2                  | 1                  | 6            |
| 119      | Parekh N, et al. (2017)            | 2                 | 1           | 0             | 2                  | 1                  | 6            |
| 120      | Leinonen MK, et al. (2017)         | 2                 | 1           | 2             | 2                  | 2                  | 9            |
| 121      | White A, et al. (2017)             | 2                 | 1           | 0             | 1                  | 1                  | 5            |
| 122      | Tung WC, et al. (2017)             | 1                 | 1           | 0             | 1                  | 1                  | 4            |
| 123      | Cadet TJ, et al. (2017)            | 2                 | 1           | 0             | 1                  | 2                  | 6            |
| 124      | Lofters AK, et al. (2017)          | 2                 | 1           | 0             | 1                  | 1                  | 5            |
| 125      | Zorogastua K, et al. (2017)        | 1                 | 0           | 0             | 1                  | 1                  | 3            |
| 126      | Chang HK, et al. (2017)            | 2                 | 1           | 1             | 1                  | 2                  | 7            |
| 127      | Cofie LE, et al. (2018)            | 2                 | 1           | 0             | 1                  | 2                  | 6            |
| 128      | Luque JS, et al. (2018)            | 2                 | 1           | 0             | 1                  | 2                  | 6            |
| 129      | Rendle KA, et al. (2018)           | 2                 | 1           | 0             | 2                  | 2                  | 7            |
| 130      | Petrelli A, et al. (2018)          | 2                 | 1           | 0             | 1                  | 2                  | 6            |

| Study ID | Study                             | Quality score     |             |               |                    |                    |              |
|----------|-----------------------------------|-------------------|-------------|---------------|--------------------|--------------------|--------------|
|          |                                   | Sample population | Sample size | Participation | Outcome assessment | Analytical methods | Total scores |
| 131      | Han J, et al. (2018)              | 2                 | 1           | 0             | 1                  | 2                  | 6            |
| 132      | Restivo V, et al. (2018)          | 2                 | 1           | 1             | 1                  | 2                  | 7            |
| 133      | Luque JS, et al. (2018)           | 1                 | 1           | 0             | 1                  | 1                  | 4            |
| 134      | Petkeviciene J, et al. (2018)     | 2                 | 1           | 0             | 1                  | 2                  | 6            |
| 135      | Moreno PI, et al. (2019)          | 2                 | 1           | 0             | 1                  | 2                  | 6            |
| 136      | Lucas-Wright A, et al. (2019)     | 1                 | 1           | 0             | 1                  | 1                  | 4            |
| 137      | MacLaughlin KL, et al. (2019)     | 2                 | 1           | 2             | 2                  | 2                  | 9            |
| 138      | Kaso M, et al. (2019)             | 2                 | 1           | 0             | 1                  | 2                  | 6            |
| 139      | Perez CM, et al. (2020)           | 2                 | 1           | 2             | 1                  | 2                  | 8            |
| 140      | Charkhchi P, et al. (2020)        | 2                 | 1           | 0             | 1                  | 2                  | 6            |
| 141      | Abar B, et al. (2020)             | 0                 | 1           | 2             | 1                  | 1                  | 5            |
| 142      | Maxwell AE, et al. (2020)         | 1                 | 1           | 0             | 1                  | 1                  | 4            |
| 143      | Zamorano-Leon JJ, et al. (2020)   | 2                 | 1           | 0             | 1                  | 2                  | 6            |
| 144      | Garrido CO, et al. (2020)         | 2                 | 1           | 0             | 1                  | 2                  | 6            |
| 145      | Wilding S, et al. (2020)          | 1                 | 1           | 0             | 1                  | 2                  | 5            |
| 146      | Franck JE, et al. (2020)          | 2                 | 1           | 0             | 1                  | 2                  | 6            |
| 147      | Lee HY, et al. (2020)             | 2                 | 2           | 0             | 1                  | 2                  | 7            |
| 148      | Barrera-Castillo M, et al. (2020) | 2                 | 1           | 0             | 1                  | 2                  | 6            |
| 149      | Deguara M, et al. (2020)          | 2                 | 2           | 2             | 1                  | 2                  | 9            |
| 150      | dos Santos NLF, et al. (2020)     | 2                 | 1           | 0             | 1                  | 1                  | 5            |
| 151      | Malone C, et al. (2021)           | 2                 | 1           | 0             | 1                  | 2                  | 6            |
| 152      | Pelullo CP, et al. (2021)         | 2                 | 1           | 0             | 1                  | 2                  | 6            |
| 153      | Ishii K, et al. (2021)            | 2                 | 1           | 1             | 1                  | 1                  | 6            |

**Table S9** Meta-analyses of associated factors for adherence to cervical cancer screening

| Associated factor | Study ID | Study | Pooled adherence rate |
|-------------------|----------|-------|-----------------------|
|-------------------|----------|-------|-----------------------|

**Associated factor 1: Marital status**

**Married vs Not Married (n=15)**

|     |                                       |
|-----|---------------------------------------|
| 1   | Cohen MM, et al.                      |
| 7   | Maxwell AE, et al.                    |
| 16  | Selvin E, et al. (Non-Hispanic White) |
| 16  | Selvin E, et al. (Non-Hispanic Black) |
| 16  | Selvin E, et al. (Hispanic)           |
| 17  | Juon HS, et al.                       |
| 32  | Carruth AK, et al.                    |
| 43  | Dimitrakaki C, et al.                 |
| 60  | Nuno T, et al.                        |
| 82  | Shippee ND, et al.                    |
| 98  | Kristensson JH, et al.                |
| 120 | Leinonen MK, et al. (<45 years old)   |
| 120 | Leinonen MK, et al. (≥45 years old)   |
| 117 | Bianco A, et al.                      |
| 132 | Restivo V, et al.                     |

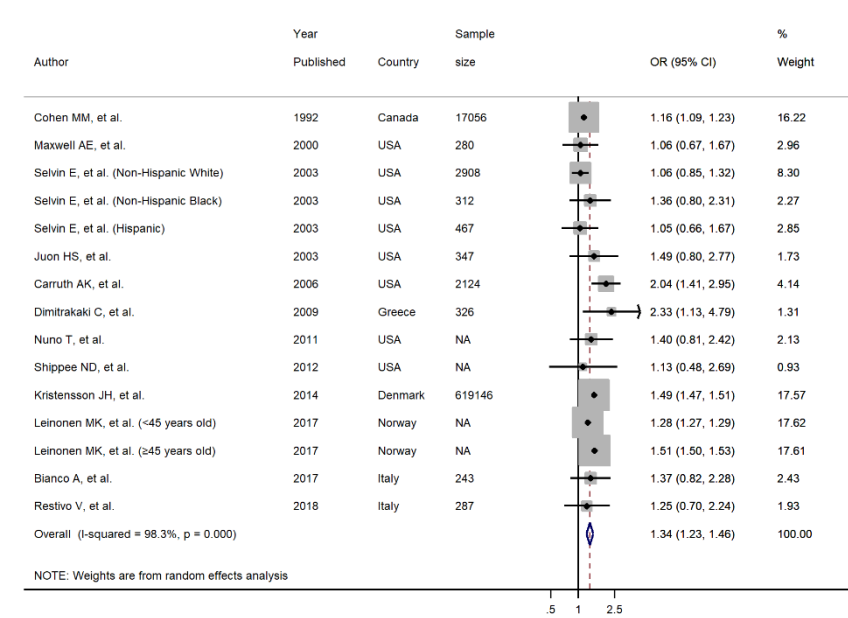

**Married vs Single (n=12)**

|    |                        |
|----|------------------------|
| 5  | Rohlfs I, et al.       |
| 12 | Lee J, et al.          |
| 13 | Cyrus-David MS, et al. |
| 47 | Martin-Lopez R, et al. |

| Associated factor | Study ID | Study | Pooled adherence rate |
|-------------------|----------|-------|-----------------------|
|-------------------|----------|-------|-----------------------|

|  |     |                                          |
|--|-----|------------------------------------------|
|  | 70  | Damiani G, et al.                        |
|  | 71  | Martin-Lopez R, et al.                   |
|  | 74  | Macedo A, et al.                         |
|  | 104 | Ricardo-Rodrigues I, et al.              |
|  | 134 | Petkeviciene J, et al. (25-44 years old) |
|  | 134 | Petkeviciene J, et al. (45-60 years old) |
|  | 138 | Kaso M, et al.                           |
|  | 143 | Zamorano-Leon JJ, et al.                 |

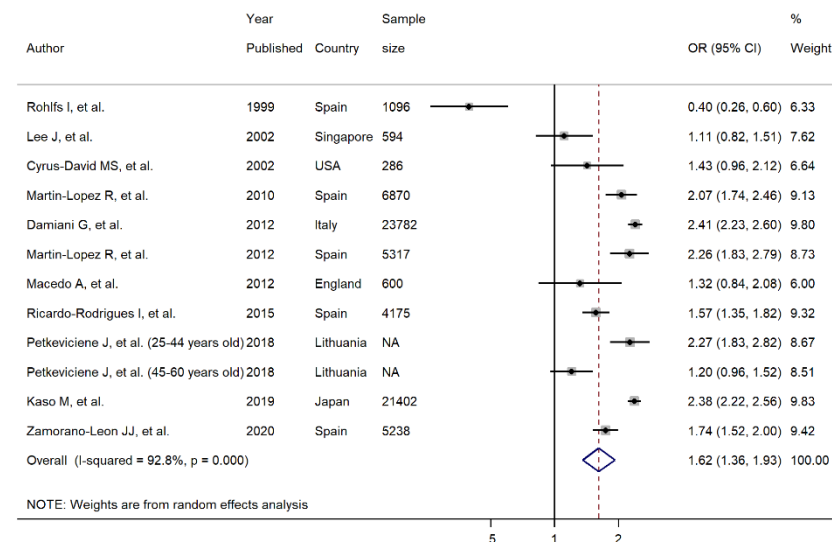

**Partnered vs No partnered (n=9)**

|  |     |                                                |
|--|-----|------------------------------------------------|
|  | 37  | Tsui J, et al.                                 |
|  | 75  | Ko KD, et al.                                  |
|  | 79  | Shelton RC, et al. (Mexico)                    |
|  | 79  | Shelton RC, et al. (Puerto Rico)               |
|  | 79  | Shelton RC, et al. (Central and South America) |
|  | 103 | Visanuyothin S, et al.                         |
|  | 106 | Gyulai A, et al.                               |
|  | 128 | Luque JS, et al.                               |
|  | 140 | Charkhchi P, et al.                            |

| Associated factor | Study ID | Study | Pooled adherence rate |
|-------------------|----------|-------|-----------------------|
|-------------------|----------|-------|-----------------------|

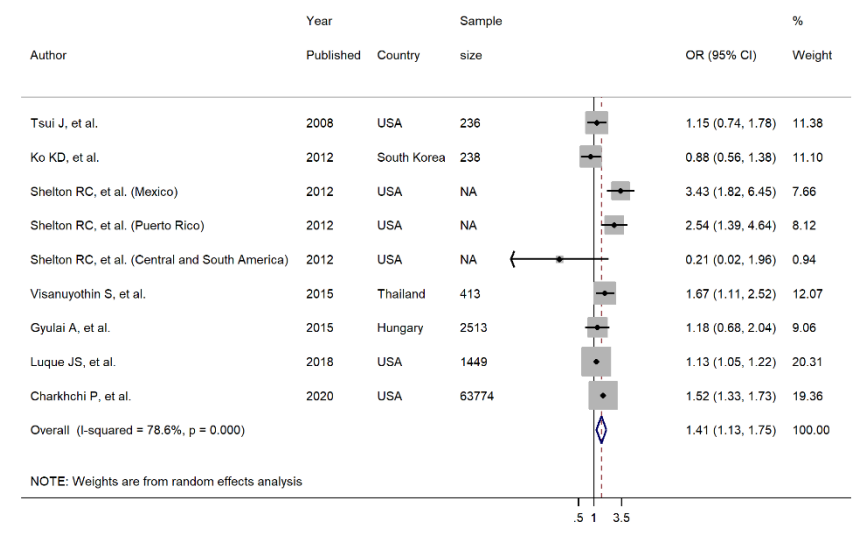

**Currently married vs Never married (n=3)**

|    |                   |
|----|-------------------|
| 10 | Do HH, et al.     |
| 21 | Taylor VM, et al. |
| 45 | Taylor VM, et al. |

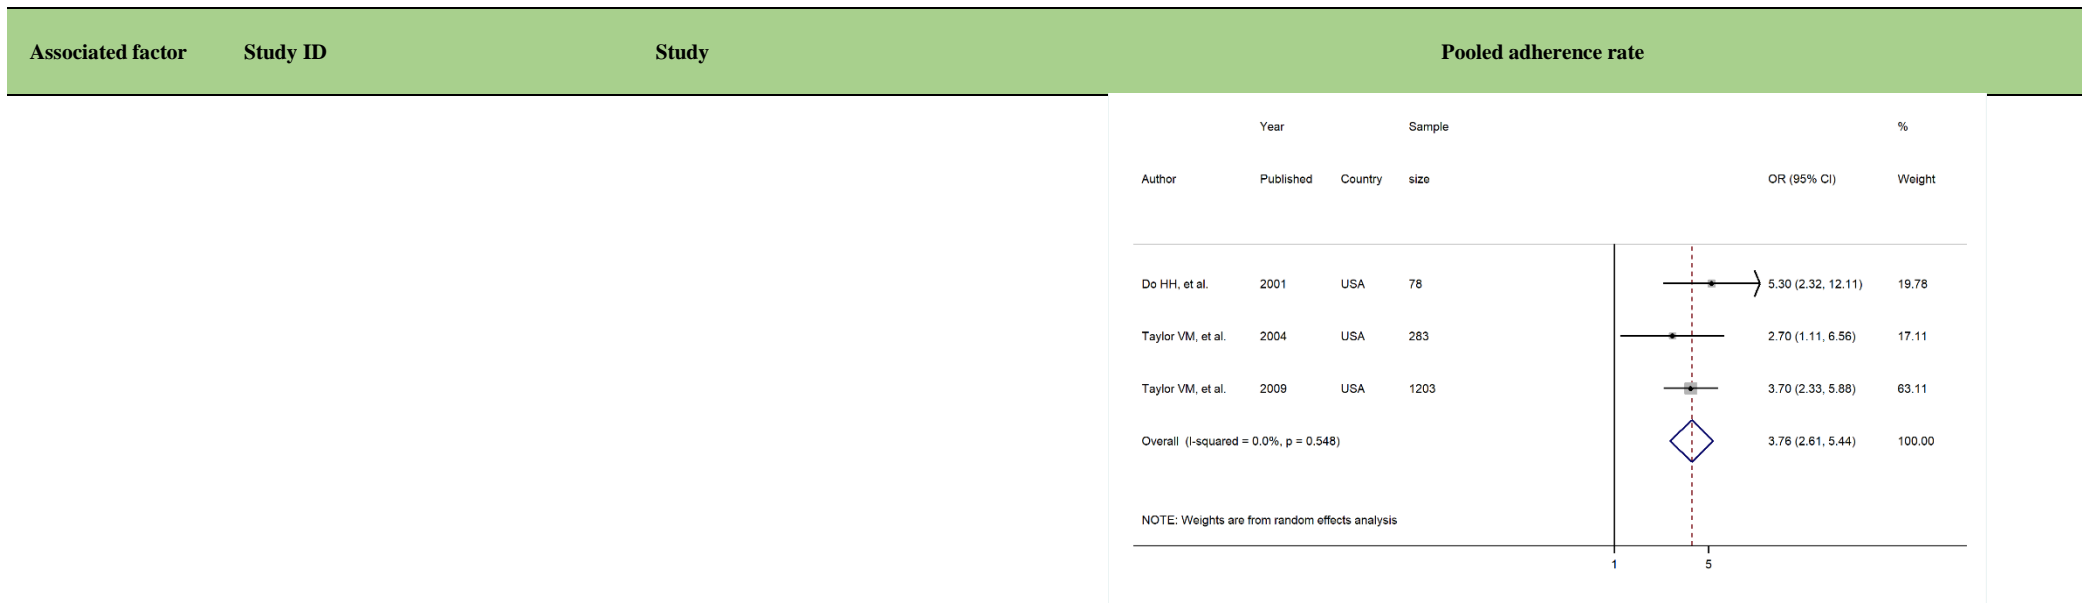

**Previously married vs Never married (n=3)**

|    |                   |
|----|-------------------|
| 10 | Do HH, et al.     |
| 45 | Taylor VM, et al. |
| 21 | Taylor VM, et al. |

| Associated factor | Study ID | Study | Pooled adherence rate |  |  |
|-------------------|----------|-------|-----------------------|--|--|
|-------------------|----------|-------|-----------------------|--|--|

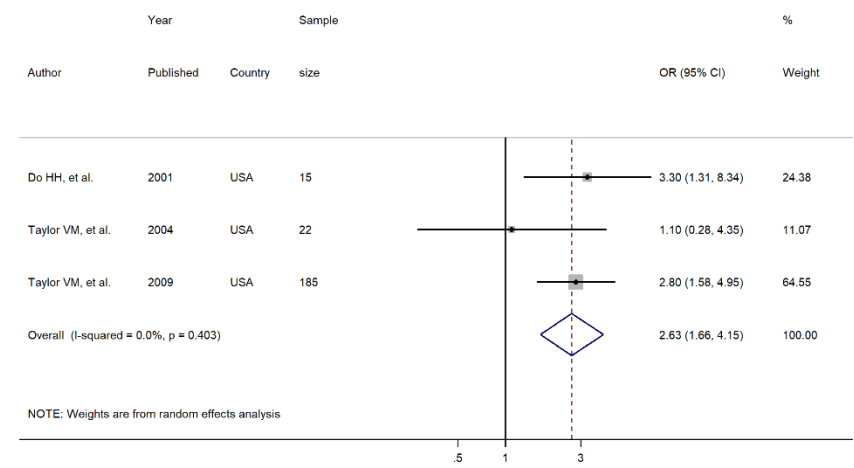

**Married vs Divorced/Widowed/Separated (n=5)**

|     |                                     |
|-----|-------------------------------------|
| 14  | Amonkar MM, et al.                  |
| 66  | Liang Q, et al.                     |
| 74  | Macedo A, et al.                    |
| 120 | Leinonen MK, et al. (<45 years old) |
| 120 | Leinonen MK, et al. (≥45 years old) |

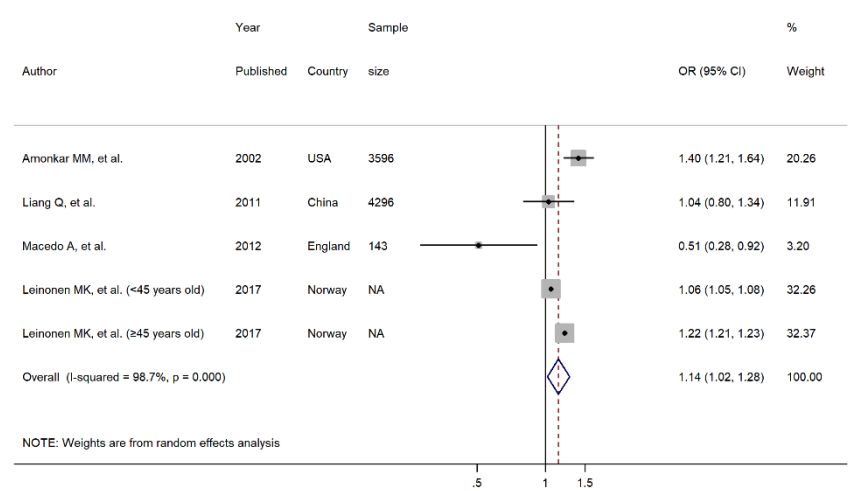



**Associated factor      Study ID      Study      Pooled adherence rate**

**Divorced/Widowed/Separated vs Single (n=5)**

|     |                        |
|-----|------------------------|
| 47  | Martin-Lopez R, et al. |
| 70  | Damiani G, et al.      |
| 71  | Martin-Lopez R, et al. |
| 110 | Barbadoro P, et al.    |
| 138 | Kaso M, et al.         |

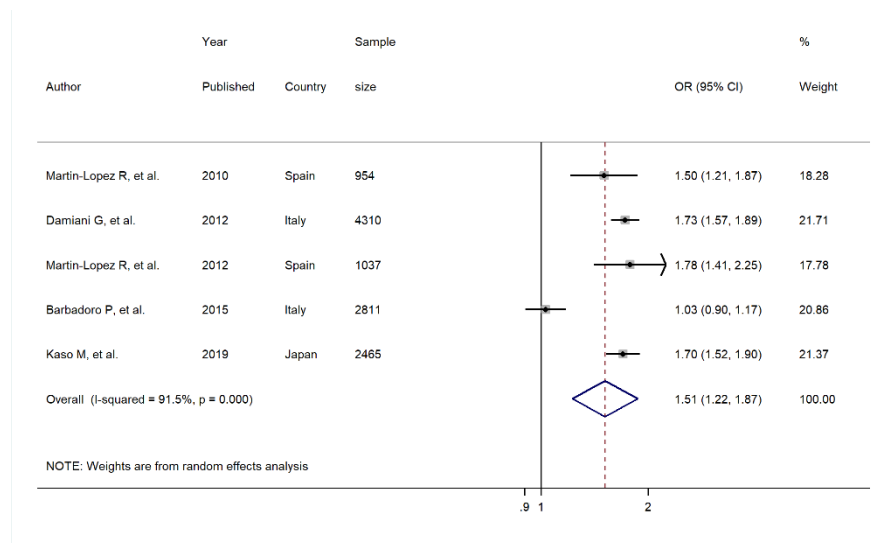

**Associated factor 2: Education level**

**High school vs less than high school (n=53)**

|    |                                       |
|----|---------------------------------------|
| 5  | Rohlf I, et al.                       |
| 7  | Maxwell AE, et al.                    |
| 8  | Ramirez AG, et al. (<40 years old)    |
| 8  | Ramirez AG, et al. (≥40 years old)    |
| 9  | Maxwell CJ, et al.                    |
| 13 | Cyrus-David MS, et al.                |
| 14 | Amonkar MM, et al.                    |
| 16 | Selvin E, et al. (Non-Hispanic White) |
| 16 | Selvin E, et al. (Non-Hispanic Black) |
| 16 | Selvin E, et al. (Hispanic)           |

**Associated factor      Study ID      Study      Pooled adherence rate**

- 27      Cho IS, et al.
- 29      De Alba I, et al.
- 30      Kwak MS, et al.
- 32      Carruth AK, et al.
- 37      Tsui J, et al.
- 41      Nelson W, et al.
- 43      Dimitrakaki C, et al.
- 47      Martin-Lopez R, et al.
- 50      Lopez-de-Andres A, et al.
- 51      Lim JW. (Latina)
- 51      Lim JW. (Asian)
- 60      Nuno T, et al.
- 61      Hansen BT, et al.
- 66      Liang Q, et al.
- 70      Damiani G, et al.
- 71      Martin-Lopez R, et al.
- 85      Borges MF, et al.
- 89      Cerigo H, et al.
- 91      Khadilkar A, et al.
- 92      Lee M, et al. (1998)
- 92      Lee M, et al. (2001)
- 92      Lee M, et al. (2005)
- 92      Lee M, et al. (2008)
- 92      Lee M, et al. (2010)
- 98      Kristensson JH, et al.
- 104      Ricardo-Rodrigues I, et al.
- 106      Gyulai A, et al.

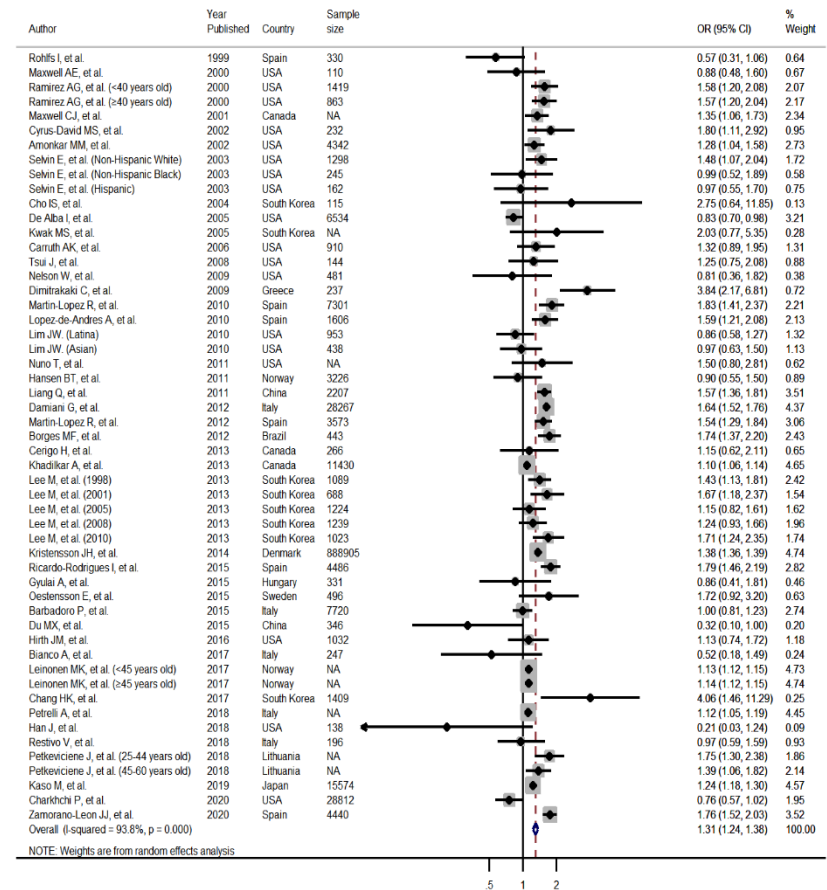

| Associated factor                                              | Study ID | Study                                    | Pooled adherence rate |
|----------------------------------------------------------------|----------|------------------------------------------|-----------------------|
|                                                                | 109      | Oestensson E, et al.                     |                       |
|                                                                | 110      | Barbadoro P, et al.                      |                       |
|                                                                | 111      | Du MX, et al.                            |                       |
|                                                                | 112      | Hirth JM, et al.                         |                       |
|                                                                | 117      | Bianco A, et al.                         |                       |
|                                                                | 120      | Leinonen MK, et al. (<45 years old)      |                       |
|                                                                | 120      | Leinonen MK, et al. (≥45 years old)      |                       |
|                                                                | 126      | Chang HK, et al.                         |                       |
|                                                                | 130      | Petrelli A, et al.                       |                       |
|                                                                | 131      | Han J, et al.                            |                       |
|                                                                | 132      | Restivo V, et al.                        |                       |
|                                                                | 134      | Petkeviciene J, et al. (25-44 years old) |                       |
|                                                                | 134      | Petkeviciene J, et al. (45-60 years old) |                       |
|                                                                | 138      | Kaso M, et al.                           |                       |
|                                                                | 140      | Charkhchi P, et al.                      |                       |
|                                                                | 143      | Zamorano-Leon JJ, et al.                 |                       |
| <hr/>                                                          |          |                                          |                       |
| <b>Higher than high school vs less than high school (n=47)</b> |          |                                          |                       |
|                                                                | 5        | Rohlf I, et al.                          |                       |
|                                                                | 7        | Maxwell AE, et al.                       |                       |
|                                                                | 9        | Maxwell CJ, et al.                       |                       |
|                                                                | 12       | Lee J, et al.                            |                       |
|                                                                | 13       | Cyrus-David MS, et al.                   |                       |
|                                                                | 14       | Amonkar MM, et al.                       |                       |
|                                                                | 16       | Selvin E, et al. (Non-Hispanic White)    |                       |
|                                                                | 16       | Selvin E, et al. (Non-Hispanic Black)    |                       |
|                                                                | 16       | Selvin E, et al. (Hispanic)              |                       |

**Associated factor      Study ID      Study      Pooled adherence rate**

- 29 De Alba I, et al.
- 30 Kwak MS, et al.
- 32 Carruth AK, et al.
- 37 Tsui J, et al.
- 41 Nelson W, et al.
- 43 Dimitrakaki C, et al.
- 47 Martin-Lopez R, et al.
- 50 Lopez-de-Andres A, et al.
- 51 Lim JW. (Latina)
- 51 Lim JW. (Asian)
- 60 Nuno T, et al.
- 61 Hansen BT, et al.
- 71 Martin-Lopez R, et al.
- 92 Lee M, et al. (1998)
- 92 Lee M, et al. (2001)
- 92 Lee M, et al. (2005)
- 92 Lee M, et al. (2008)
- 92 Lee M, et al. (2010)
- 98 Kristensson JH, et al.
- 101 Documet P, et al.
- 104 Ricardo-Rodrigues I, et al.
- 106 Gyulai A, et al.
- 109 Oestensson E, et al.
- 110 Barbadoro P, et al.
- 111 Du MX, et al.
- 112 Hirth JM, et al.
- 117 Bianco A, et al.

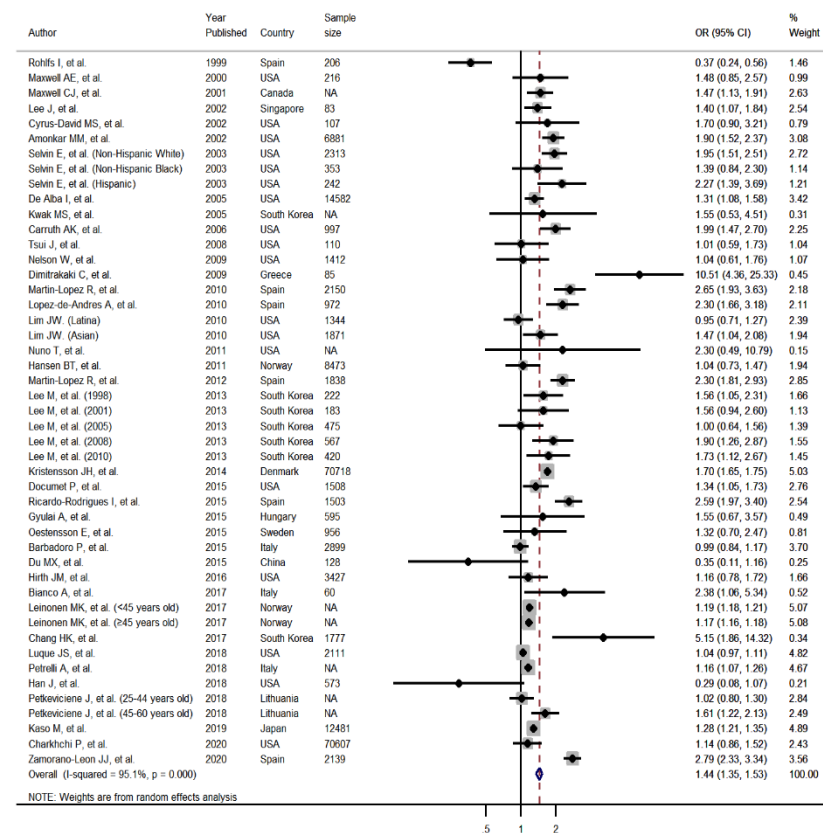

| Associated factor | Study ID | Study                                    | Pooled adherence rate |
|-------------------|----------|------------------------------------------|-----------------------|
|                   | 120      | Leinonen MK, et al. (<45 years old)      |                       |
|                   | 120      | Leinonen MK, et al. (≥45 years old)      |                       |
|                   | 126      | Chang HK, et al.                         |                       |
|                   | 128      | Luque JS, et al.                         |                       |
|                   | 130      | Petrelli A, et al.                       |                       |
|                   | 131      | Han J, et al.                            |                       |
|                   | 134      | Petkeviciene J, et al. (25-44 years old) |                       |
|                   | 134      | Petkeviciene J, et al. (45-60 years old) |                       |
|                   | 138      | Kaso M, et al.                           |                       |
|                   | 140      | Charkhchi P, et al.                      |                       |
|                   | 143      | Zamorano-Leon JJ, et al.                 |                       |

| Associated factor 3: Healthcare  |    |                                    |  |
|----------------------------------|----|------------------------------------|--|
| <b>Healthcare coverage (n=4)</b> |    |                                    |  |
|                                  | 8  | Ramirez AG, et al. (<40 years old) |  |
|                                  | 8  | Ramirez AG, et al. (≥40 years old) |  |
|                                  | 14 | Amonkar MM, et al.                 |  |
|                                  | 49 | Byrne MM, et al.                   |  |

| Associated factor | Study ID | Study | Pooled adherence rate |
|-------------------|----------|-------|-----------------------|
|-------------------|----------|-------|-----------------------|

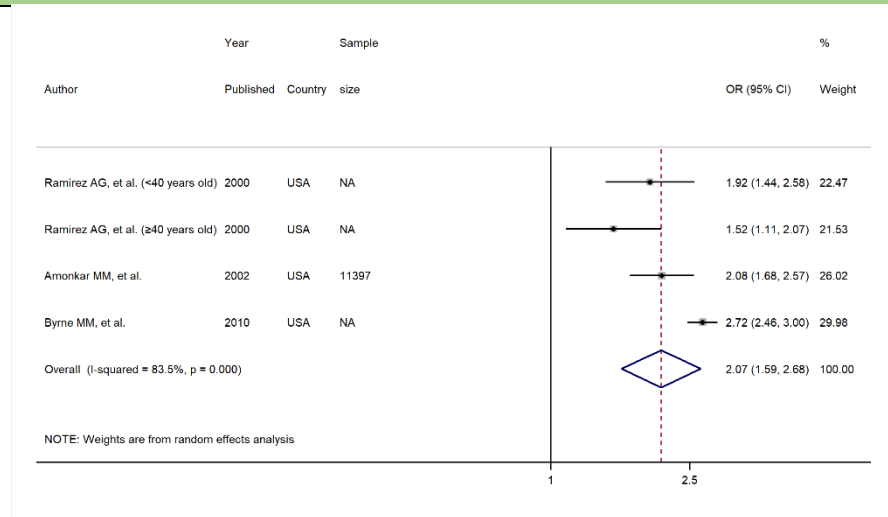

**Insurance (n=8)**

|     |                    |
|-----|--------------------|
| 7   | Maxwell AE, et al. |
| 30  | Kwak MS, et al.    |
| 45  | Taylor VM, et al.  |
| 51  | Lim JW. (Latina)   |
| 51  | Lim JW. (Asian)    |
| 60  | Nuno T, et al.     |
| 111 | Du MX, et al.      |
| 131 | Han J, et al.      |

**Associated factor      Study ID      Study      Pooled adherence rate**

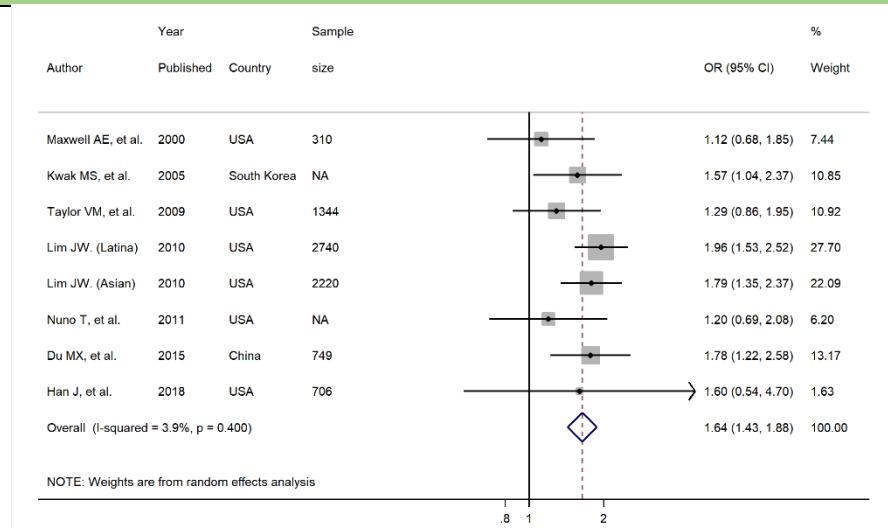

**Associated factor 4: Employment status (Employed vs Unemployed) (n=20)**

- 5 Rohlfs I, et al.
- 13 Cyrus-David MS, et al.
- 17 Juon HS, et al.
- 51 Lim JW. (Latina)
- 51 Lim JW. (Asian)
- 60 Nuno T, et al.
- 70 Damiani G, et al.
- 73 Olesen, SC, et al.
- 85 Borges MF, et al.
- 88 Oussaid N, et al.
- 103 Visanuyothin S, et al.
- 106 Gyulai A, et al.

**Associated factor      Study ID      Study      Pooled adherence rate**

|     |                                     |
|-----|-------------------------------------|
| 109 | Oestensson E, et al.                |
| 117 | Bianco A, et al.                    |
| 120 | Leinonen MK, et al. (<45 years old) |
| 120 | Leinonen MK, et al. (≥45 years old) |
| 126 | Chang HK, et al.                    |
| 130 | Petrelli A, et al.                  |
| 138 | Kaso M, et al.                      |
| 140 | Charkhchi P, et al.                 |

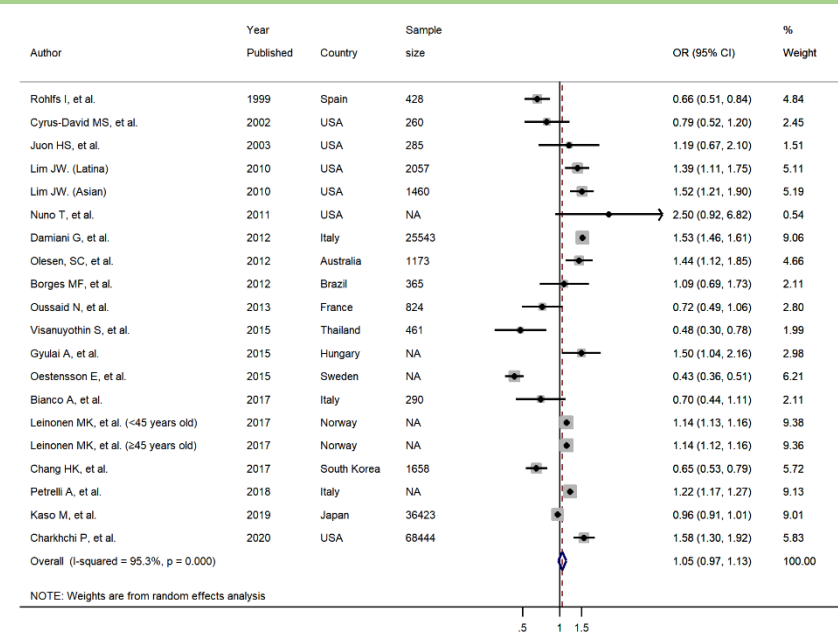

**Associated factor 5: Body-mass index**

**Obesity: BMI ≥30.0 kg/m<sup>2</sup> vs Non-obesity (n=9)**

|     |                                          |
|-----|------------------------------------------|
| 14  | Amonkar MM, et al.                       |
| 47  | Martin-Lopez R, et al.                   |
| 50  | Lopez-de-Andres A, et al.                |
| 71  | Martin-Lopez R, et al.                   |
| 73  | Olesen, SC, et al.                       |
| 104 | Ricardo-Rodrigues I, et al.              |
| 134 | Petkeviciene J, et al. (25-44 years old) |
| 134 | Petkeviciene J, et al. (45-60 years old) |



| Associated factor | Study ID | Study | Pooled adherence rate |
|-------------------|----------|-------|-----------------------|
|-------------------|----------|-------|-----------------------|

143 Zamorano-Leon JJ, et al.

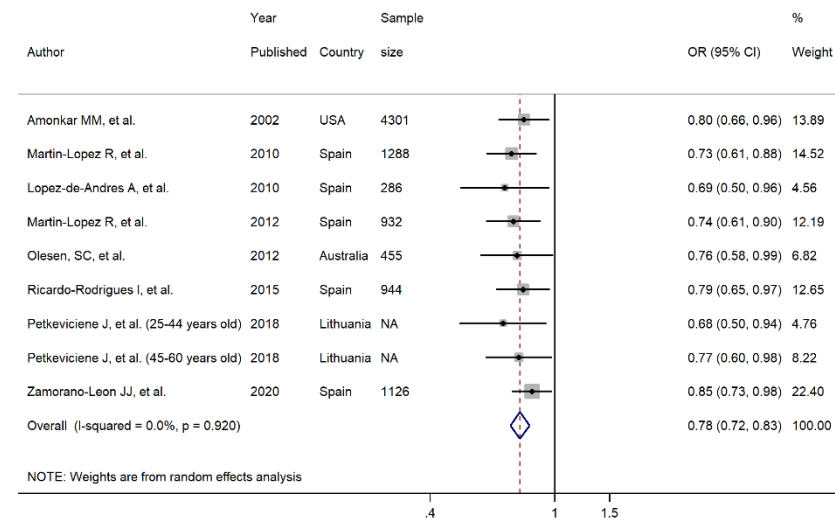

**Underweight: BMI <18.5 kg/m<sup>2</sup> vs Normal: BMI 18.5-24.9 kg/m<sup>2</sup> (n=8)**

- 41 Nelson W, et al.
- 51 Lim JW. (Latina)
- 51 Lim JW. (Asian)
- 70 Damiani G, et al.
- 107 Richard A, et al.
- 127 Cofie LE, et al.
- 139 Perez CM, et al.
- 140 Charkhchi P, et al.

| Associated factor | Study ID | Study | Pooled adherence rate |
|-------------------|----------|-------|-----------------------|
|-------------------|----------|-------|-----------------------|

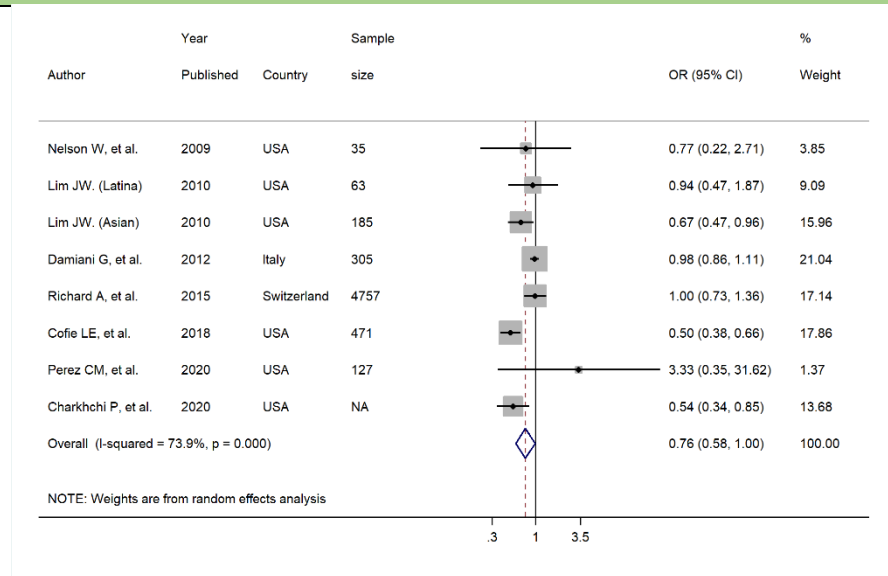

**Overweight: BMI 25.0-30.0 kg/m<sup>2</sup> vs Normal: BMI 18.5-24.9 kg/m<sup>2</sup> (n=12)**

- 41 Nelson W, et al.
- 51 Lim JW. (Latina)
- 51 Lim JW. (Asian)
- 59 Tekkel M, et al.
- 70 Damiani G, et al.
- 81 Leone LA, et al.
- 107 Richard A, et al.
- 112 Hirth JM, et al.
- 127 Cofie LE, et al.
- 128 Luque JS, et al.
- 139 Perez CM, et al.

| Associated factor | Study ID | Study | Pooled adherence rate |
|-------------------|----------|-------|-----------------------|
|-------------------|----------|-------|-----------------------|

140 Charkhchi P, et al.

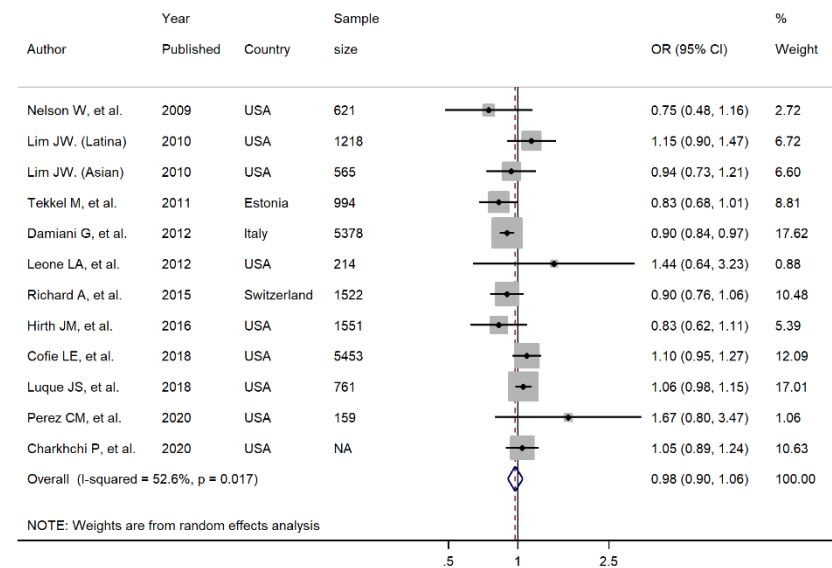

**Obesity: BMI ≥30.0 kg/m<sup>2</sup> vs Normal: BMI 18.5-24.9 kg/m<sup>2</sup> (n=12)**

- 41 Nelson W, et al.
- 51 Lim JW. (Latina)
- 51 Lim JW. (Asian)
- 59 Tekkel M, et al.
- 70 Damiani G, et al.
- 81 Leone LA, et al.
- 107 Richard A, et al.
- 112 Hirth JM, et al.
- 127 Cofie LE, et al.

**Associated factor      Study ID      Study      Pooled adherence rate**

128      Luque JS, et al.  
 139      Perez CM, et al.  
 140      Charkhchi P, et al.

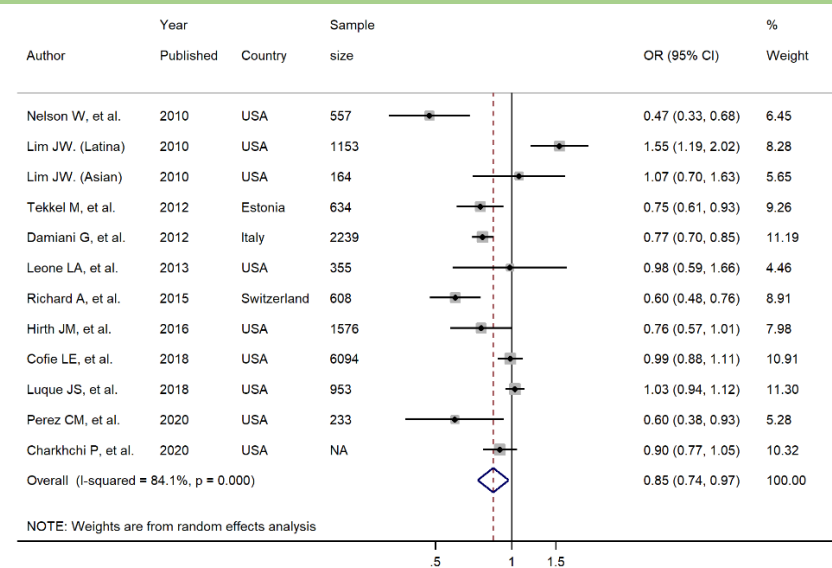

**Associated factor 6: Smoking**

**Smoker vs Non-smoker (n=14)**

14      Amonkar MM, et al.  
 30      Kwak MS, et al.  
 43      Dimitrakaki C, et al.  
 49      Byrne MM, et al.  
 47      Martin-Lopez R, et al.  
 75      Ko KD, et al.  
 82      Shippee ND, et al.  
 88      Oussaid N, et al.  
 106      Gyulai A, et al.

| Associated factor | Study ID | Study                                    | Pooled adherence rate |  |  |  |  |  |
|-------------------|----------|------------------------------------------|-----------------------|--|--|--|--|--|
|                   | 110      | Barbadoro P, et al.                      |                       |  |  |  |  |  |
|                   | 134      | Petkeviciene J, et al. (25-44 years old) |                       |  |  |  |  |  |
|                   | 134      | Petkeviciene J, et al. (45-60 years old) |                       |  |  |  |  |  |
|                   | 143      | Zamorano-Leon JJ, et al.                 |                       |  |  |  |  |  |
|                   | 140      | Charkhchi P, et al.                      |                       |  |  |  |  |  |

  

| Author                                   | Year Published | Country     | Sample size | OR (95% CI)       | % Weight |
|------------------------------------------|----------------|-------------|-------------|-------------------|----------|
| Amonkar MM, et al.                       | 2002           | USA         | 3035        | 0.87 (0.73, 1.03) | 9.83     |
| Kwak MS, et al.                          | 2005           | South Korea | NA          | 1.09 (0.42, 2.81) | 1.99     |
| Dimitrakaki C, et al.                    | 2009           | Greece      | 180         | 1.10 (0.69, 1.75) | 5.33     |
| Byrne MM, et al.                         | 2010           | USA         | NA          | 0.60 (0.55, 0.66) | 10.89    |
| Martin-Lopez R, et al.                   | 2010           | Spain       | 2999        | 1.05 (0.91, 1.22) | 10.21    |
| Ko KD, et al.                            | 2012           | South Korea | 99          | 1.56 (0.73, 3.33) | 2.84     |
| Shippee ND, et al.                       | 2012           | USA         | NA          | 0.38 (0.11, 1.36) | 1.21     |
| Oussaid N, et al.                        | 2013           | France      | 188         | 1.32 (0.81, 2.16) | 5.02     |
| Gyulai A, et al.                         | 2015           | Hungary     | NA          | 0.55 (0.36, 0.83) | 5.99     |
| Barbadoro P, et al.                      | 2015           | Italy       | 4424        | 0.95 (0.86, 1.05) | 10.81    |
| Petkeviciene J, et al. (25-44 years old) | 2018           | Lithuania   | NA          | 1.01 (0.77, 1.33) | 8.12     |
| Petkeviciene J, et al. (45-60 years old) | 2018           | Lithuania   | NA          | 0.75 (0.54, 1.04) | 7.26     |
| Zamorano-Leon JJ, et al.                 | 2020           | Spain       | 2101        | 0.91 (0.81, 1.02) | 10.59    |
| Charkhchi P, et al.                      | 2020           | USA         | 18221       | 0.80 (0.68, 0.95) | 9.91     |
| Overall (I-squared = 84.6%, p = 0.000)   |                |             |             | 0.87 (0.75, 1.01) | 100.00   |

NOTE: Weights are from random effects analysis

**Current vs Former/Never (n= 5)**

|    |                                       |
|----|---------------------------------------|
| 9  | Maxwell CJ, et al.                    |
| 16 | Selvin E, et al. (Non-Hispanic White) |
| 16 | Selvin E, et al. (Non-Hispanic Black) |
| 16 | Selvin E, et al. (Hispanic)           |
| 73 | Olesen, SC, et al.                    |

| Associated factor | Study ID | Study | Pooled adherence rate |
|-------------------|----------|-------|-----------------------|
|-------------------|----------|-------|-----------------------|

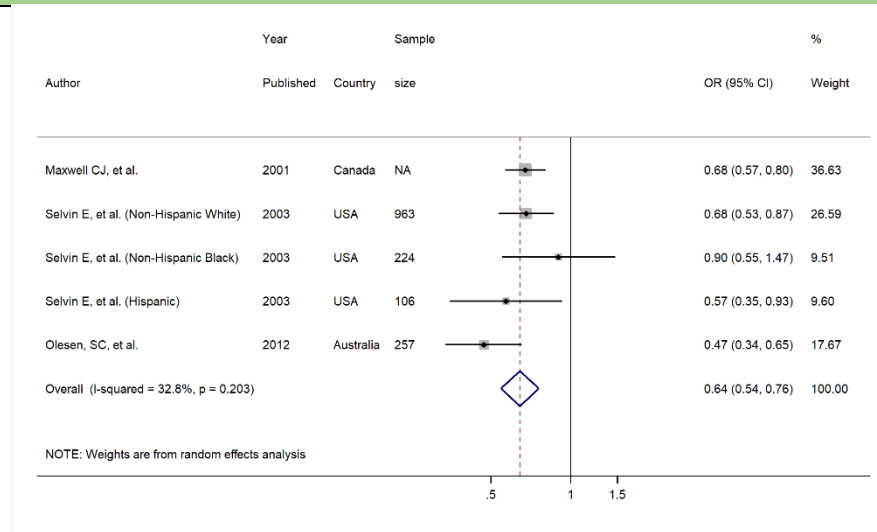

**Current vs Never (n=11)**

- 41 Nelson W, et al.
- 51 Lim JW. (Latina)
- 51 Lim JW. (Asian)
- 61 Hansen BT, et al.
- 62 MacLaughlan SD, et al.
- 70 Damiani G, et al.
- 71 Martin-Lopez R, et al.
- 107 Richard A, et al.
- 126 Chang HK, et al.
- 128 Luque JS, et al.
- 130 Petrelli A, et al.

**Associated factor      Study ID      Study      Pooled adherence rate**

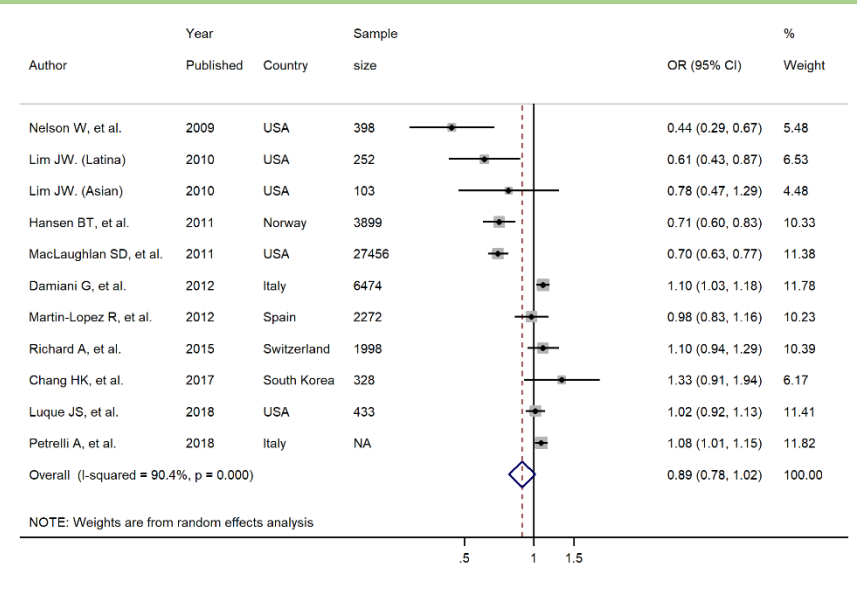

**Former vs Never (n=12)**

|     |                        |
|-----|------------------------|
| 13  | Cyrus-David MS, et al. |
| 41  | Nelson W, et al.       |
| 51  | Lim JW. (Latina)       |
| 51  | Lim JW. (Asian)        |
| 61  | Hansen BT, et al.      |
| 62  | MacLaughlan SD, et al. |
| 70  | Damiani G, et al.      |
| 71  | Martin-Lopez R, et al. |
| 107 | Richard A, et al.      |
| 126 | Chang HK, et al.       |

| Associated factor | Study ID | Study | Pooled adherence rate |
|-------------------|----------|-------|-----------------------|
|-------------------|----------|-------|-----------------------|

128 Luque JS, et al.  
 130 Petrelli A, et al.

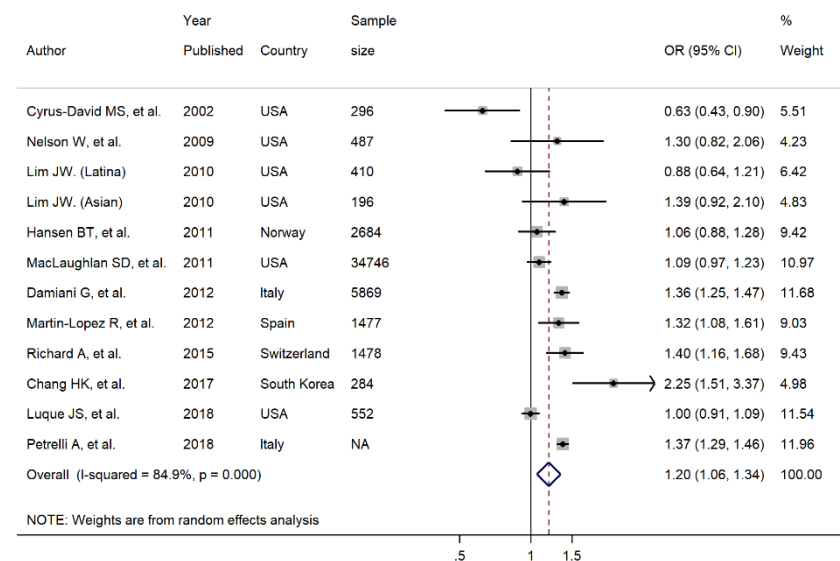

**Associated factor 7: Alcohol drinking (n=12)**

30 Kwak MS, et al.  
 51 Lim JW. (Latina)  
 51 Lim JW. (Asian)  
 61 Hansen BT, et al.  
 82 Shippee ND, et al.  
 104 Ricardo-Rodrigues I, et al.  
 107 Richard A, et al.  
 117 Bianco A, et al.  
 134 Petkeviciene J, et al. (25-44 years old)  
 134 Petkeviciene J, et al. (45-60 years old)



| Associated factor | Study ID | Study | Pooled adherence rate |
|-------------------|----------|-------|-----------------------|
|-------------------|----------|-------|-----------------------|

143 Zamorano-Leon JJ, et al.  
 152 Pelullo CP, et al.

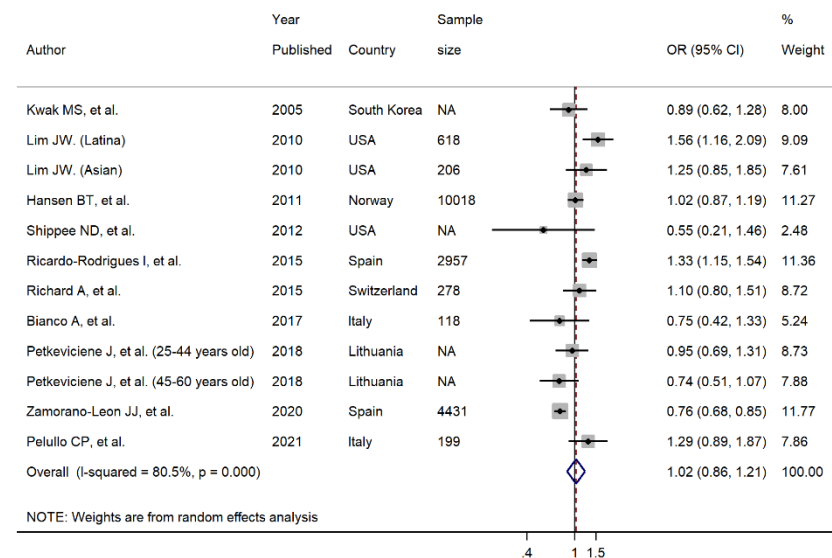

**Associated factor 8: Physical activity (n=11)**

30 Kwak MS, et al.  
 47 Martin-Lopez R, et al.  
 49 Byrne MM, et al.  
 50 Lopez-de-Andres A, et al.  
 51 Lim JW. (Latina)  
 51 Lim JW. (Asian)  
 104 Ricardo-Rodrigues I, et al.  
 117 Bianco A, et al.  
 130 Petrelli A, et al.  
 143 Zamorano-Leon JJ, et al.  
 152 Pelullo CP, et al.

**Associated factor      Study ID      Study      Pooled adherence rate**

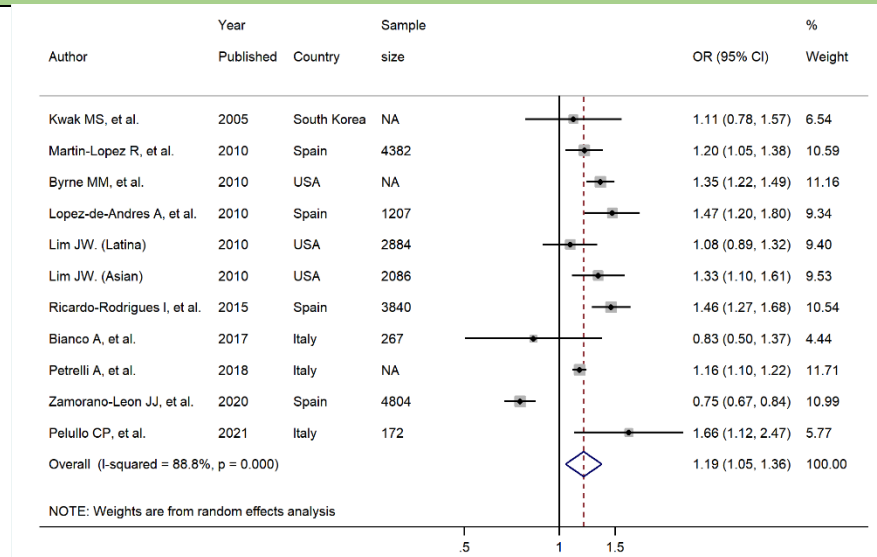

**Associated factor 9: Parity (n=11)**

- 1 Cohen MM, et al.
- 12 Lee J, et al.
- 61 Hansen BT, et al.
- 73 Olesen, SC, et al.
- 88 Oussaid N, et al.
- 89 Cerigo H, et al.
- 103 Visanuyothin S, et al.
- 110 Barbadoro P, et al.
- 120 Leinonen MK, et al. (<45 years old)
- 120 Leinonen MK, et al. (≥45 years old)
- 149 Deguara M, et al.

**Associated factor      Study ID      Study      Pooled adherence rate**

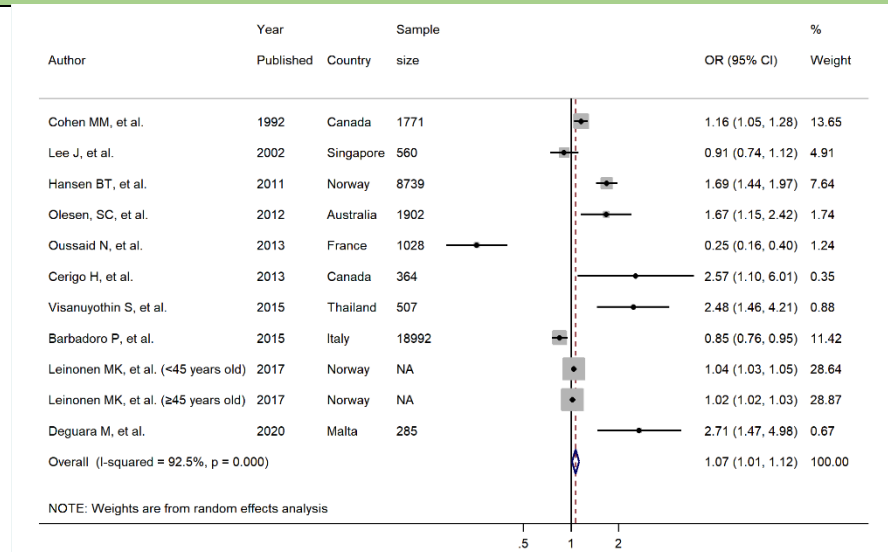

**Associated factor 10: Mental illness (n=3)**

|     |                        |
|-----|------------------------|
| 35  | Chen LS, et al.        |
| 47  | Martin-Lopez R, et al. |
| 138 | Kaso M, et al.         |

| Associated factor | Study ID | Study | Pooled adherence rate |
|-------------------|----------|-------|-----------------------|
|-------------------|----------|-------|-----------------------|

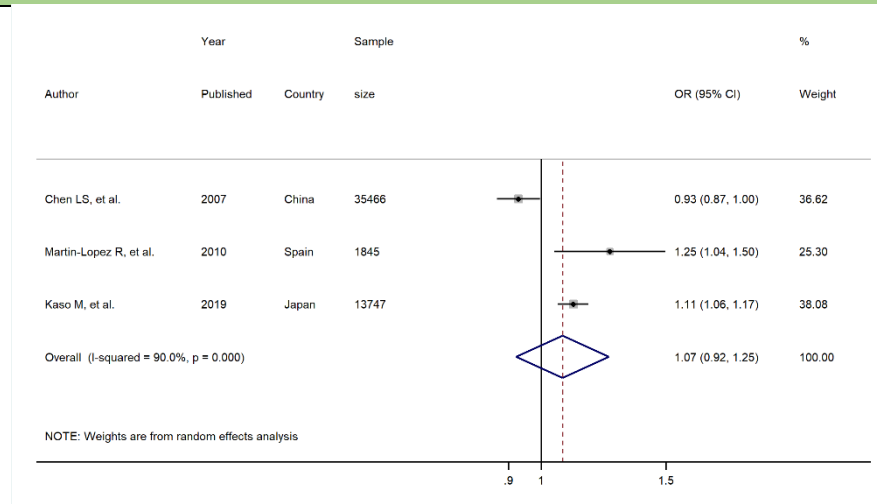

**Associated factor 11: Chronic disease (n=9)**

- 47 Martin-Lopez R, et al.
- 50 Lopez-de-Andres A, et al.
- 71 Martin-Lopez R, et al.
- 104 Ricardo-Rodrigues I, et al.
- 107 Richard A, et al.
- 117 Bianco A, et al.
- 127 Cofie LE, et al.
- 143 Zamorano-Leon JJ, et al.
- 140 Charkhchi P, et al.

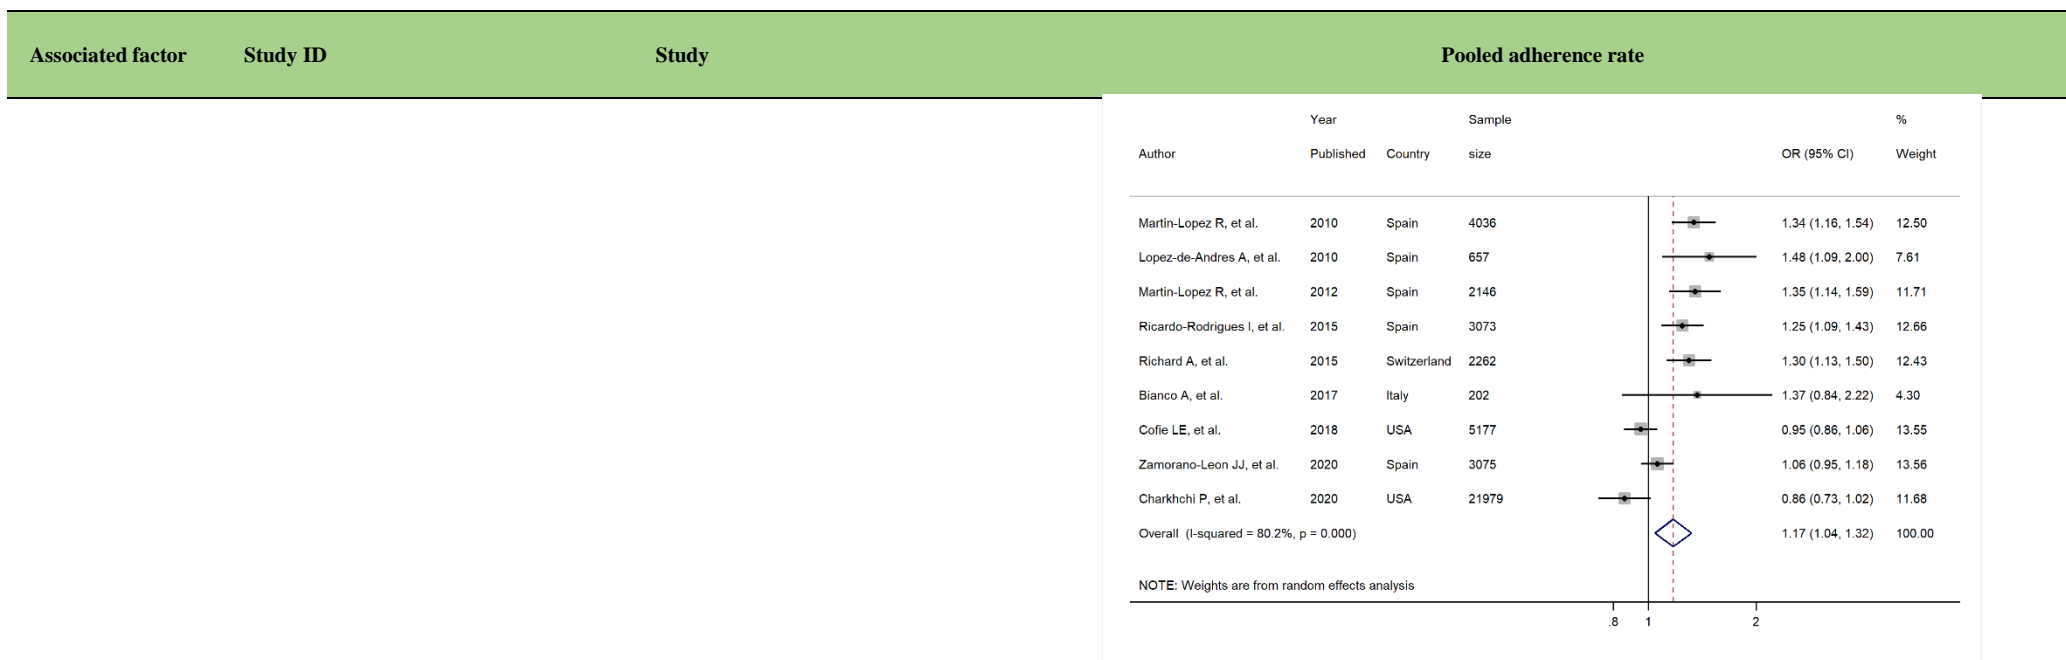

Abbreviations: BMI, body-mass index; CI, confidence interval. The definitions of some associated factors varied slightly across studies. Odds ratios for binary variable associated factors indicated better adherence to cervical cancer screening compared with those without the associated factor, except for married (vs not married), married (vs single), partnered (vs not partnered), currently married (vs never married), previously married (vs never married), married (vs divorced/widowed/separated), divorced/widowed/separated (vs single), high school (vs less than high school), higher than high school (vs less than high school), underweight/BMI <18.5 kg/m<sup>2</sup> (vs normal/BMI 18.5-24.9 kg/m<sup>2</sup>), overweight/BMI 25.0-30.0 kg/m<sup>2</sup>(vs normal/BMI 18.5-24.9 kg/m<sup>2</sup>), obesity/BMI≥30.0 kg/m<sup>2</sup> (vs normal/BMI 18.5-24.9 kg/m<sup>2</sup>), and smoker (vs non-smoker), current smoker (vs former/never), current smoker (vs never), former smoker (vs never).

**Table S9** Pooled or reported adherence rate of cervical cancer screening in 28 countries with available data

| Country                  | No. of articles | No. of data points | Sample size | Adherent women | Adherence rate (95%CI), % |
|--------------------------|-----------------|--------------------|-------------|----------------|---------------------------|
| Australia                | 5               | 5                  | 48,813      | 25,484         | 57.91% (41.89-73.13)      |
| Belgium                  | 2               | 5                  | 10,961,017  | 6,481,271      | 60.03% (57.24-62.79)      |
| Brazil                   | 3               | 3                  | 1,625       | 1,204          | 74.53% (66.63-81.69)      |
| Canada                   | 8               | 8                  | 158,891     | 121,596        | 75.16% (66.52-82.89)      |
| Chile                    | 1               | 1                  | 1,042       | 800            | 76.78% (74.21-79.34)      |
| China                    | 8               | 8                  | 5,838,110   | 3,041,043      | 34.69% (23.40-46.93)      |
| Denmark                  | 1               | 1                  | 1,052,447   | 868,957        | 82.57% (82.49-82.64)      |
| Estonia                  | 1               | 1                  | 3,226       | 1,205          | 37.35% (35.68-39.02)      |
| France                   | 2               | 2                  | 7,368       | 5,652          | 82.30% (65.75-94.21)      |
| Greece                   | 3               | 3                  | 763         | 378            | 43.27% (25.62-61.84)      |
| Hungary                  | 1               | 1                  | 3,306       | 2,446          | 74.00% (72.50-75.50)      |
| Israel                   | 1               | 1                  | 489,663     | 225,795        | 46.11% (45.97-46.25)      |
| Italy                    | 8               | 8                  | 136,911     | 67,088         | 53.57% (37.53-69.25)      |
| Japan                    | 2               | 2                  | 164,471     | 71,368         | 42.33% (37.23-47.51)      |
| Lithuania                | 1               | 5                  | 4,248       | 2,877          | 67.76% (62.32-72.97)      |
| Malta                    | 1               | 1                  | 407         | 281            | 69.00% (64.50-73.50)      |
| New Zealand              | 1               | 1                  | 234         | 131            | 55.98% (49.61-62.35)      |
| Norway                   | 2               | 2                  | 1,321,737   | 873,486        | 77.09% (54.22-93.63)      |
| Singapore                | 1               | 1                  | 726         | 302            | 41.60% (38.01-45.19)      |
| South Africa             | 1               | 1                  | 2,529       | 296            | 11.70% (10.45-12.95)      |
| South Korea              | 8               | 12                 | 31,529      | 15,029         | 46.25% (38.96-53.62)      |
| Spain                    | 10              | 10                 | 64,338      | 43,612         | 66.04% (59.64-72.16)      |
| Sweden                   | 2               | 2                  | 2,623,312   | 1,568,359      | 55.27% (46.15-64.22)      |
| Switzerland              | 1               | 1                  | 7,319       | 5,336          | 72.90% (71.88-73.92)      |
| Thailand                 | 1               | 1                  | 595         | 389            | 65.40% (61.57-69.23)      |
| Turkey                   | 1               | 1                  | 227         | 89             | 39.21% (32.84-45.57)      |
| United Kingdom           | 2               | 2                  | 1,035       | 815            | 74.79% (61.11-86.35)      |
| United States of America | 75              | 83                 | 1,255,717   | 880,534        | 72.69% (68.93-76.29)      |

Abbreviations: CI, confidence interval.

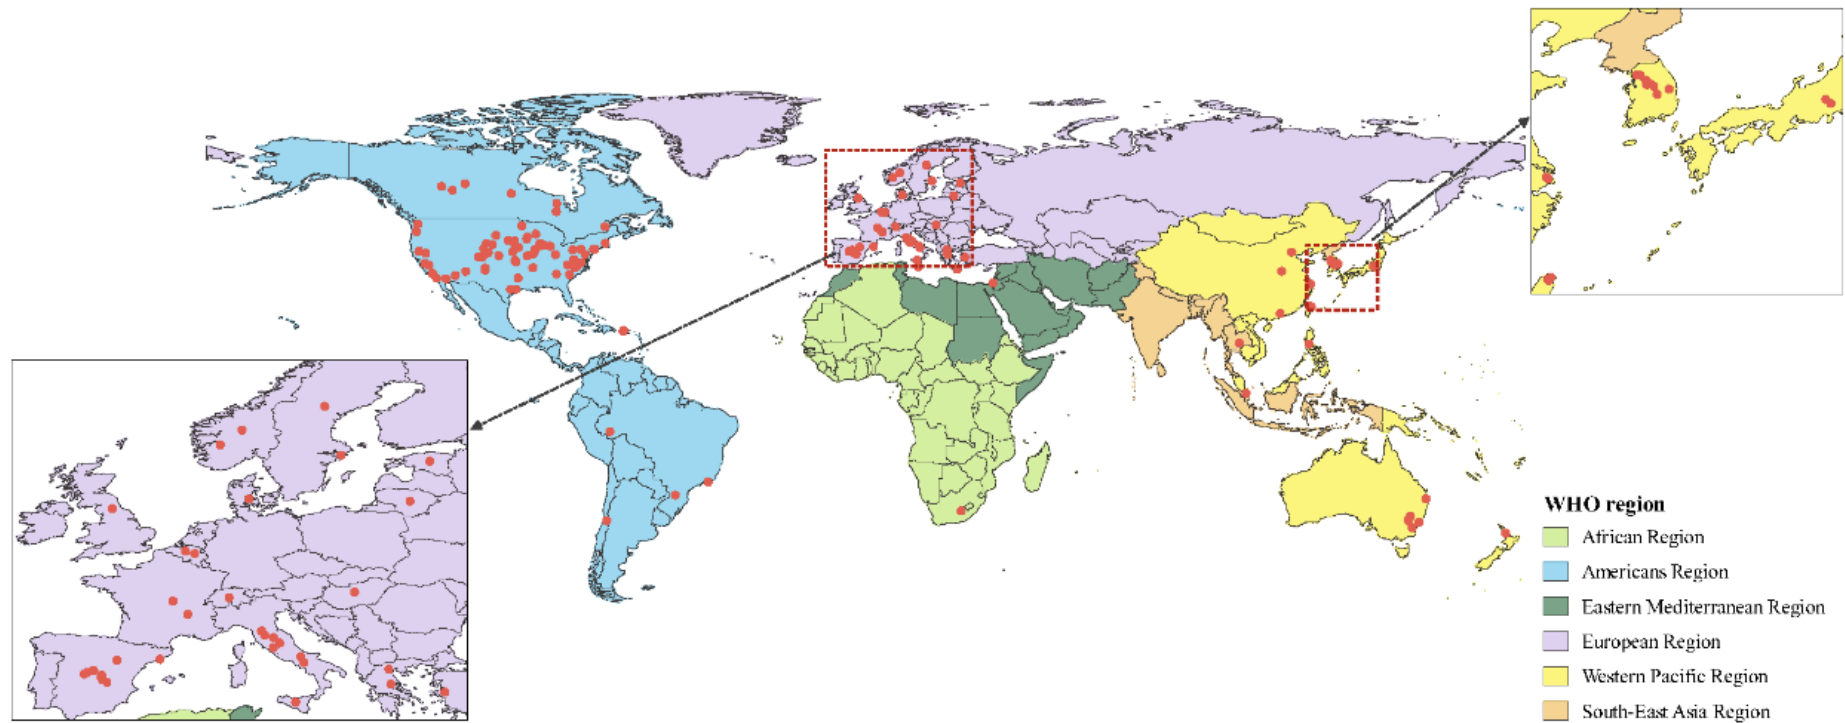

**Figure S1** Geographic distribution of the included studies

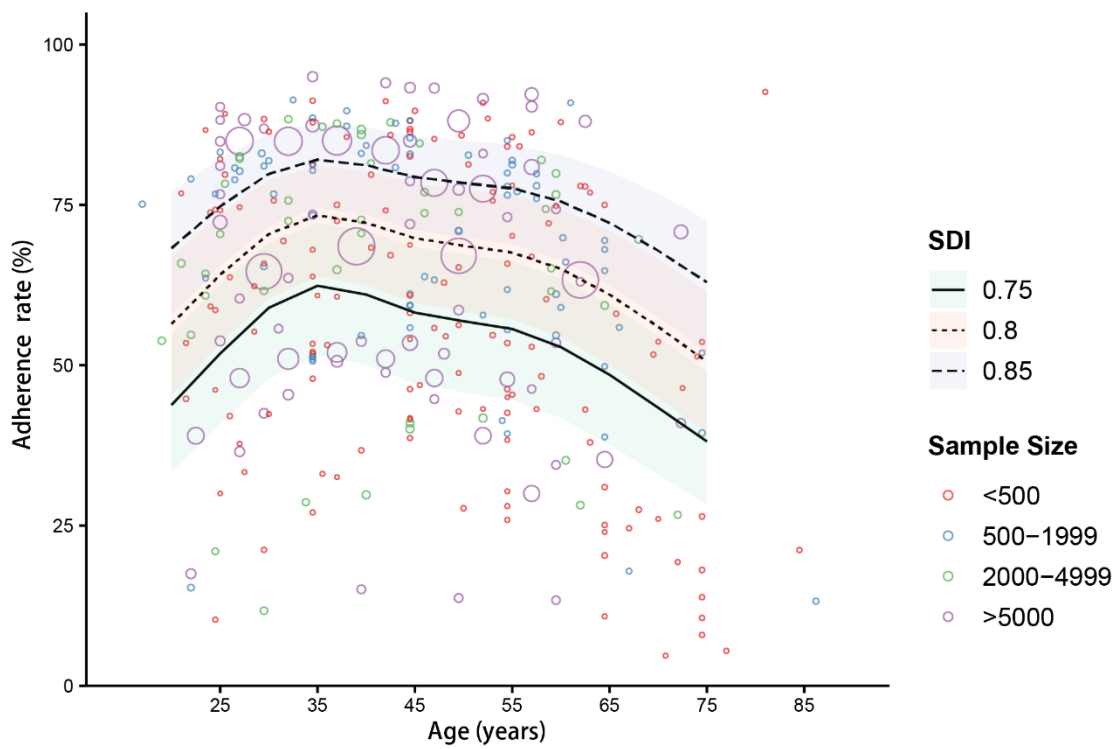

**Figure S2** The estimated relation between age and adherence rates of cervical cancer screening based on informative data points from the included articles, by SDI

Abbreviations: SDI, Socio-demographic Index. The size of the bubble is proportional to the number of individuals in the sample.
